# Supplementary material for: The Reactions of Alkenes with Phenyl-N-triflylimino-λ3-iodane: Solvent and Oxidant Impact
Source: MDPI journal article supplement (doi:10.3390/ijms242115947), 2023-11-03

## Supplementary Information:

# The Reactions of Alkenes with Phenyl-*N*-triflylimino- $\lambda^3$ -iodane: Solvent and Oxidant Impact

Mikhail Yu. Moskalik , Anton S. Ganin \* and Bagrat A. Shainyan

A.E. Favorsky Irkutsk Institute of Chemistry, Siberian Division of the Russian Academy of Sciences, 1 Favorsky Street,  
664033 Irkutsk, Russia; moskalik@irioch.irk.ru (M.Y.M.); bagrat@irioch.irk.ru (B.A.S.)

\* Correspondence: ganin@irioch.irk.ru

---

### Table of Contents

|                                  |     |
|----------------------------------|-----|
| 1.1 Copies of NMR Spectra .....  | S1  |
| 1.2 Copies of HRMS Spectra ..... | S40 |

## 1.1 Copies of NMR spectra

Figure S1.  $^1\text{H}$  NMR (400.1 MHz,  $\text{CDCl}_3$ ) of compound **3**

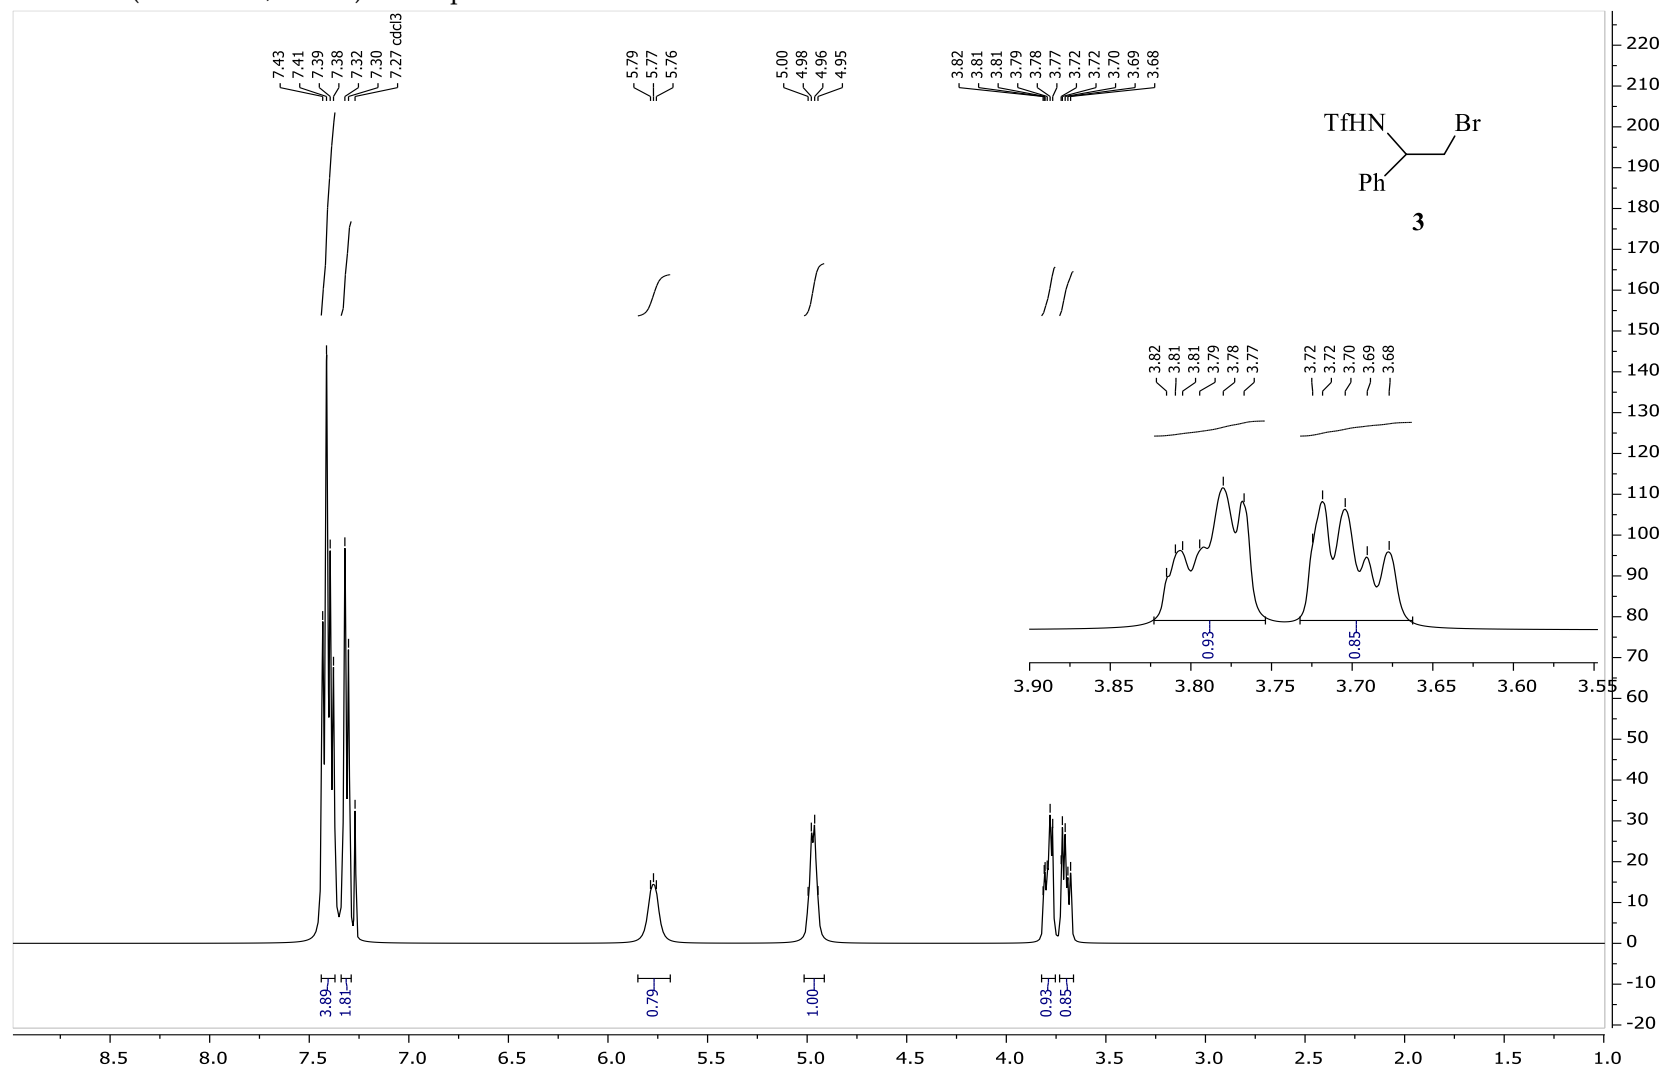

**Figure S2.**  $^{13}\text{C}$  NMR (100.6 MHz,  $\text{CDCl}_3$ ) of compound **3**

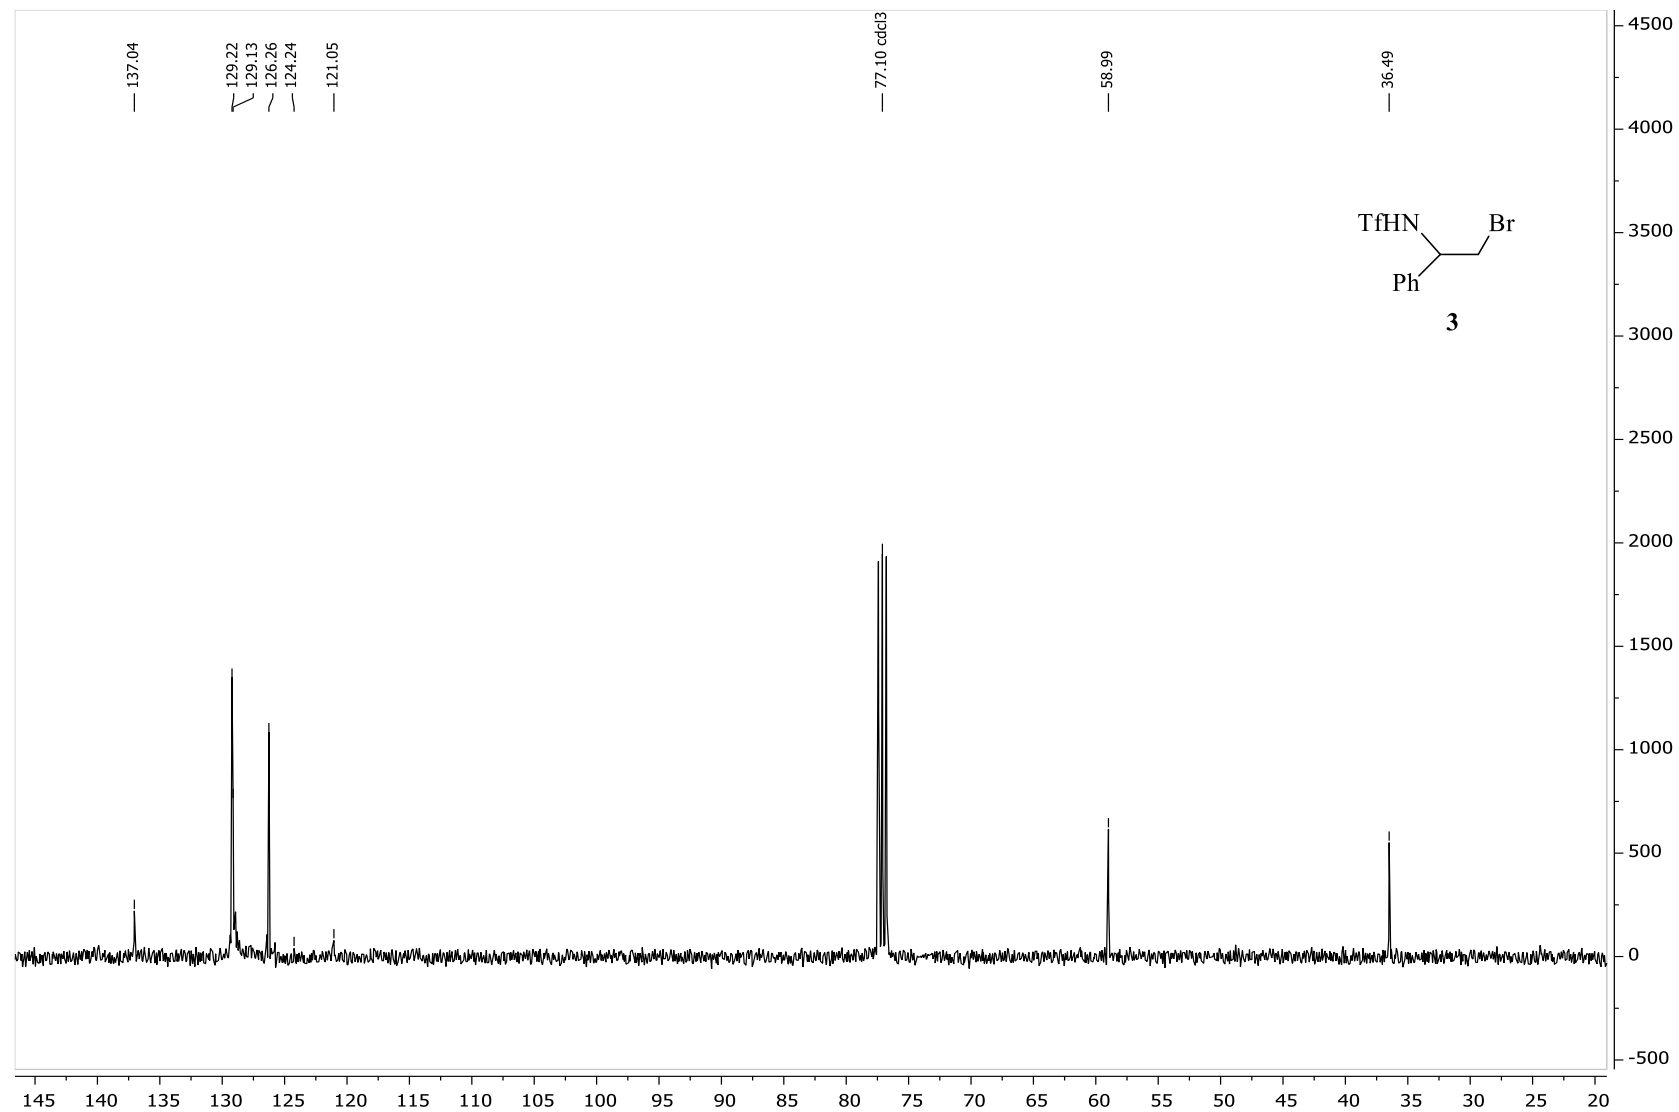

**Figure S3.**  $^{19}\text{F}$  NMR (376 MHz) of compound **3**

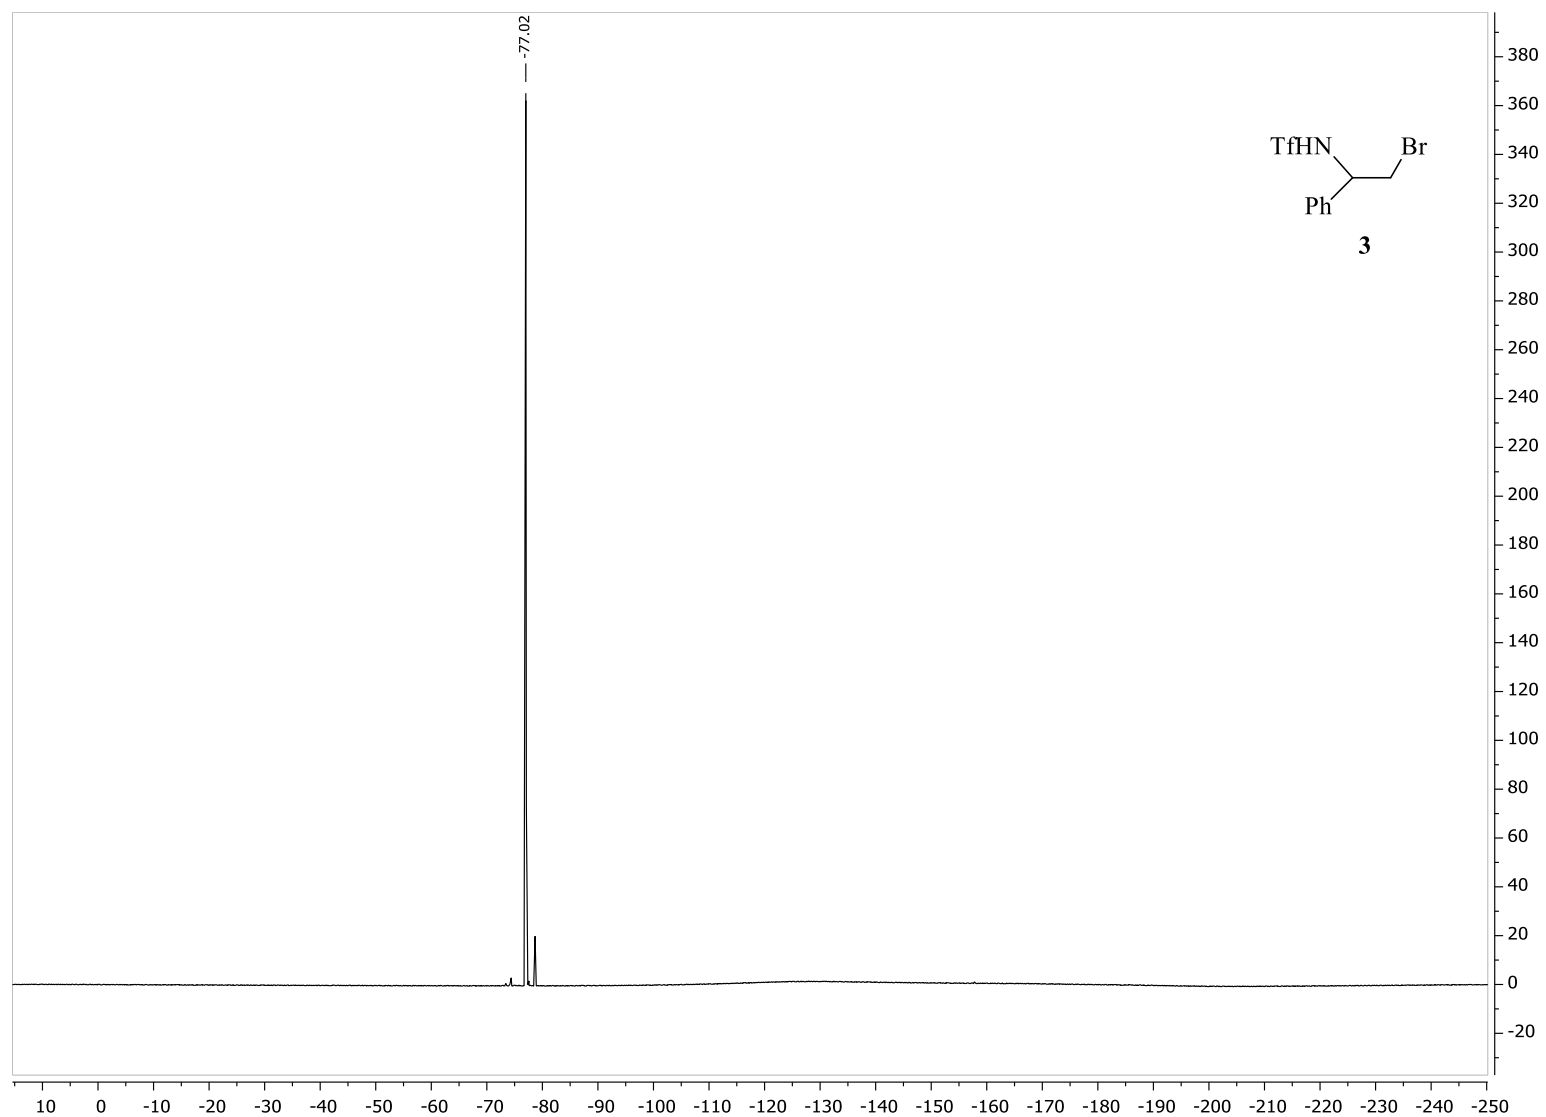

**Figure S4.**  $^1\text{H}$  NMR (400.1 MHz,  $\text{CDCl}_3$ ) of compound **4**

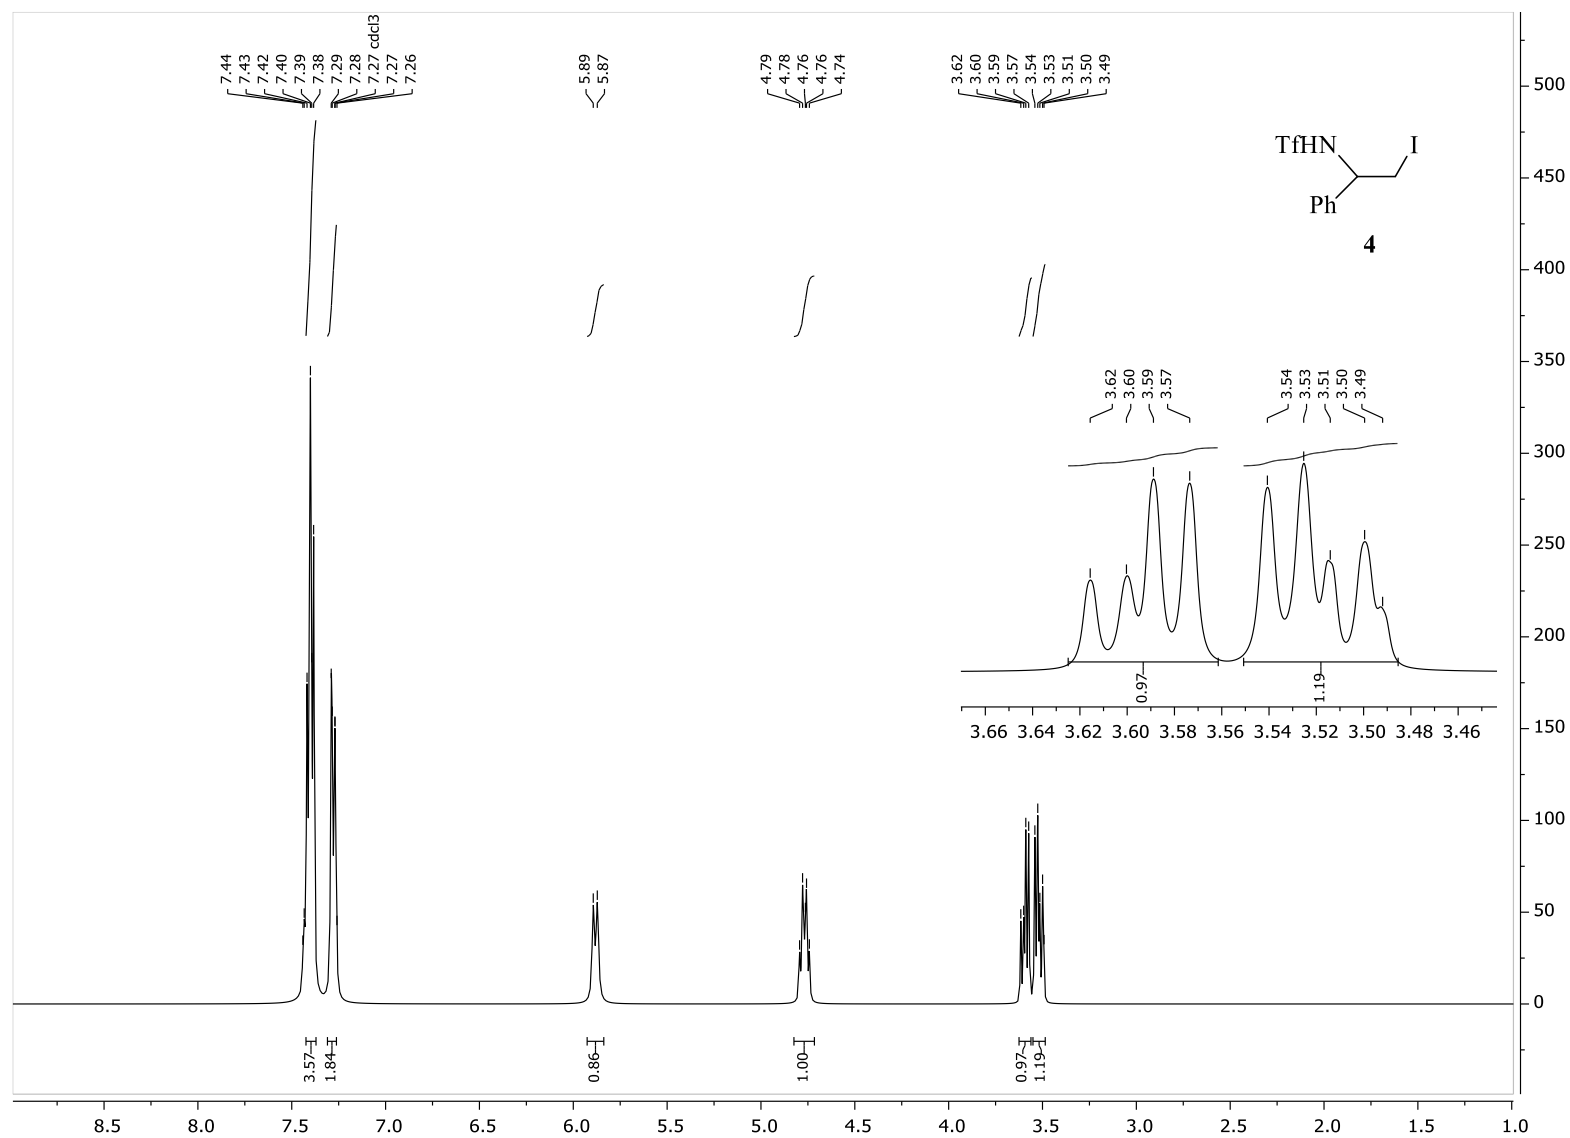

**Figure S5.**  $^{13}\text{C}$  NMR (100.6 MHz,  $\text{CDCl}_3$ ) of compound **4**

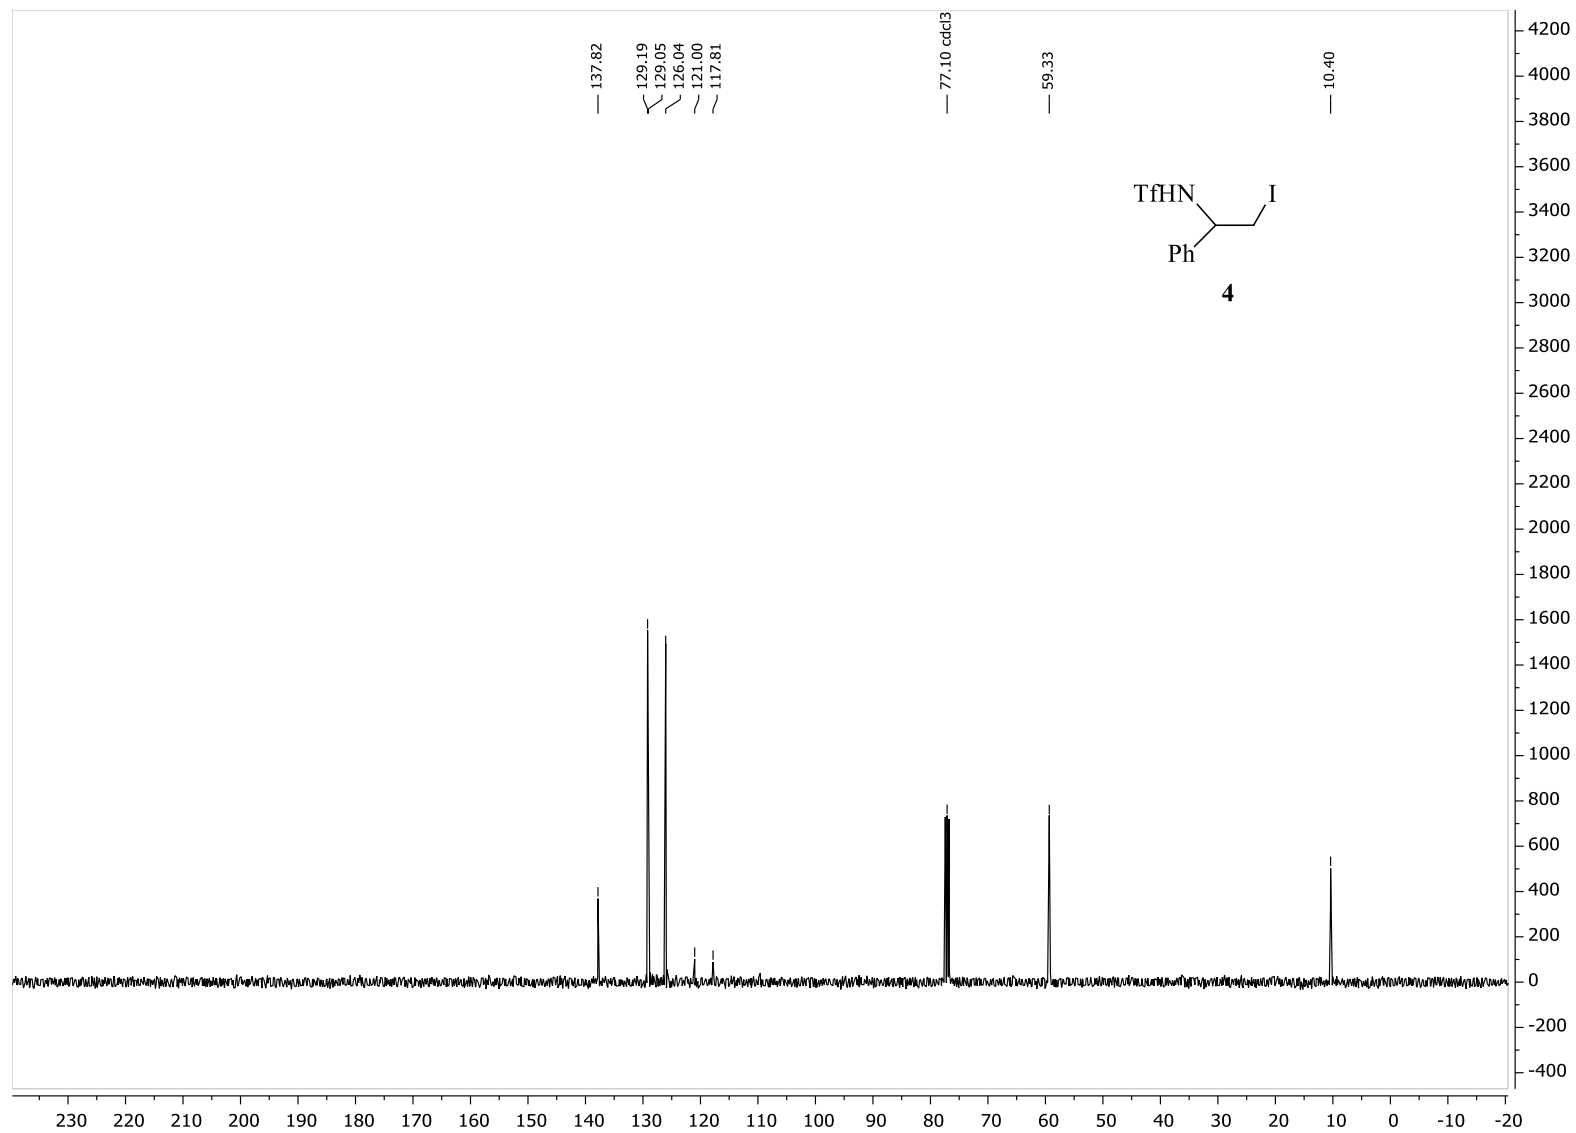

**Figure S6.**  $^{19}\text{F}$  NMR (376 MHz) of compound **4**

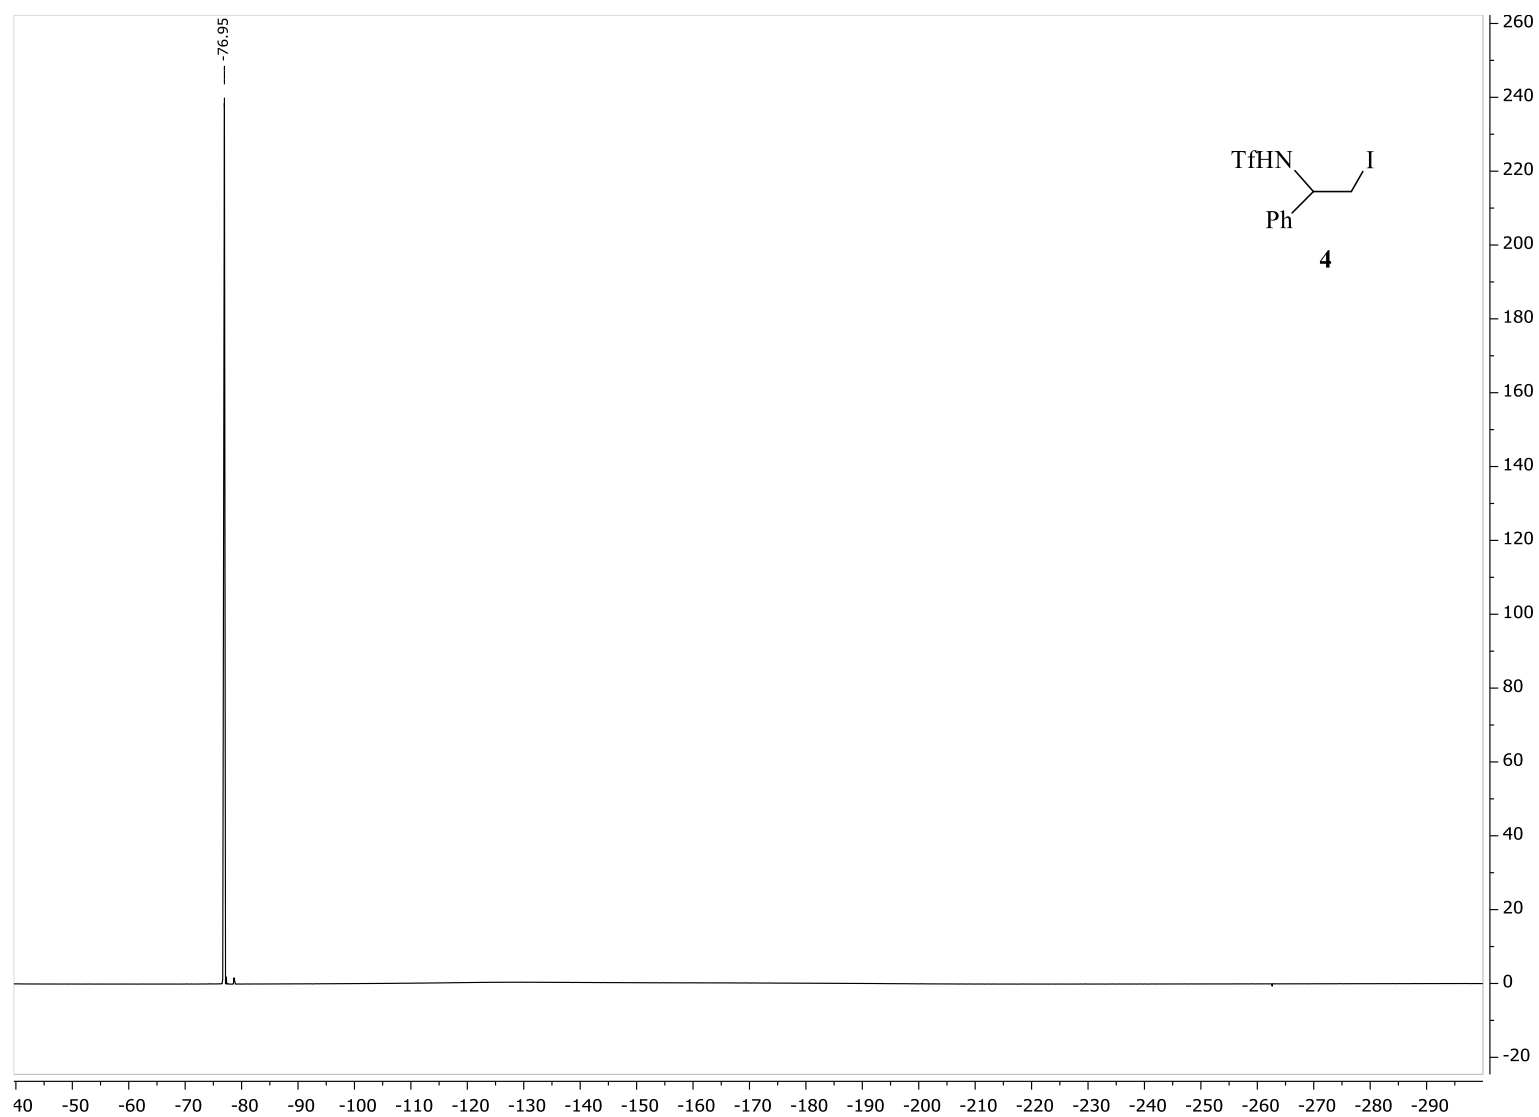

**Figure S7.**  $^1\text{H}$  NMR (400.1 MHz,  $\text{CDCl}_3$ ) of compound **6**

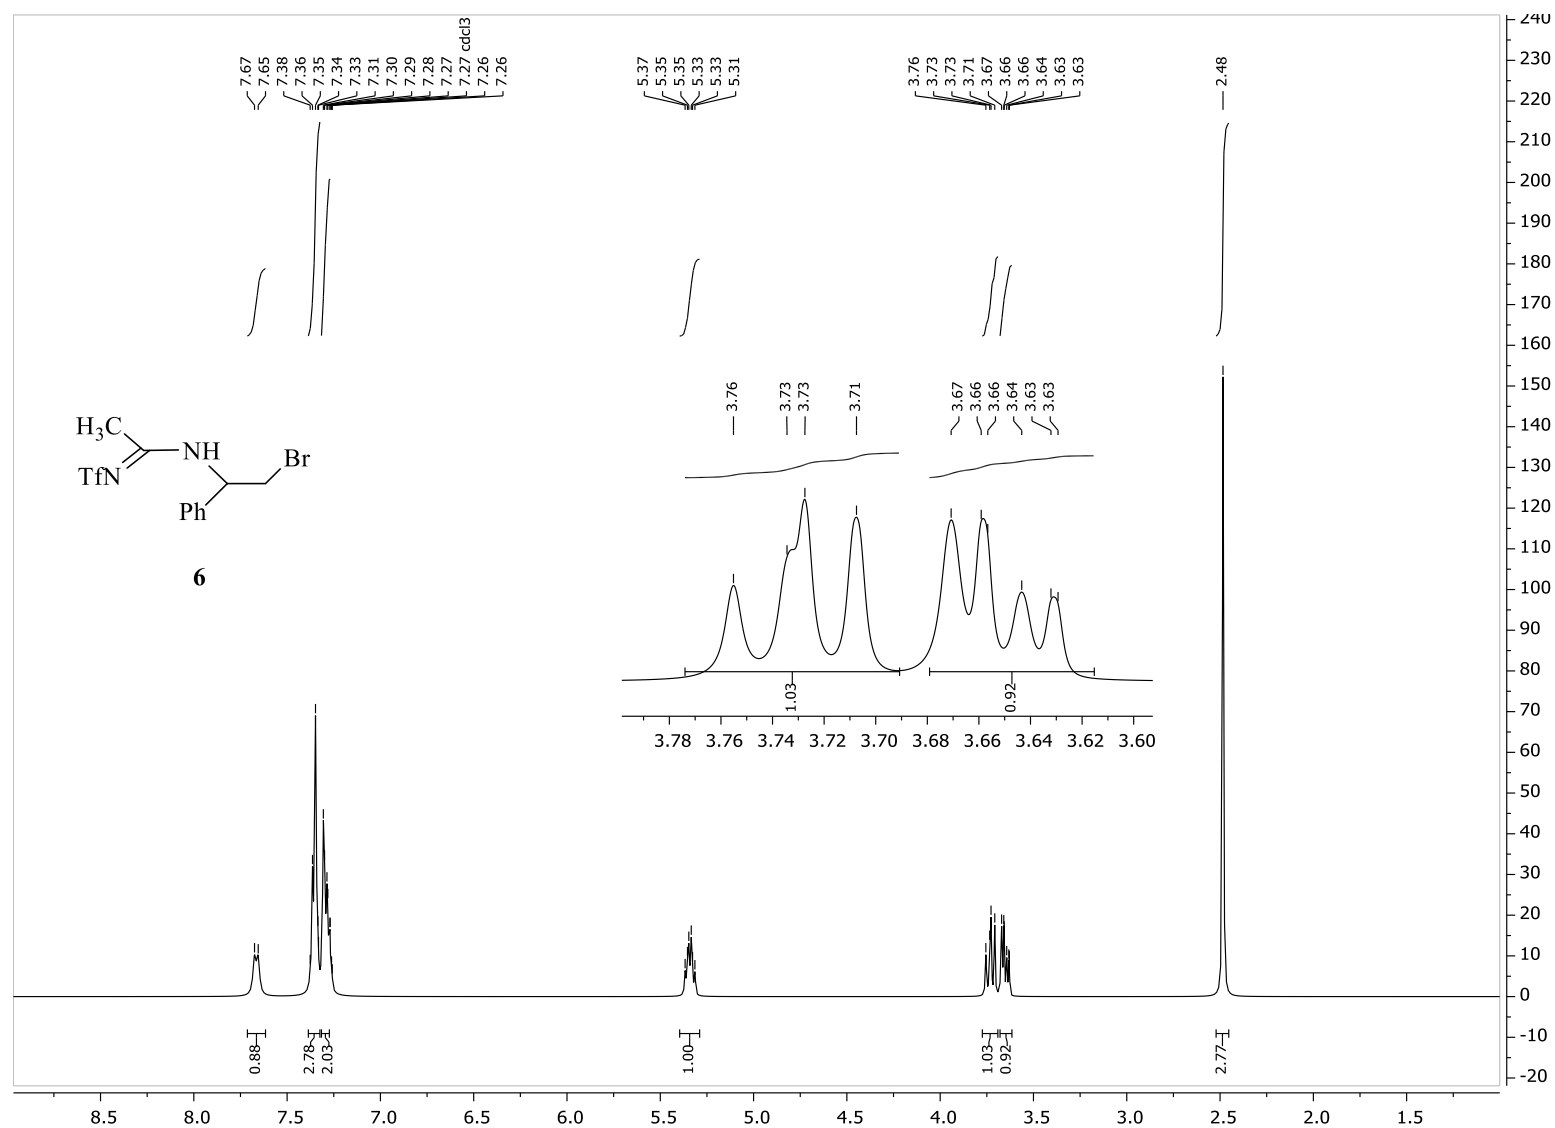



**Figure S8.**  $^{13}\text{C}$  NMR (100.6 MHz,  $\text{CDCl}_3$ ) of compound **6**

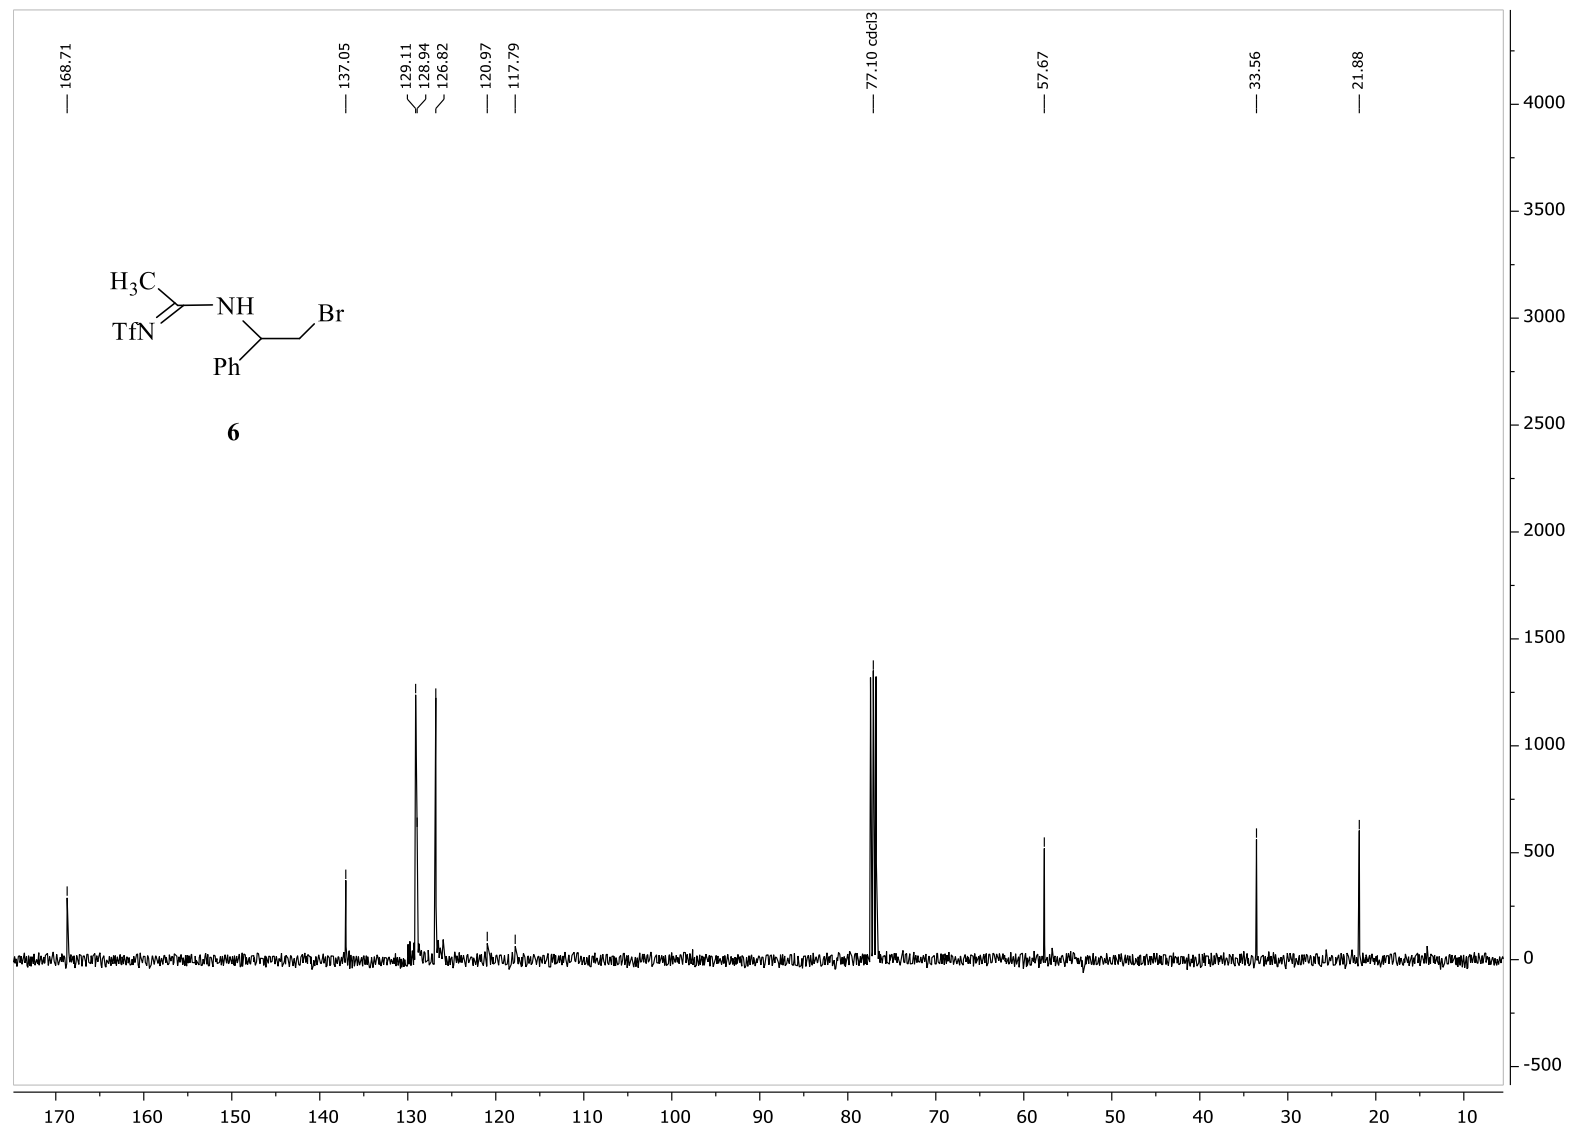

**Figure S9.**  $^{19}\text{F}$  NMR (376 MHz) of compound **6**

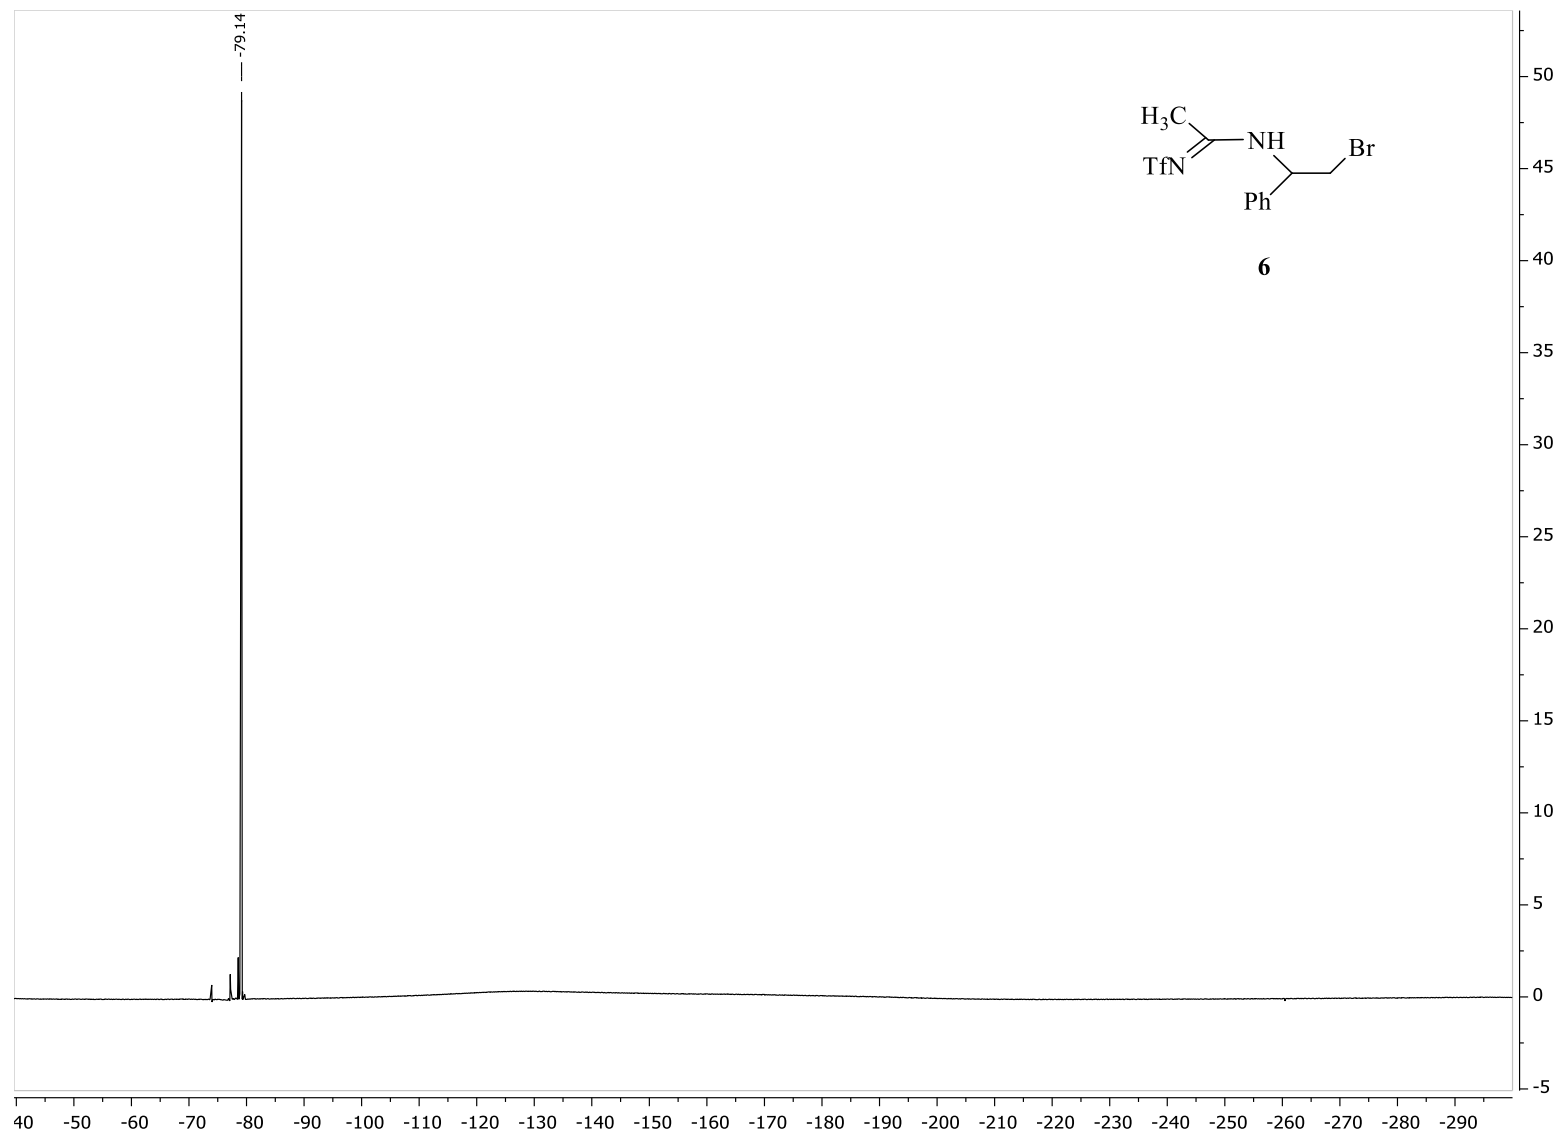

**Figure S10.**  $^1\text{H}$  NMR (400.1 MHz,  $\text{CDCl}_3$ ) of compound **9**

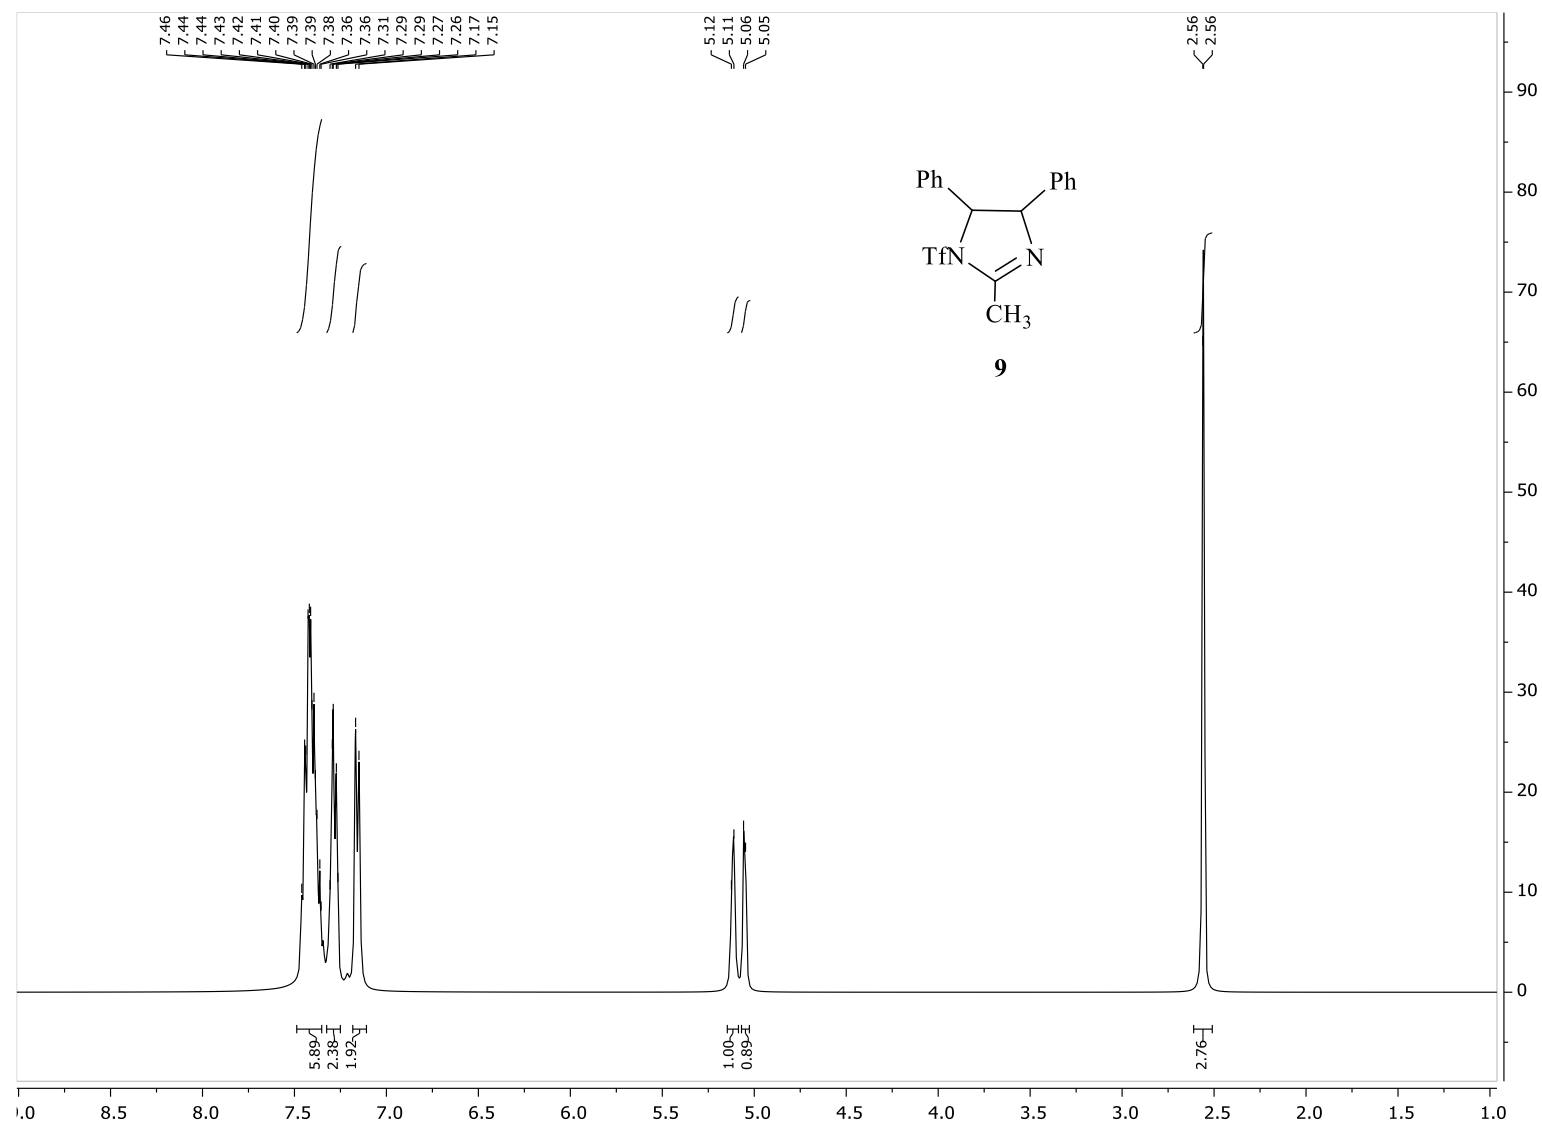

**Figure S11.**  $^{13}\text{C}$  NMR (100.6 MHz,  $\text{CDCl}_3$ ) of compound **9**

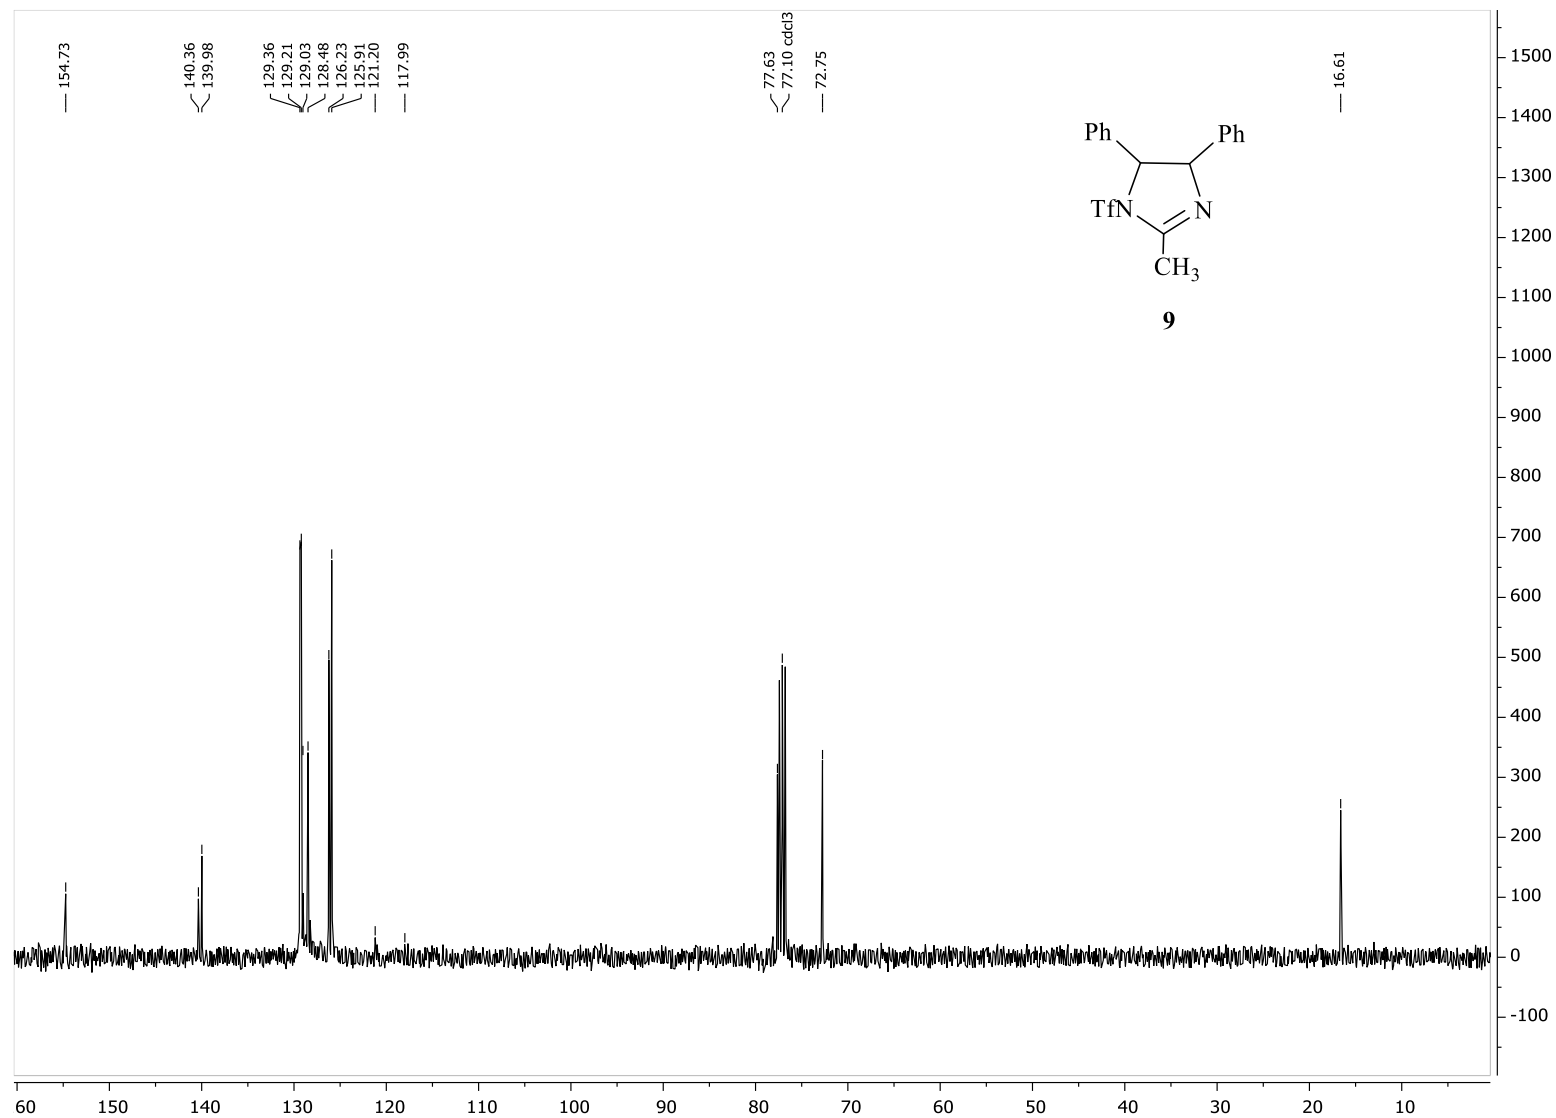

**Figure S12.**  $^{19}\text{F}$  NMR (376 MHz) of compound **9**

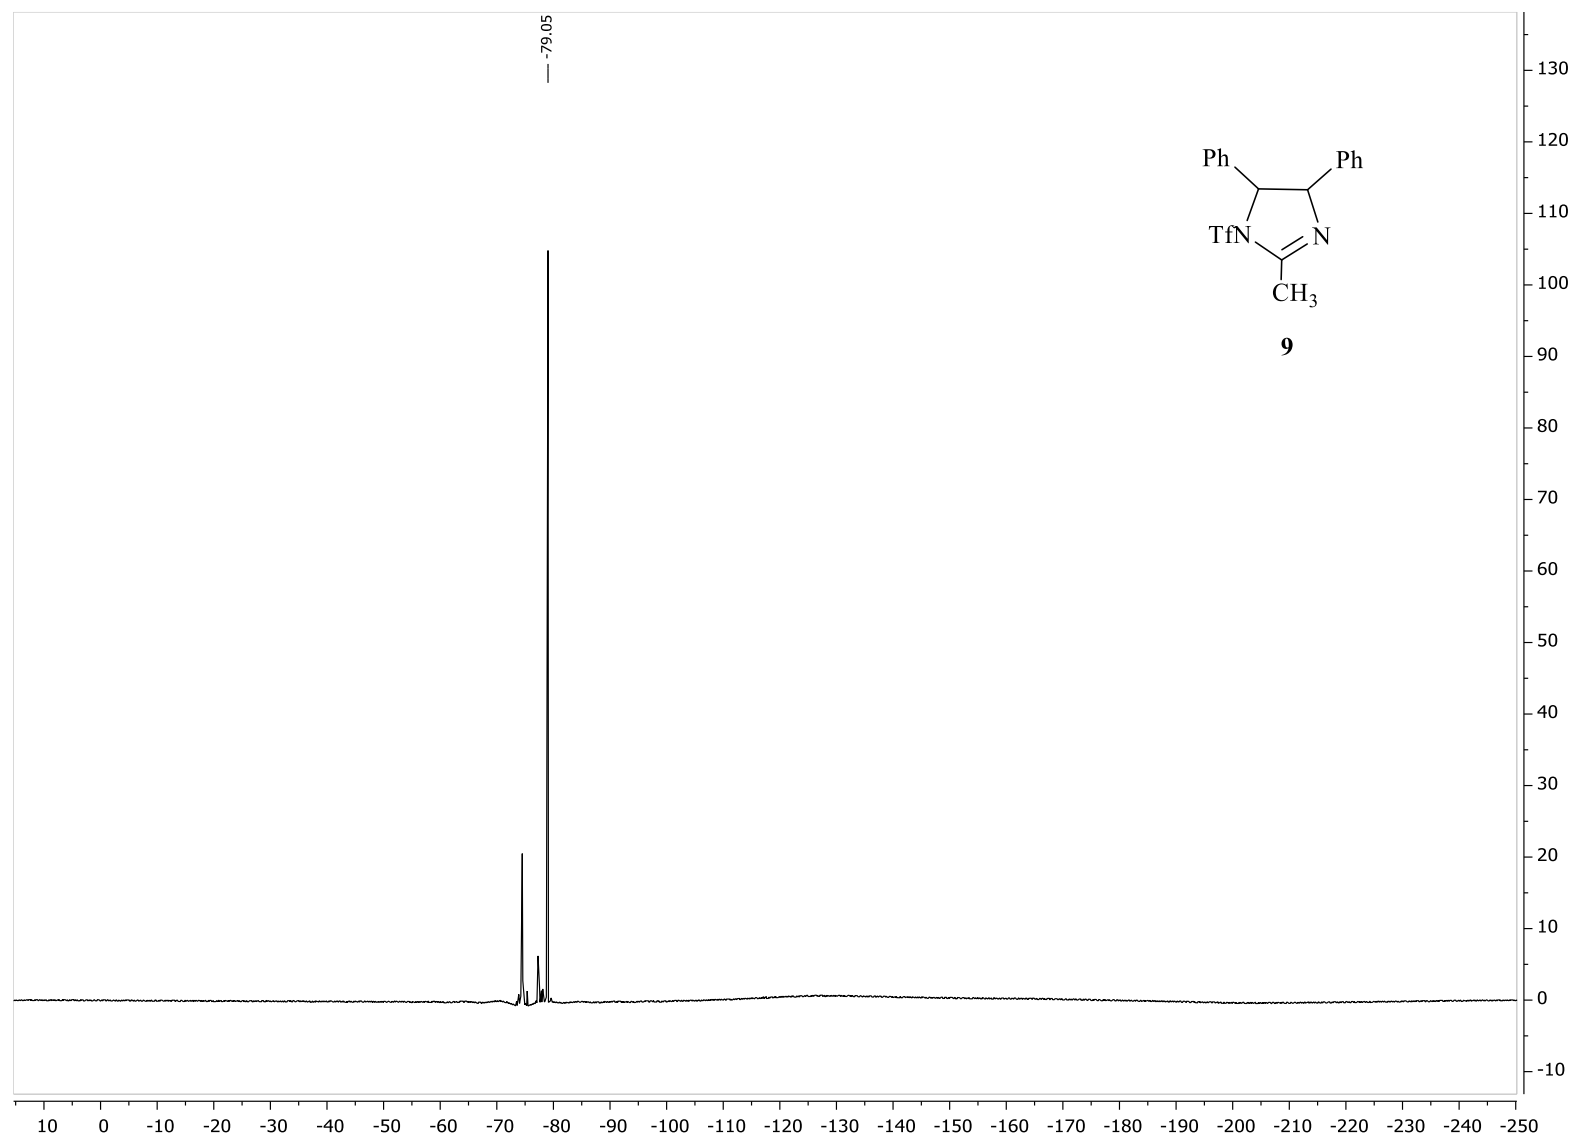

**Figure S13.**  $^1\text{H}$  NMR (400.1 MHz,  $\text{CDCl}_3$ ) of compound **10**

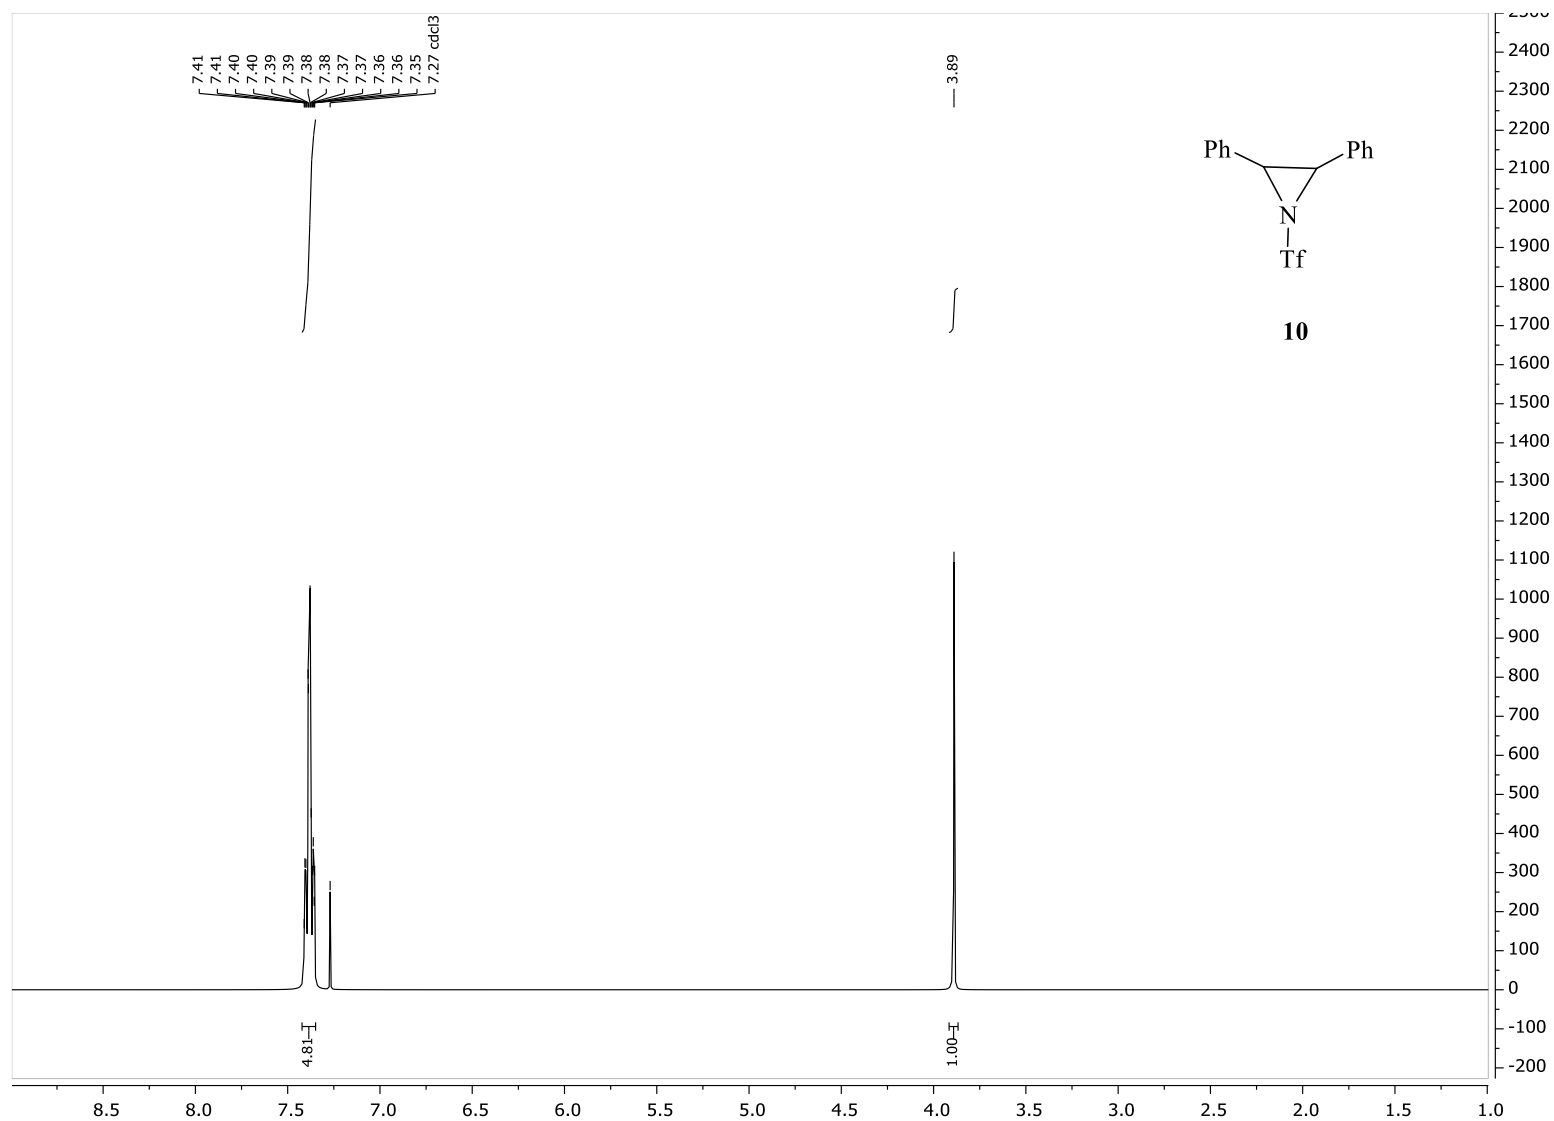

**Figure S14.**  $^{13}\text{C}$  NMR (100.6 MHz,  $\text{CDCl}_3$ ) of compound **10**

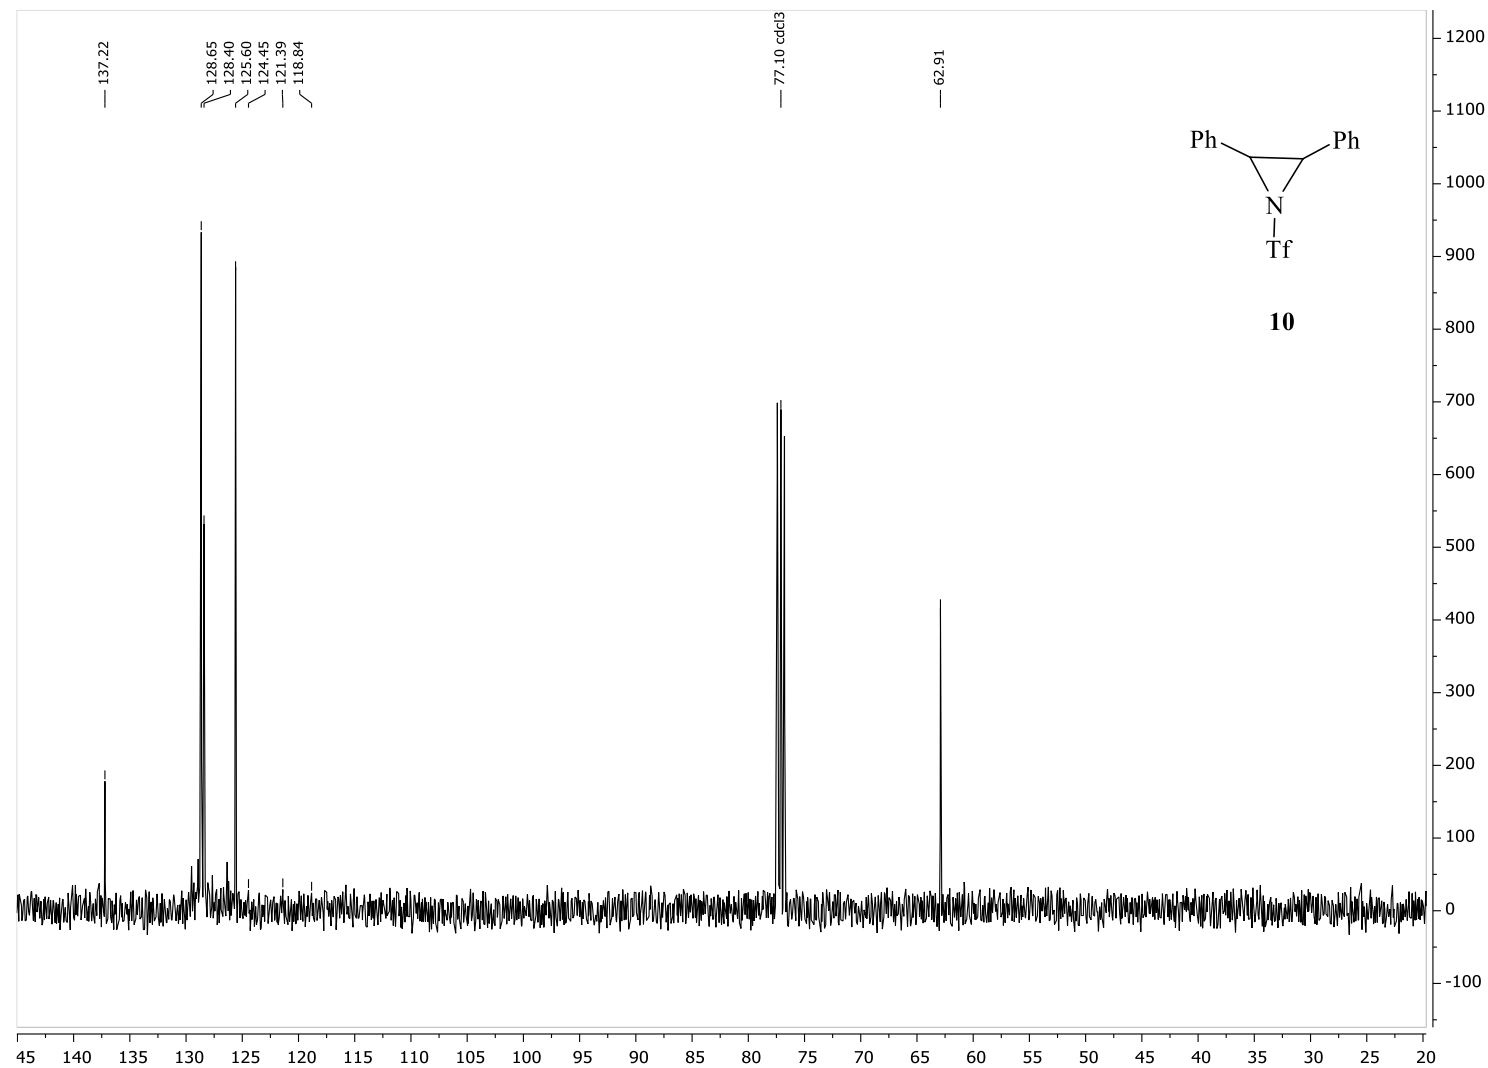

**Figure S15.**  $^{13}\text{C}$  ( $[^{13}\text{C} - ^1\text{H}]$ ) NMR (100.6 MHz,  $\text{CDCl}_3$ ) of compound **10**

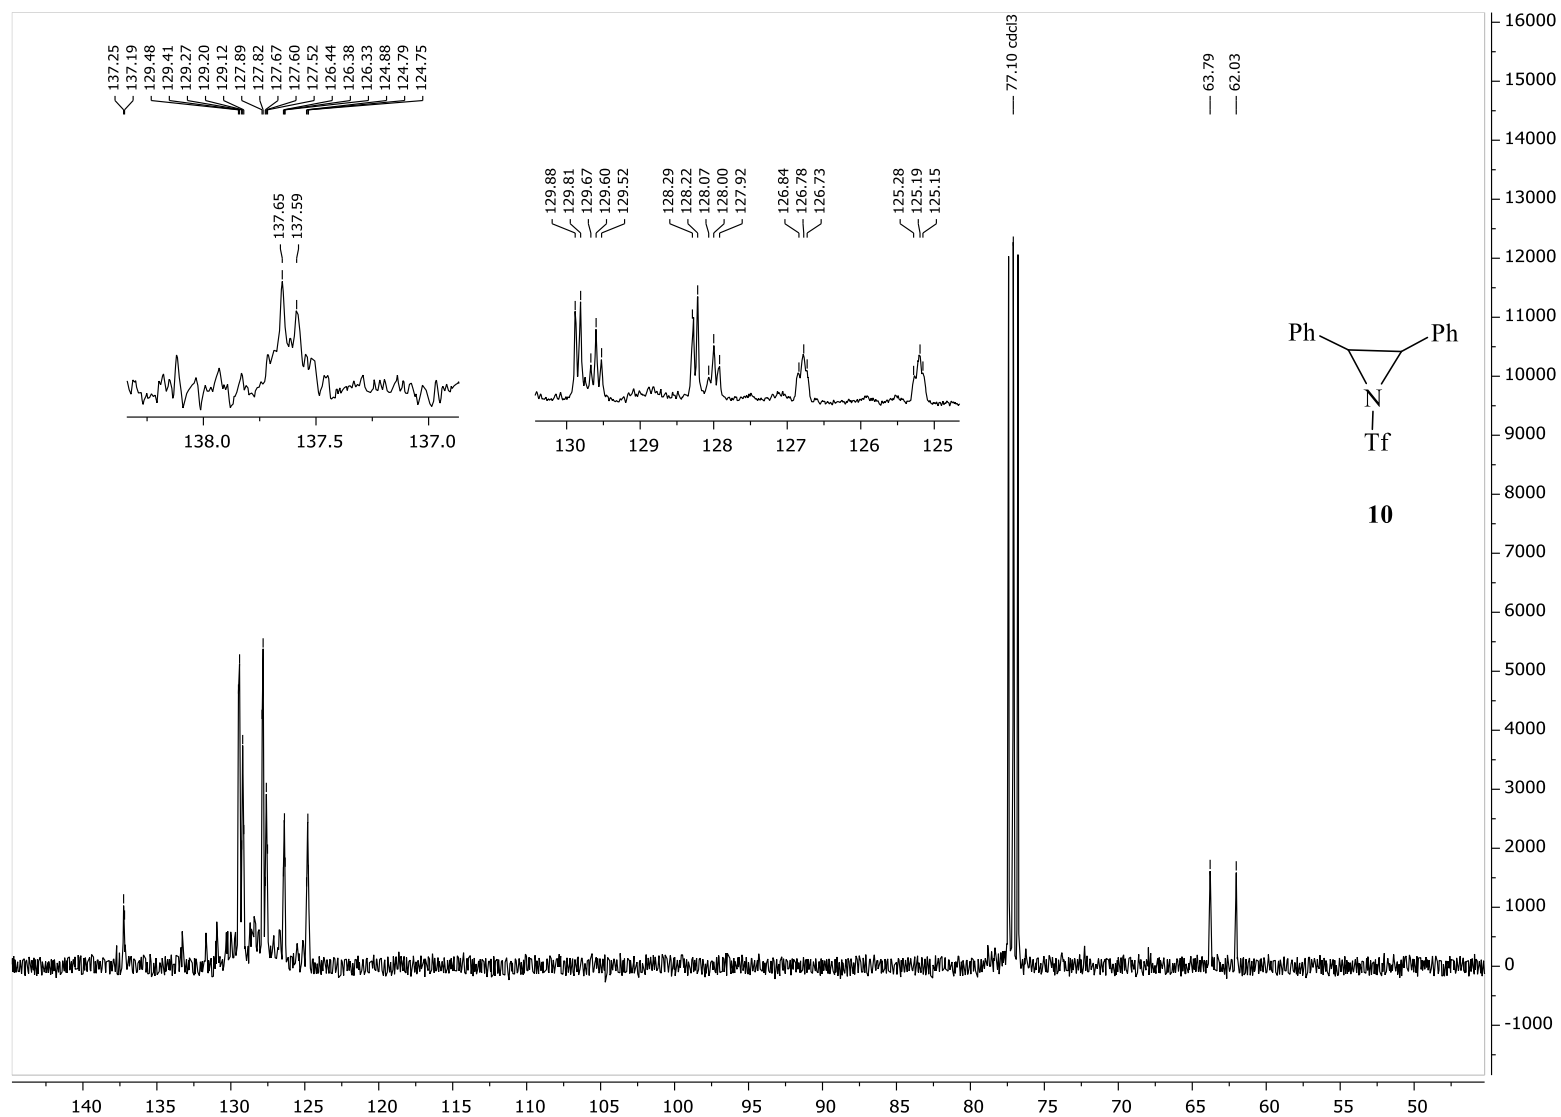



**Figure S16.**  $^{19}\text{F}$  NMR (376 MHz) of compound **10**

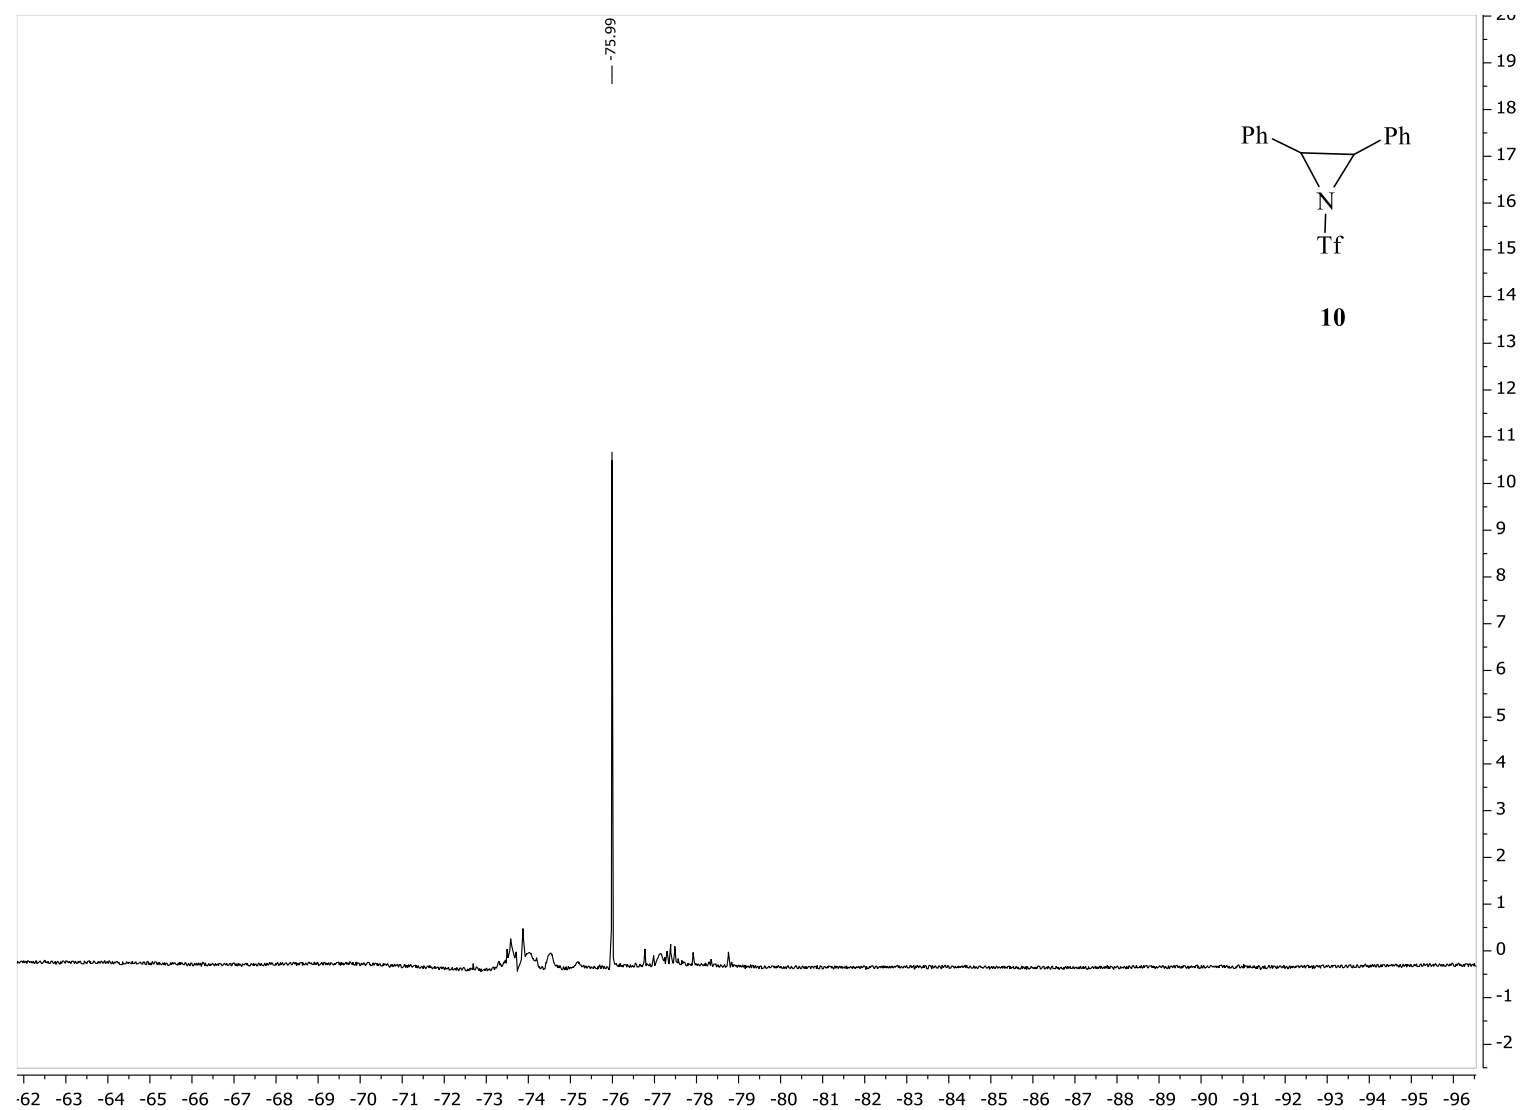

**Figure S17.**  $^1\text{H}$  NMR (400.1 MHz,  $\text{CDCl}_3$ ) of compound **11** (pure)

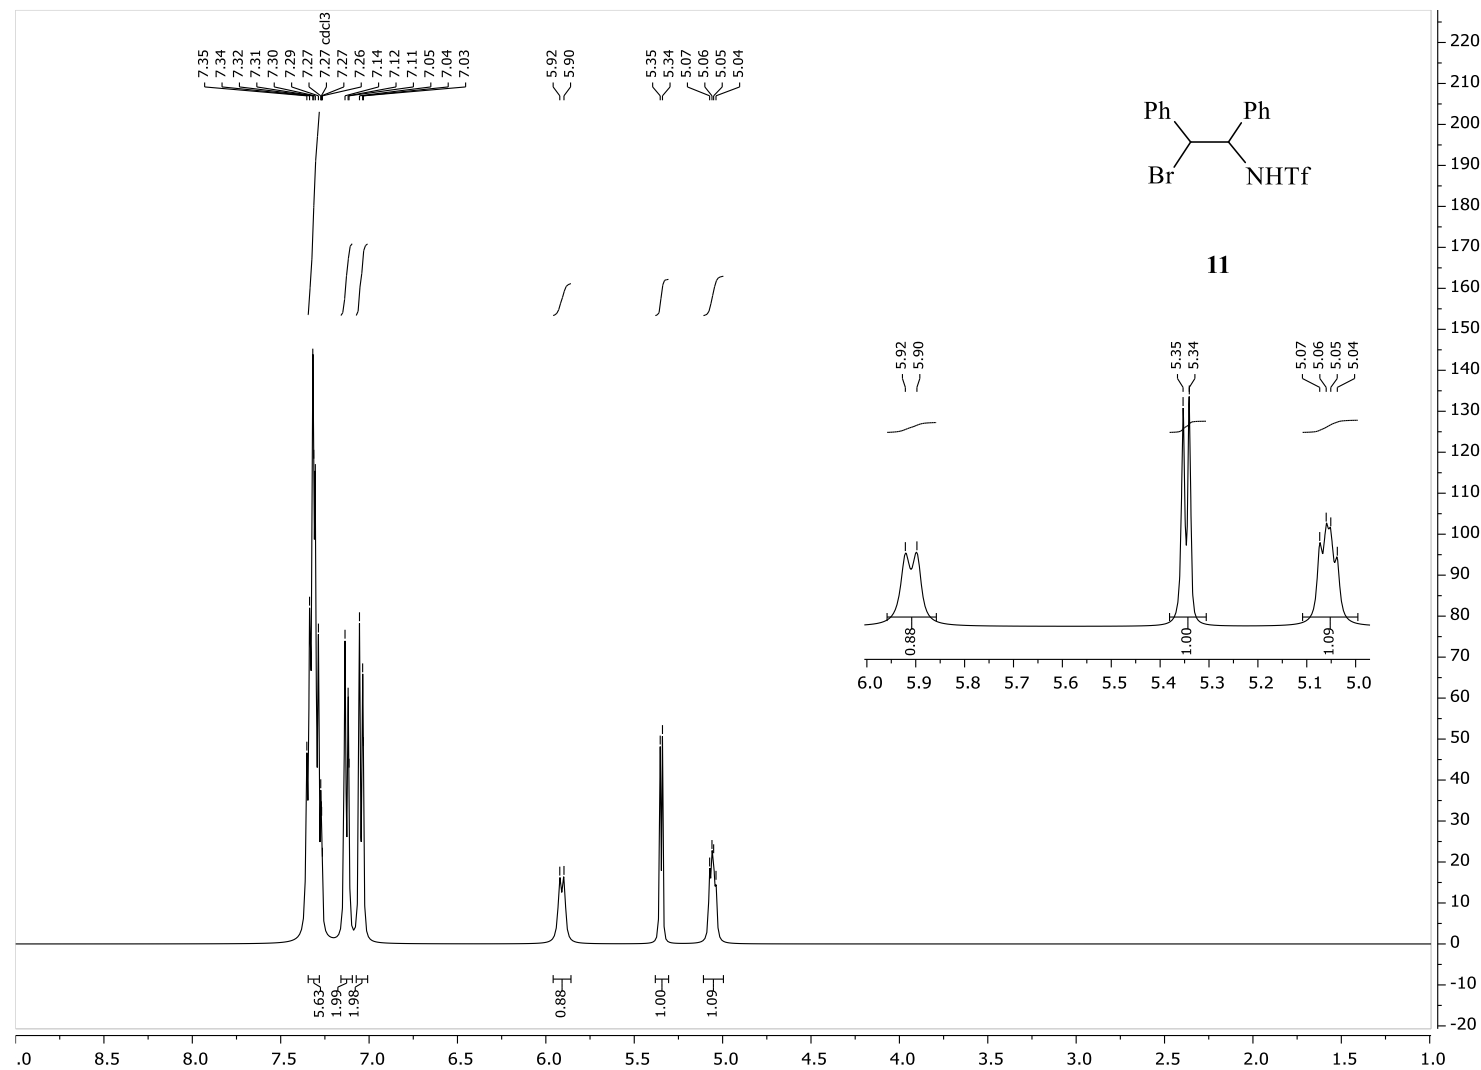

**Figure S18.**  $^1\text{H}$  NMR (400.1 MHz,  $\text{CDCl}_3$ ) of compound **11**

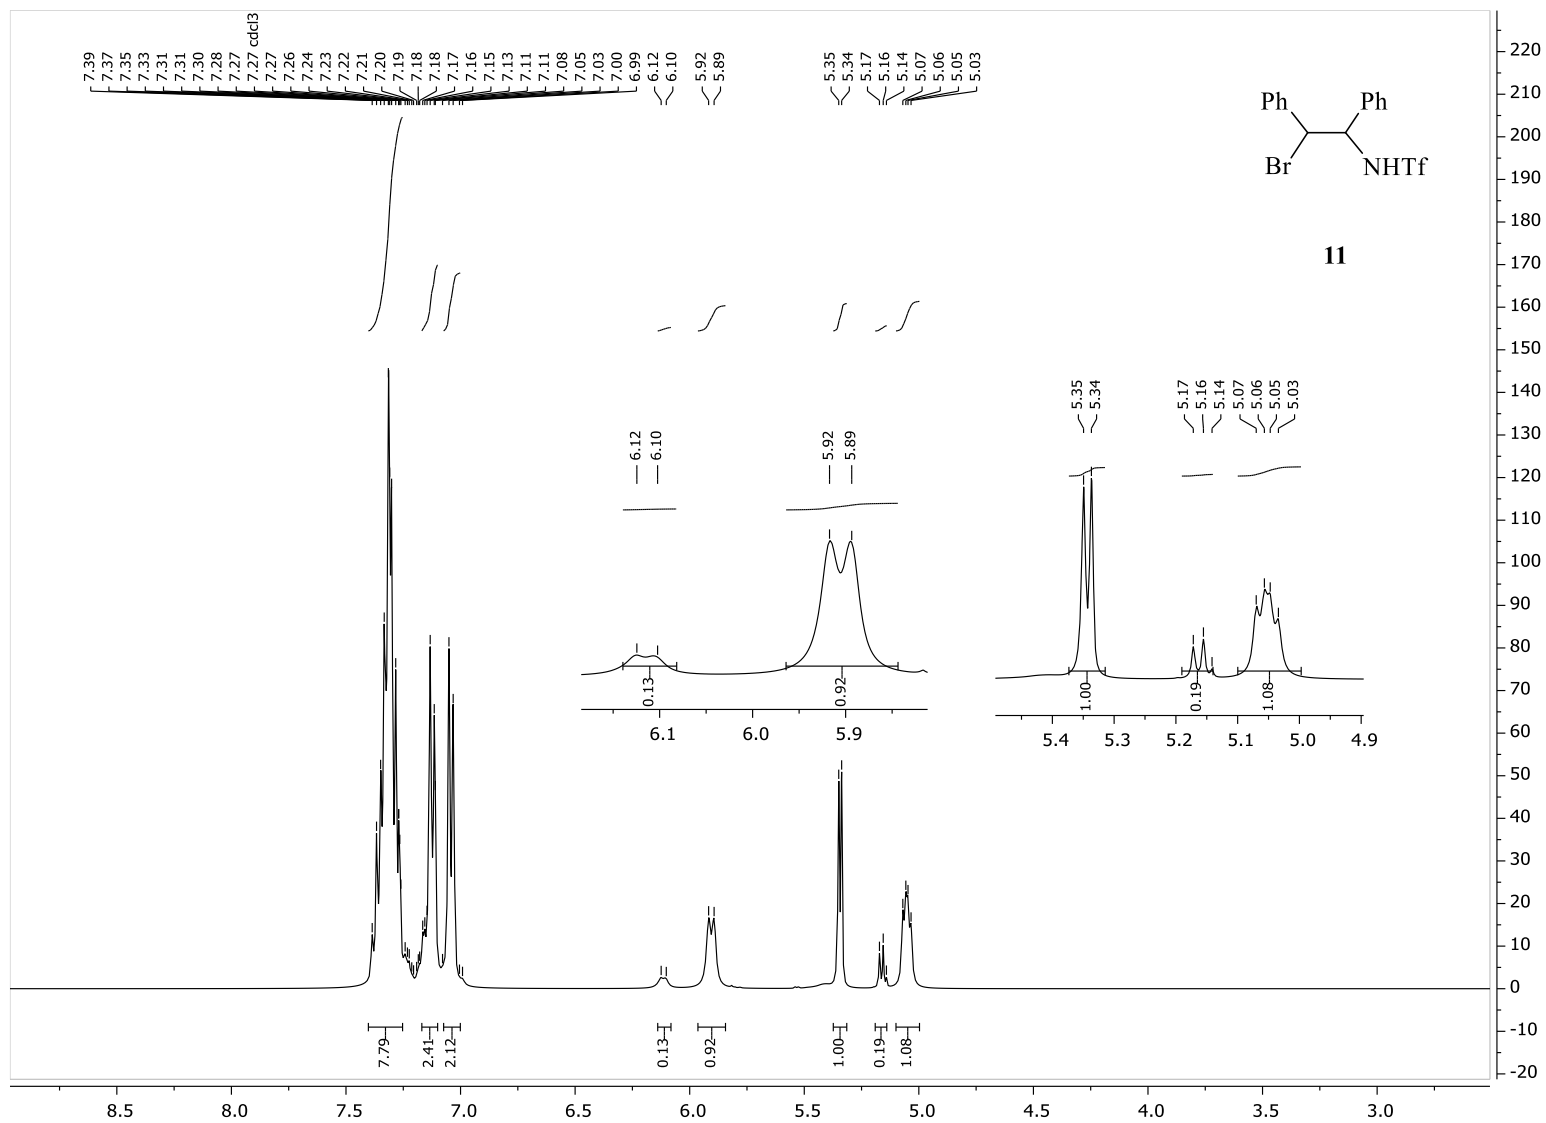

**Figure S19.**  $^{13}\text{C}$  NMR (100.6 MHz,  $\text{CDCl}_3$ ) of compound **11**

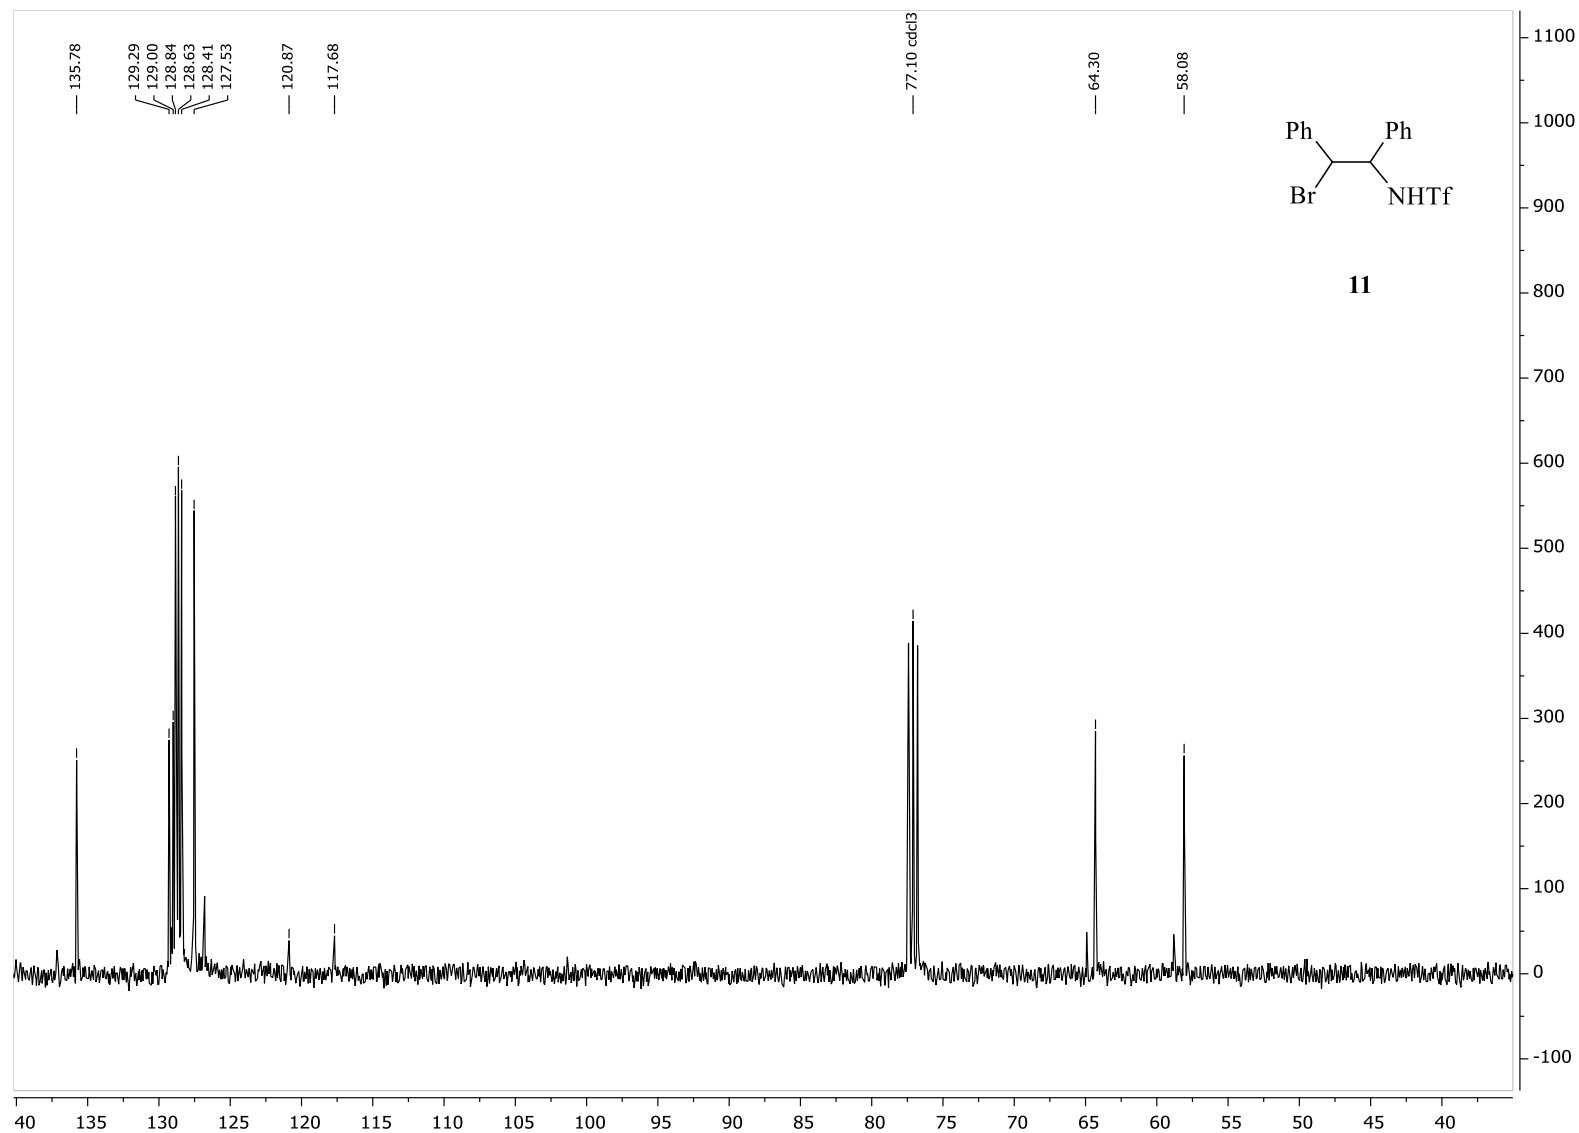

**Figure S20.**  $^{19}\text{F}$  NMR (376 MHz) of compound **11**

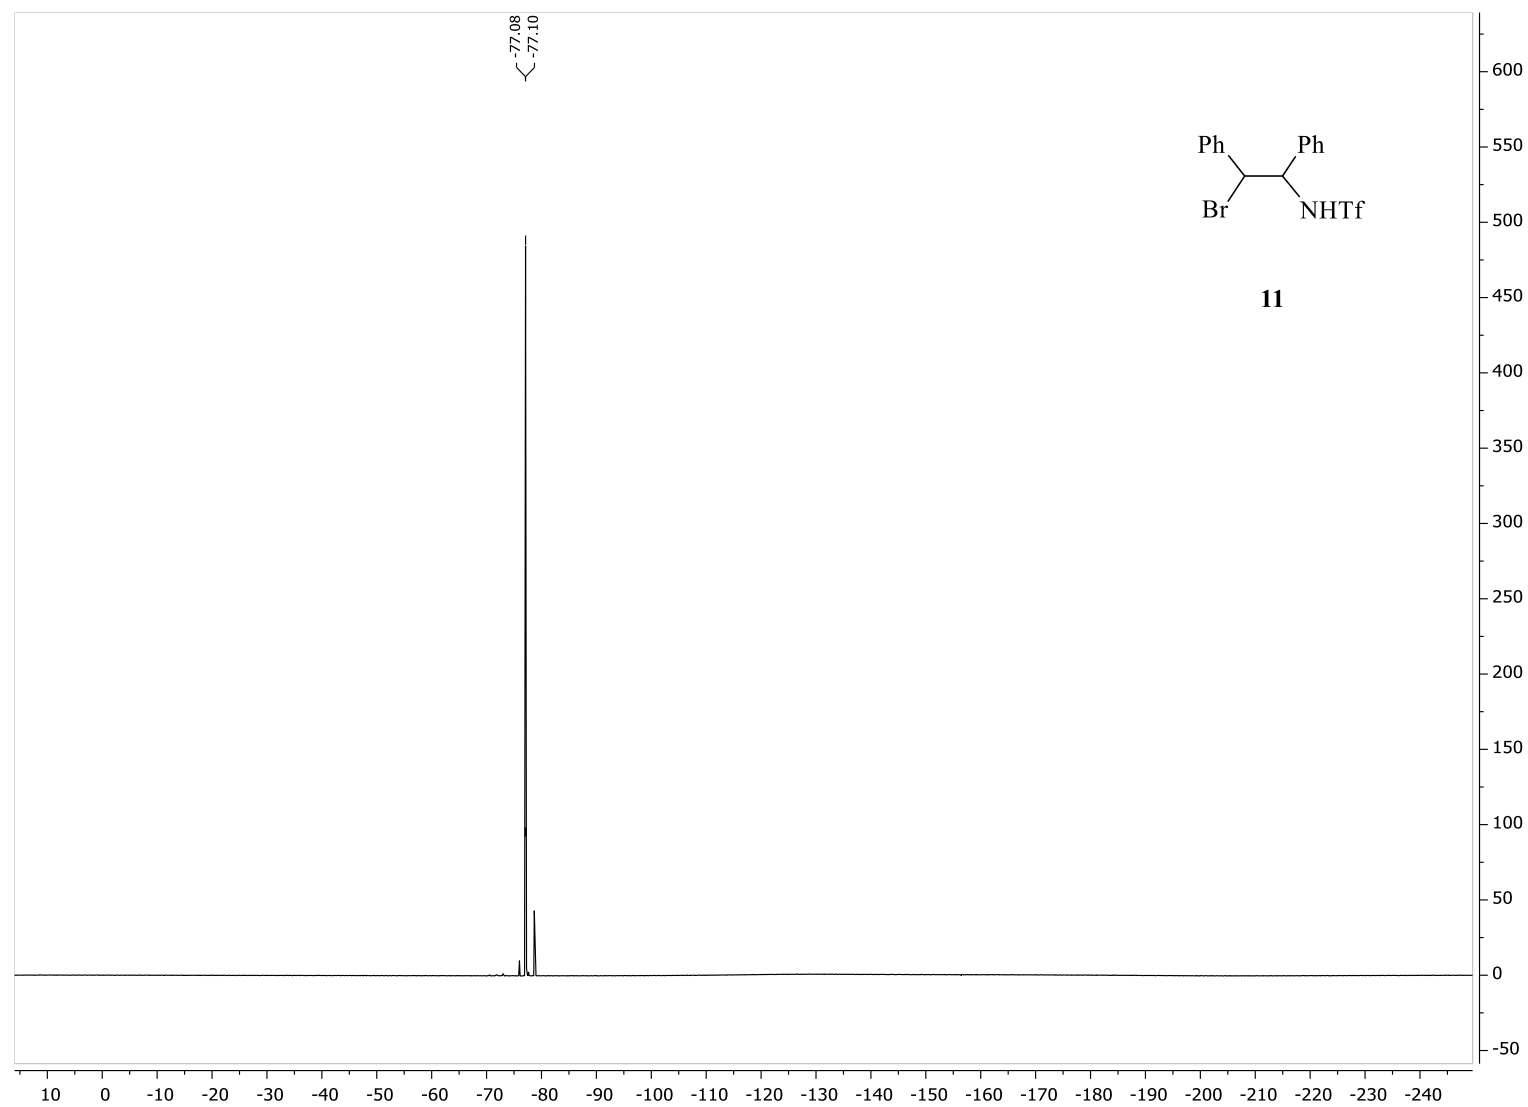

**Figure S21.**  $^1\text{H}$  NMR (400.1 MHz,  $\text{CDCl}_3$ ) of compounds **13** and **14**

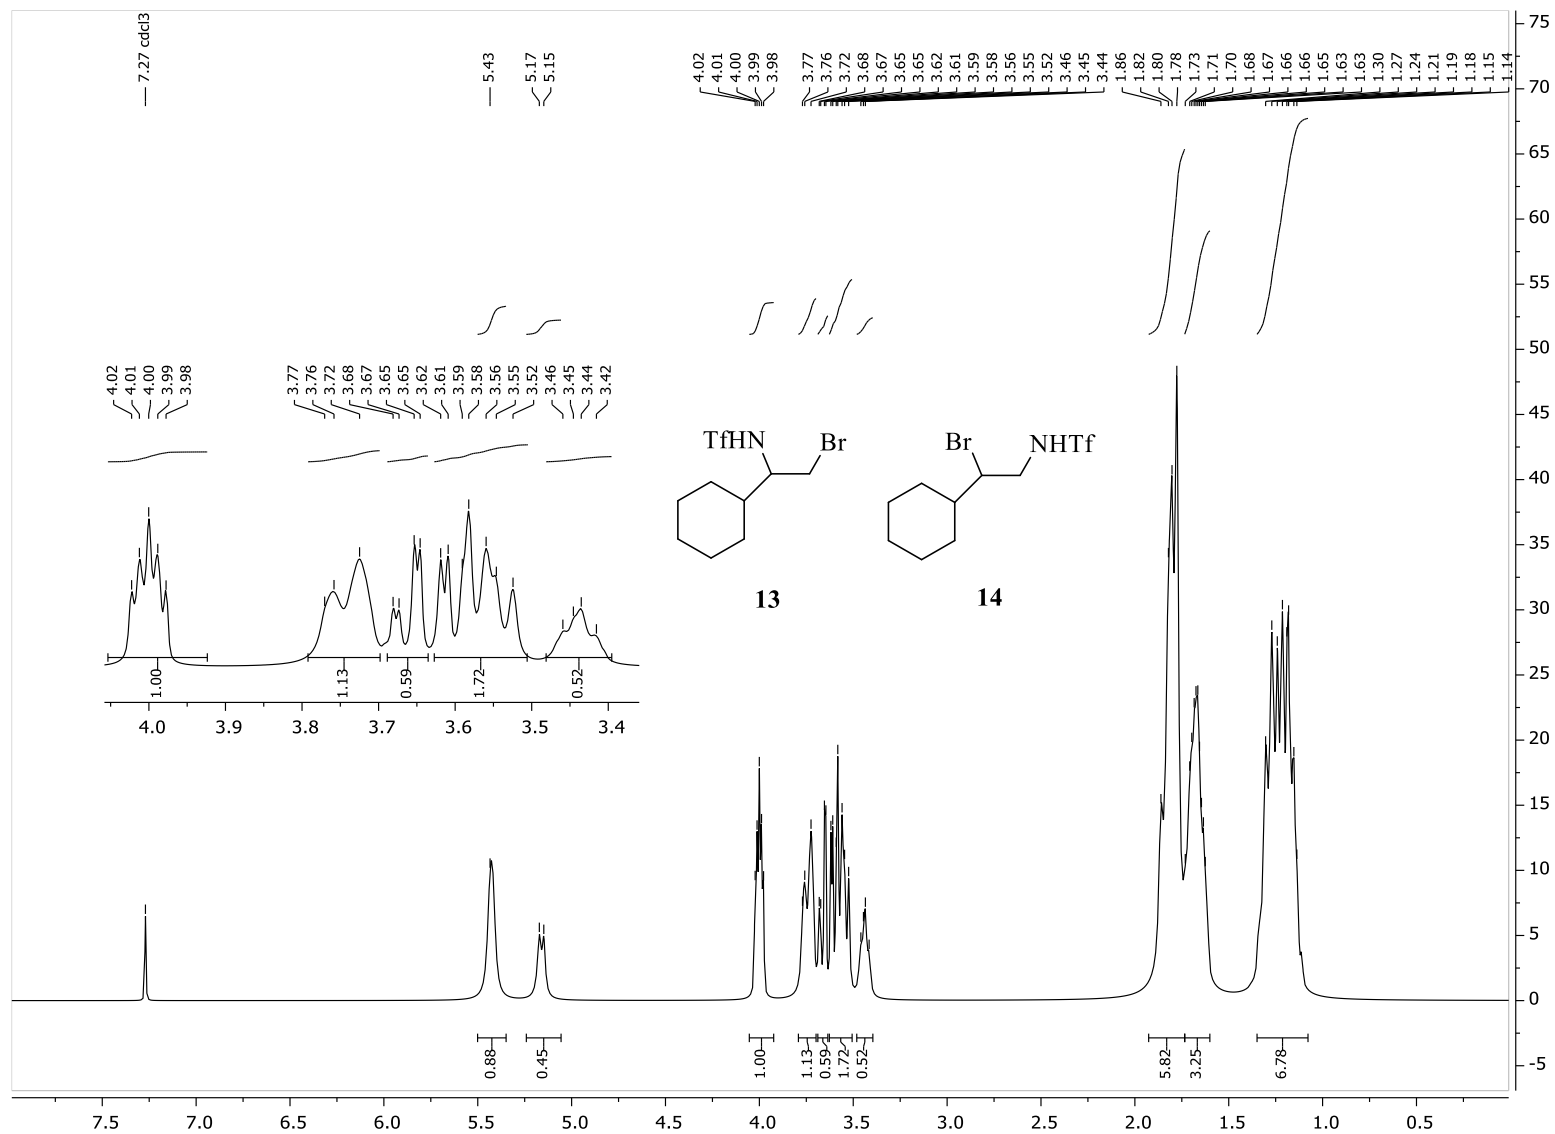

**Figure S22.**  $^{13}\text{C}$  NMR (100.6 MHz,  $\text{CDCl}_3$ ) of compounds **13** and **14**

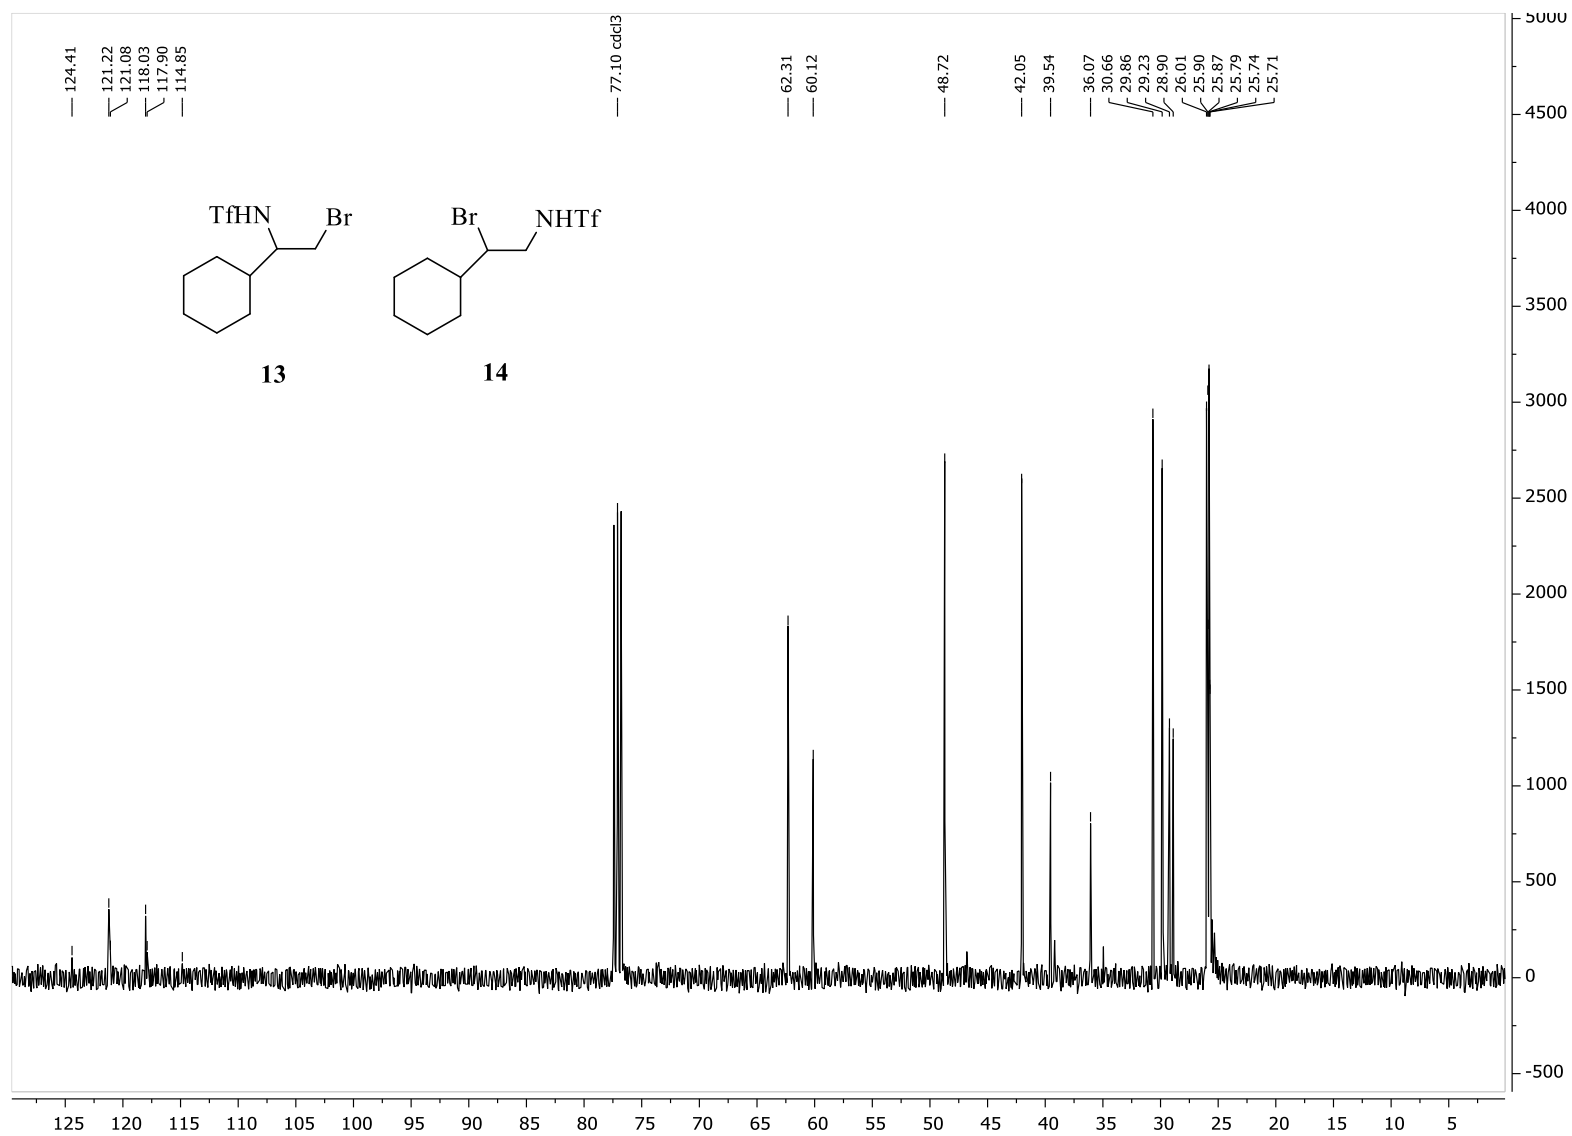

**Figure S23.**  $^{19}\text{F}$  NMR (376 MHz) of compounds **13** and **14**

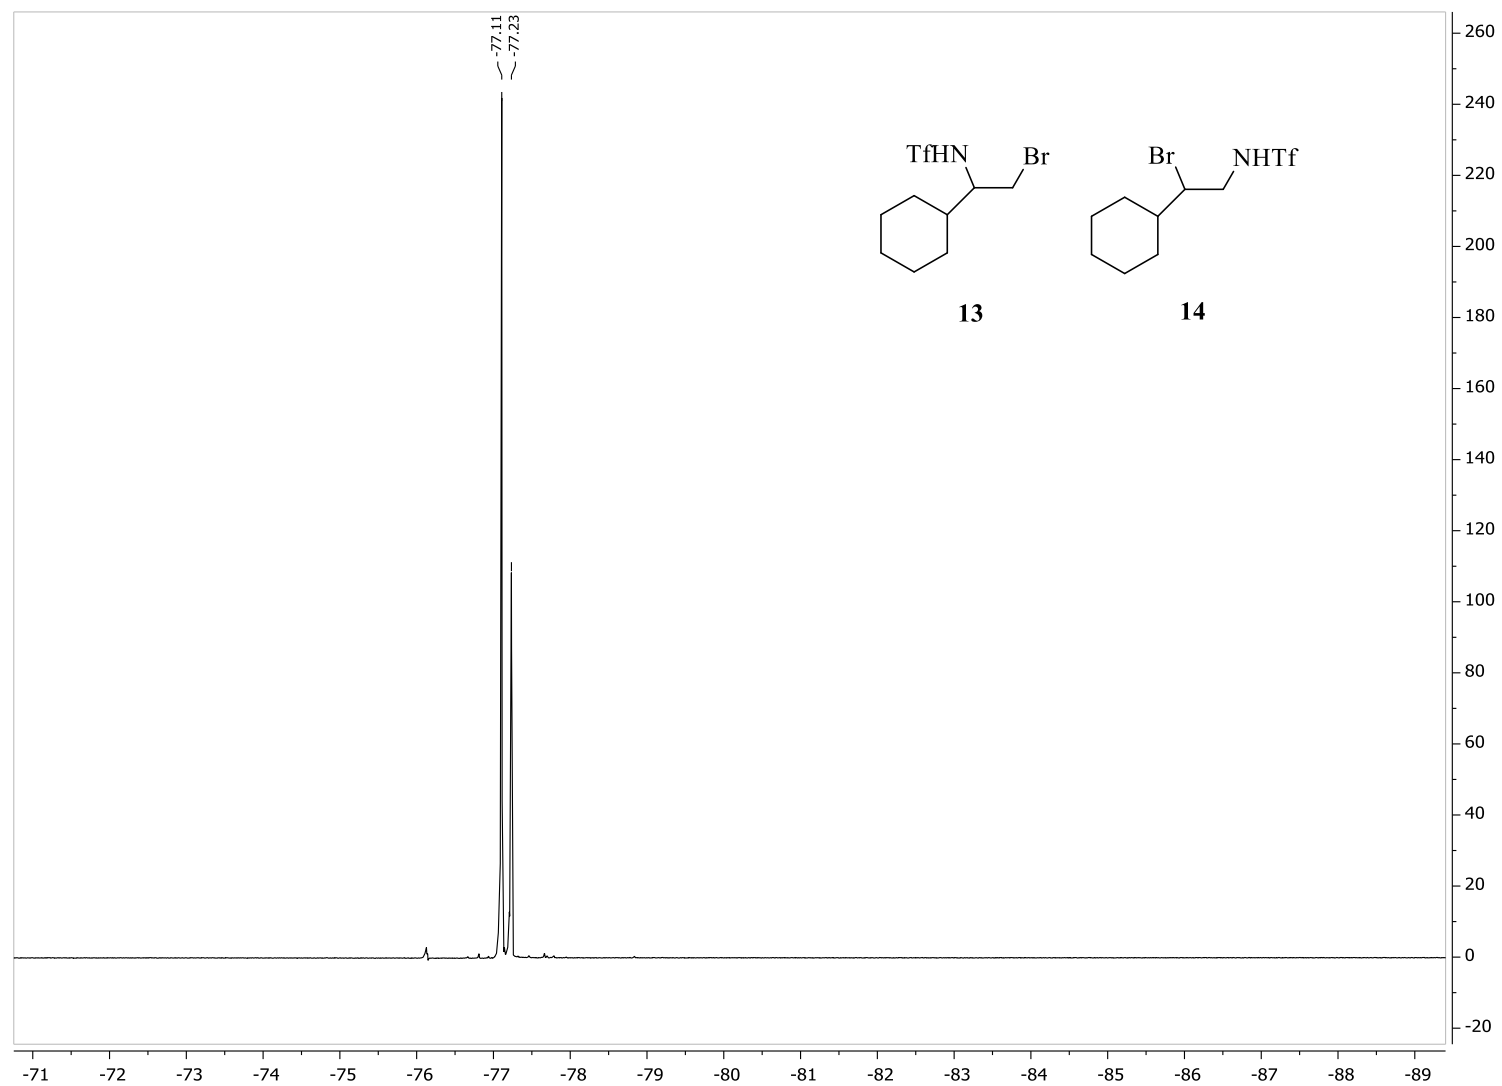



**Figure S24.**  $^1\text{H}$  NMR (400.1 MHz,  $\text{CDCl}_3$ ) of compound **14**

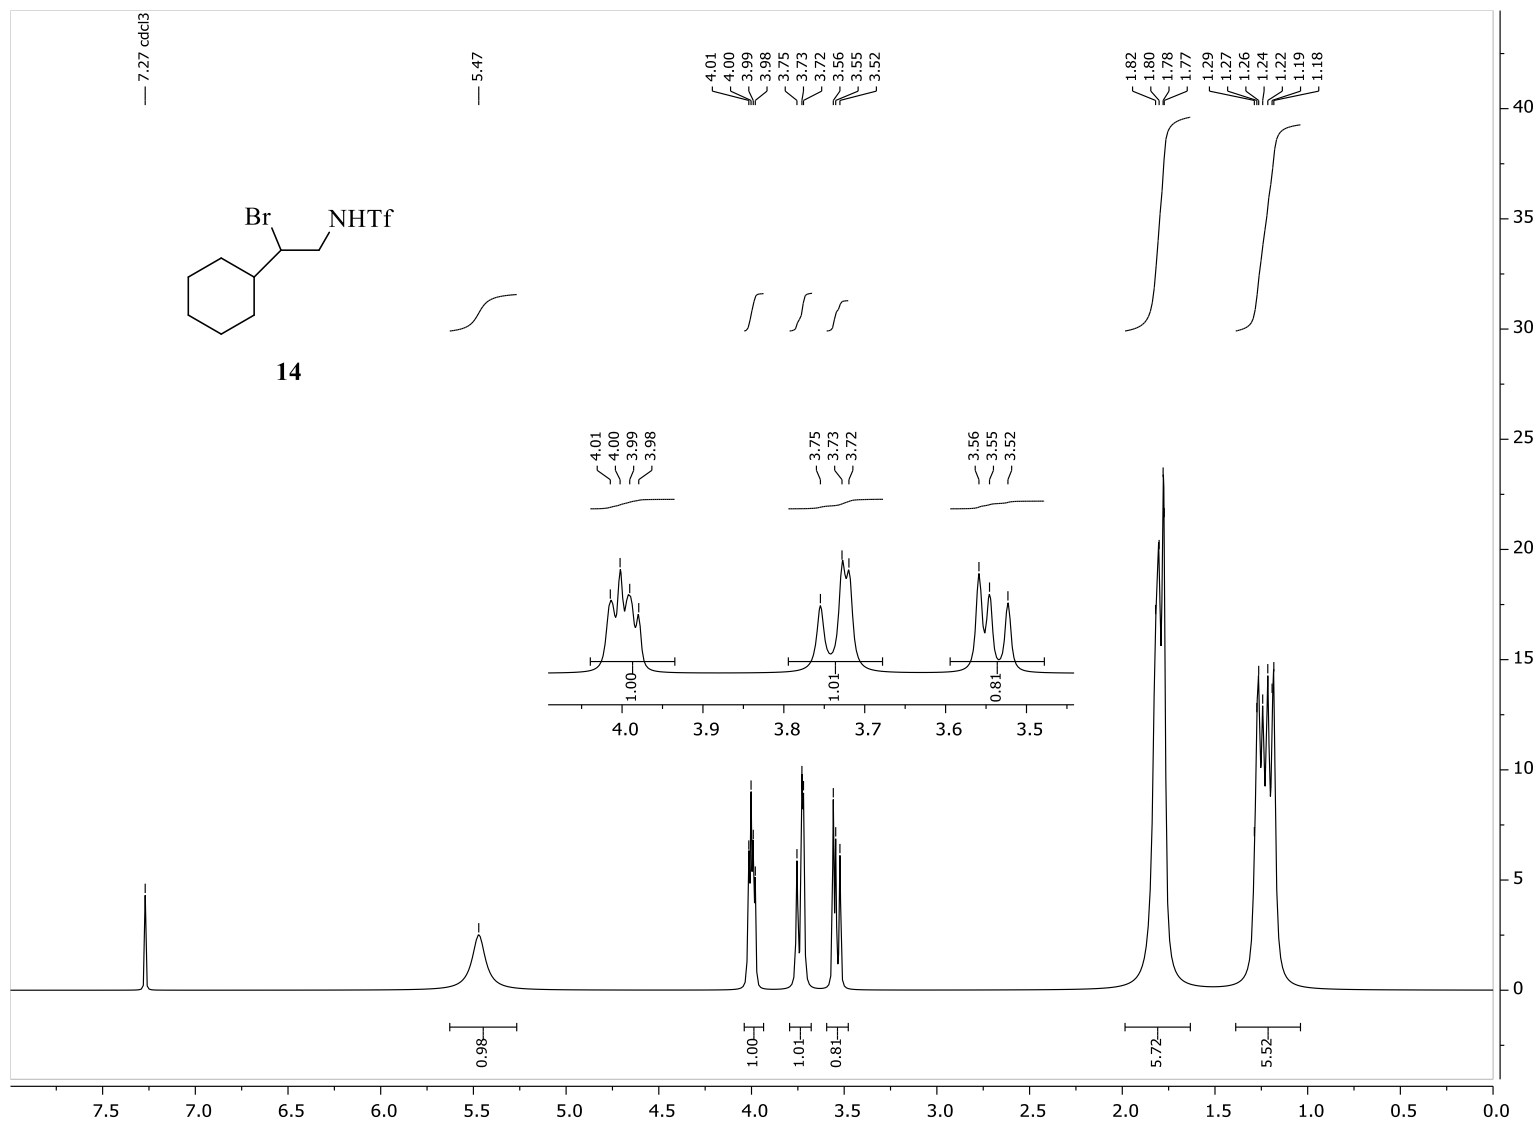

**Figure S25.**  $^{13}\text{C}$  NMR (100.6 MHz,  $\text{CDCl}_3$ ) of compound **14**

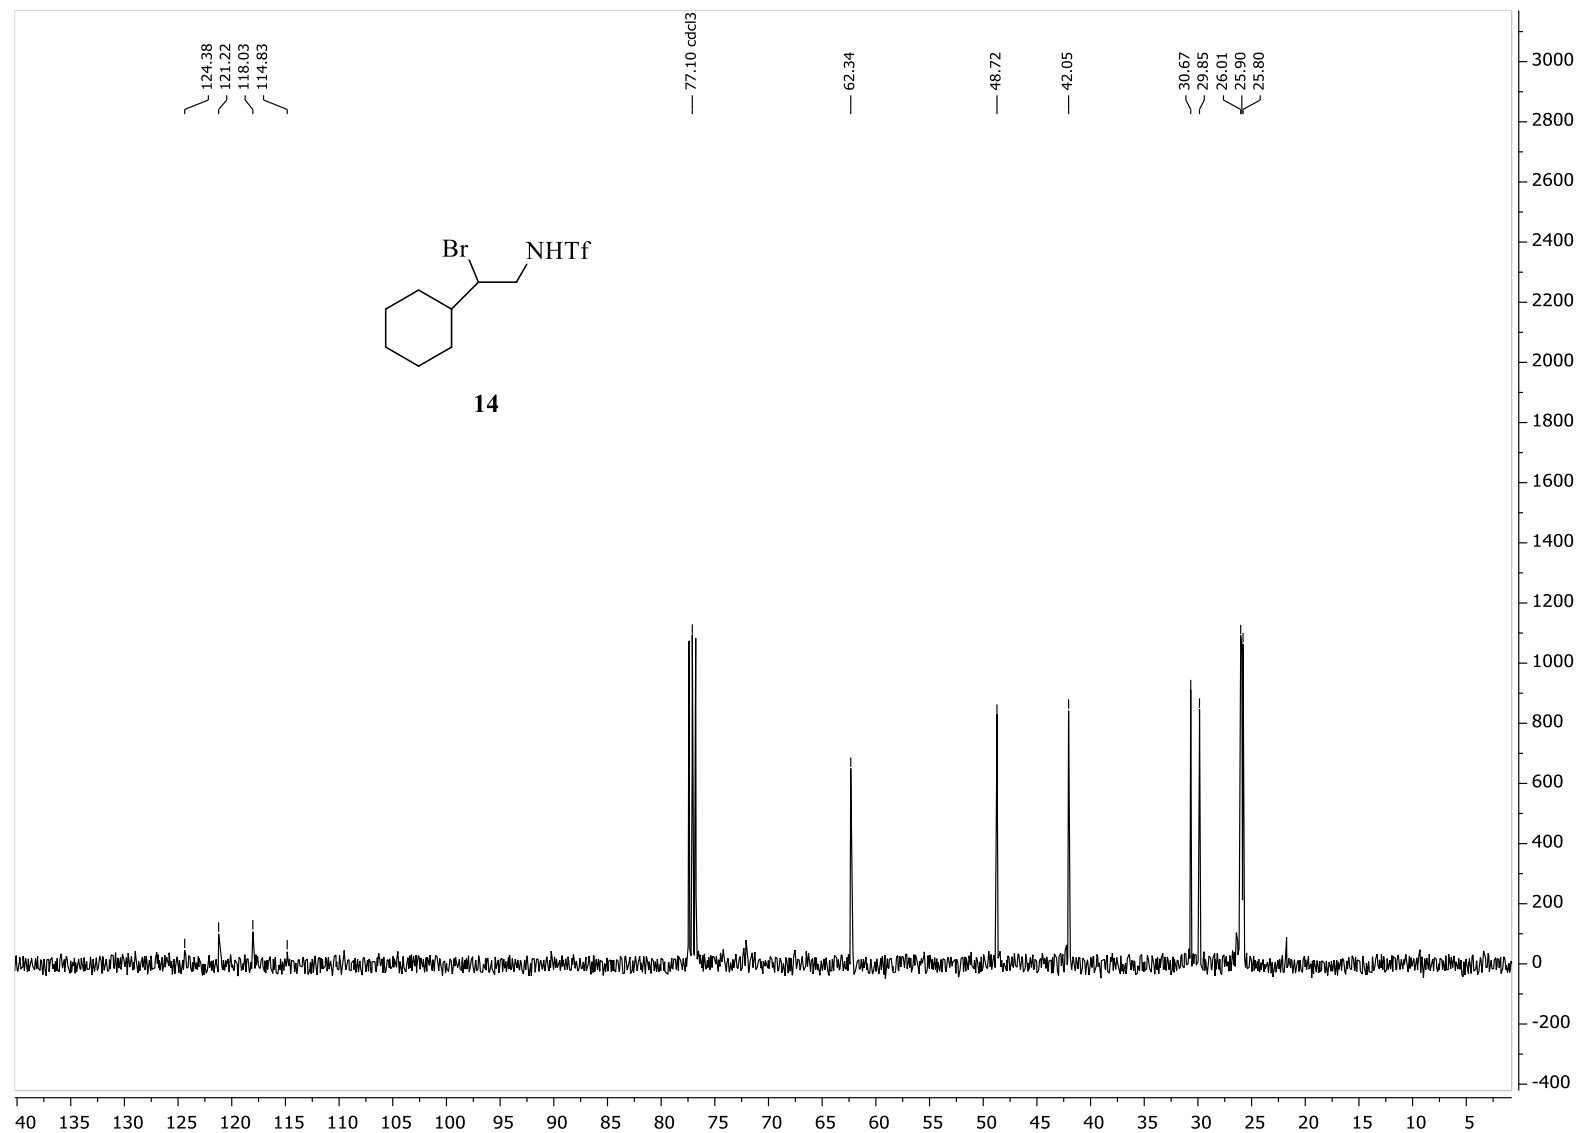

**Figure S26.**  $^1\text{H}$  NMR (400.1 MHz,  $\text{CDCl}_3$ ) of compounds **15** and **16**

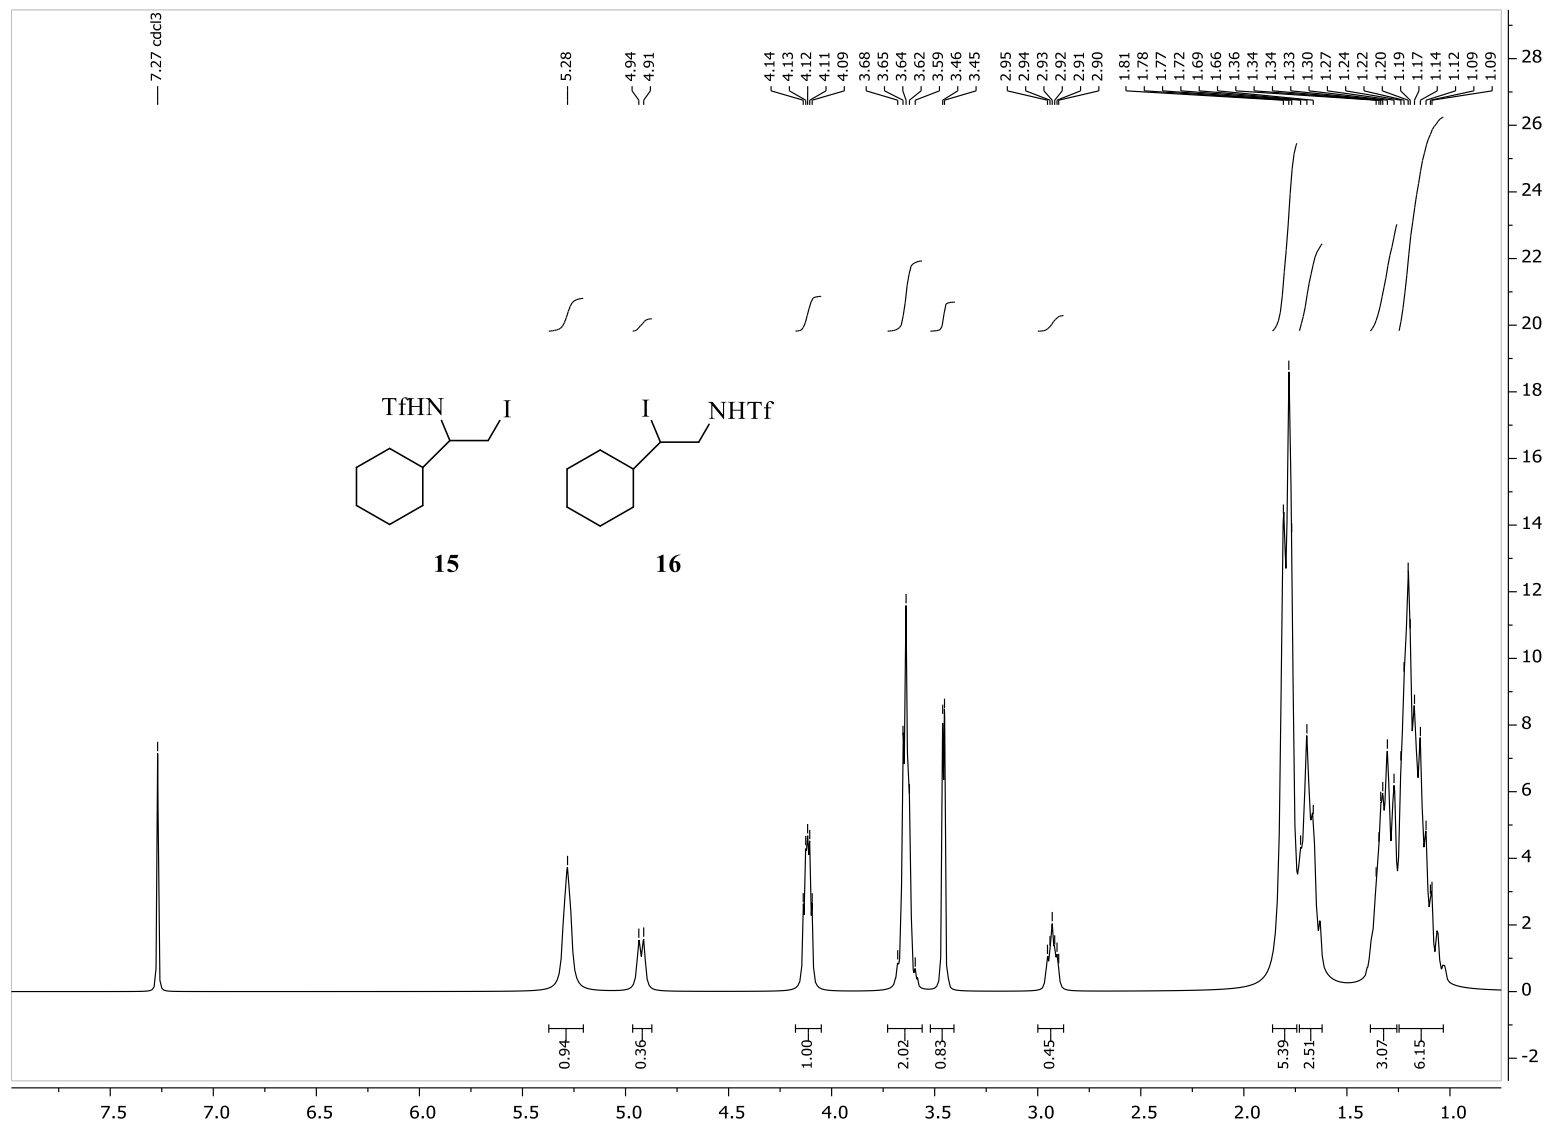

**Figure S27.**  $^{13}\text{C}$  NMR (100.6 MHz,  $\text{CDCl}_3$ ) of compounds **15** and **16**

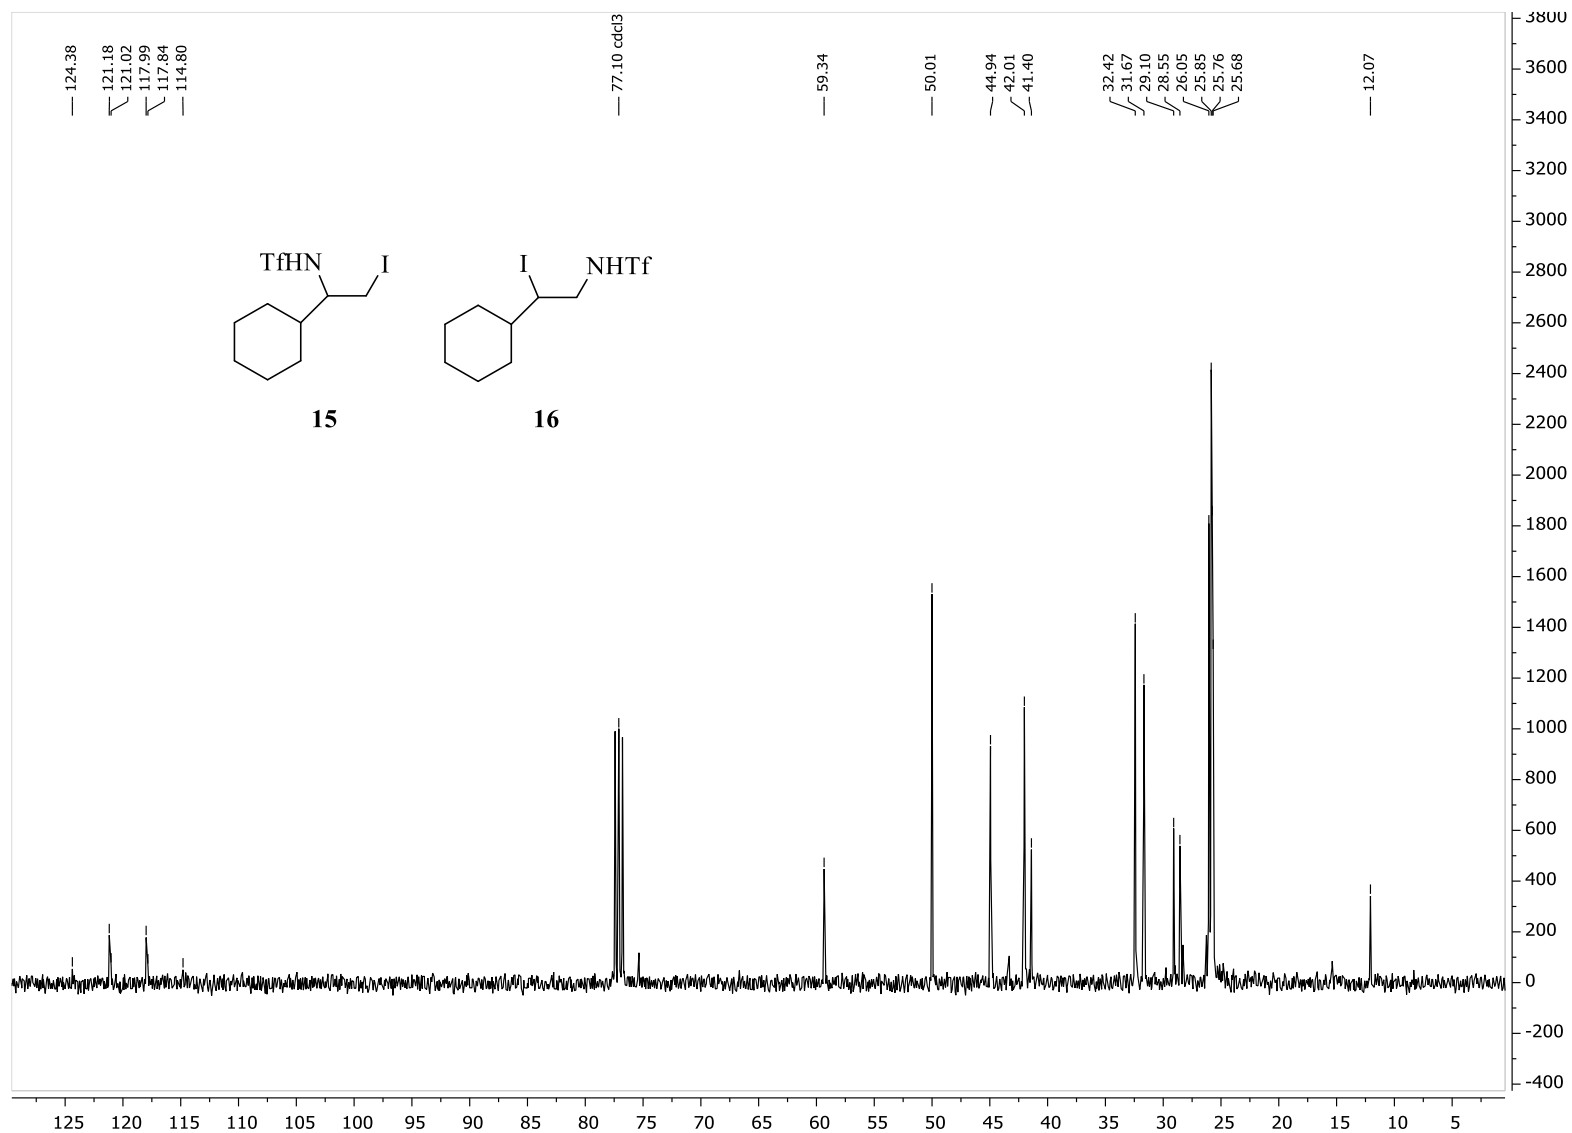

**Figure S28.**  $^{19}\text{F}$  NMR (376 MHz) of compounds **15** and **16**

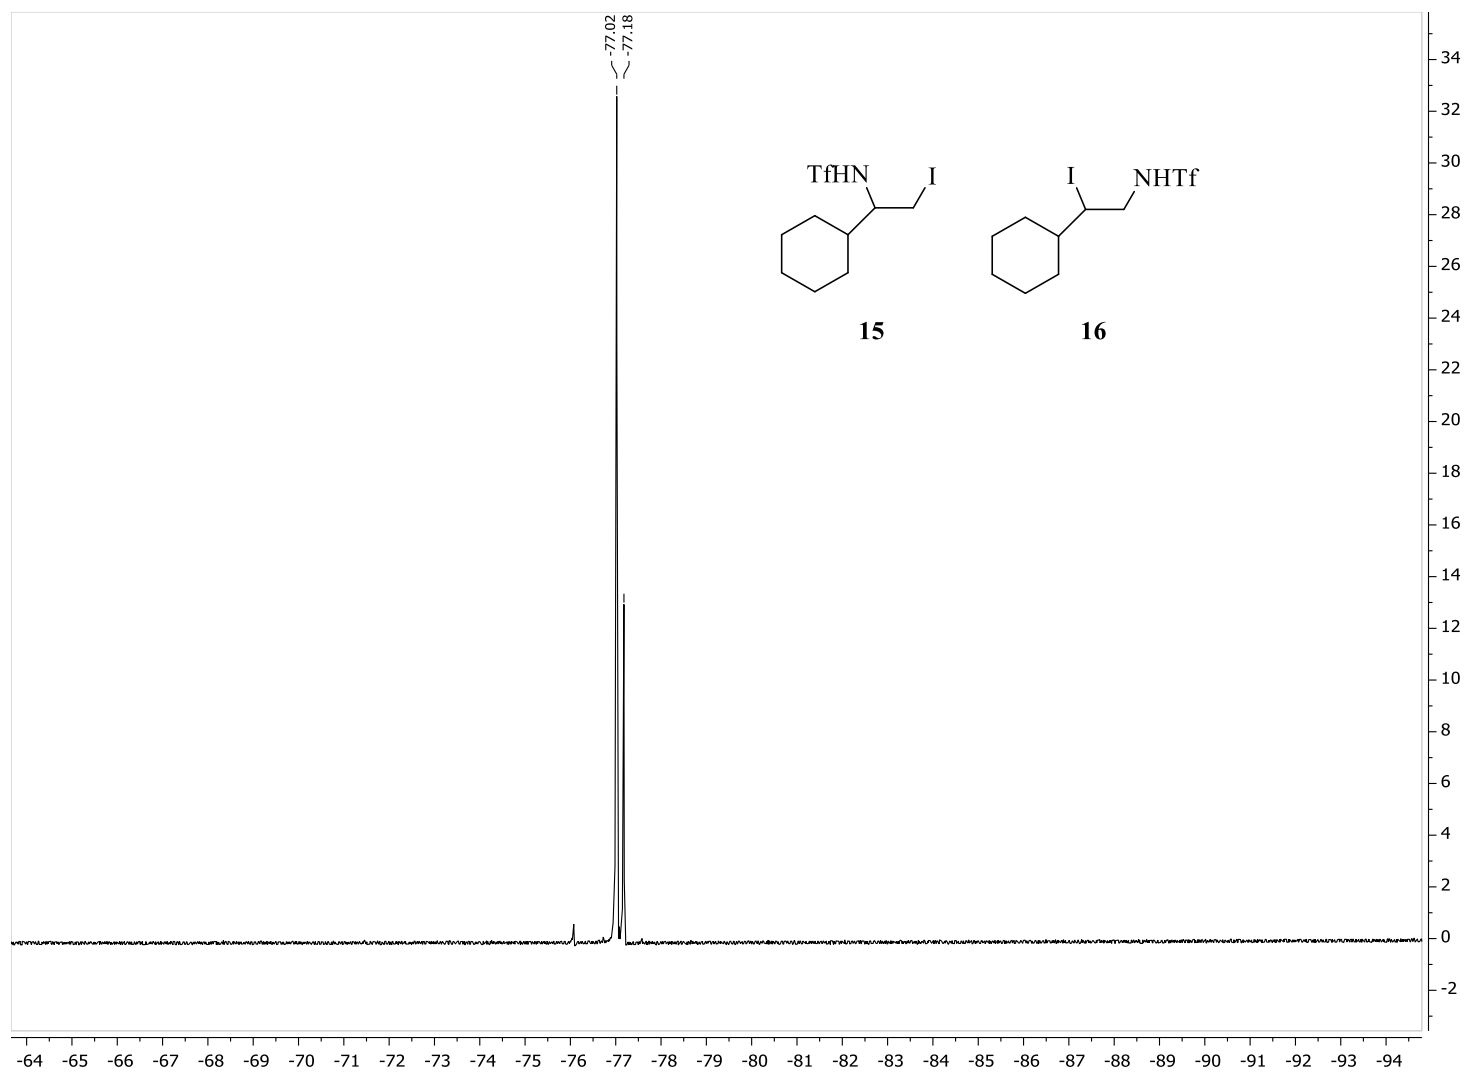

**Chemical Structure of 18:** CC(=Nc1ccccc1)C(CI)C2CCCCC2

**1H NMR Spectrum (CDCl<sub>3</sub>):**

**Peak List (ppm):** 7.27, 7.01, 7.00, 6.66, 6.64, 4.25, 4.24, 4.23, 4.22, 4.21, 4.11, 4.10, 4.09, 4.08, 3.94, 3.93, 3.92, 3.91, 3.90, 3.89, 3.88, 3.87, 3.75, 3.74, 3.73, 3.72, 3.72, 3.71, 3.70, 3.69, 3.64, 3.63, 3.62, 3.61, 3.59, 3.58, 3.57, 3.47, 3.46, 3.45, 3.44, 3.33, 3.32, 3.31, 3.29, 3.29, 1.79, 1.78, 1.75, 1.72, 1.69, 1.68, 1.68, 1.65, 1.64, 1.36, 1.35, 1.32, 1.32, 1.31, 1.30, 1.29, 1.28, 1.27, 1.26, 1.25, 1.24, 1.22, 1.21, 1.19, 1.16, 1.14, 1.13, 1.10, 1.09.

**Integration Values:** 0.91, 0.85, 1.00, 0.37, 1.14, 1.02, 1.09, 1.12, 1.01, 5.70, 14.26, 12.82.

**Inset Spectrum (3.2-4.3 ppm):**

**Peak List (ppm):** 4.25, 4.24, 4.23, 4.22, 4.21, 3.93, 3.92, 3.91, 3.90, 3.89, 3.88, 3.87, 3.73, 3.72, 3.72, 3.71, 3.64, 3.63, 3.62, 3.61, 3.59, 3.47, 3.46, 3.45, 3.44, 3.33, 3.32, 3.31, 3.29.

**Integration Values (Inset):** 1.00, 0.37, 1.14, 0.02, 0.09, 1.12, 0.01.

**Figure S30.**  $^{13}\text{C}$  NMR (100.6 MHz,  $\text{CDCl}_3$ ) of compounds **17** and **18**

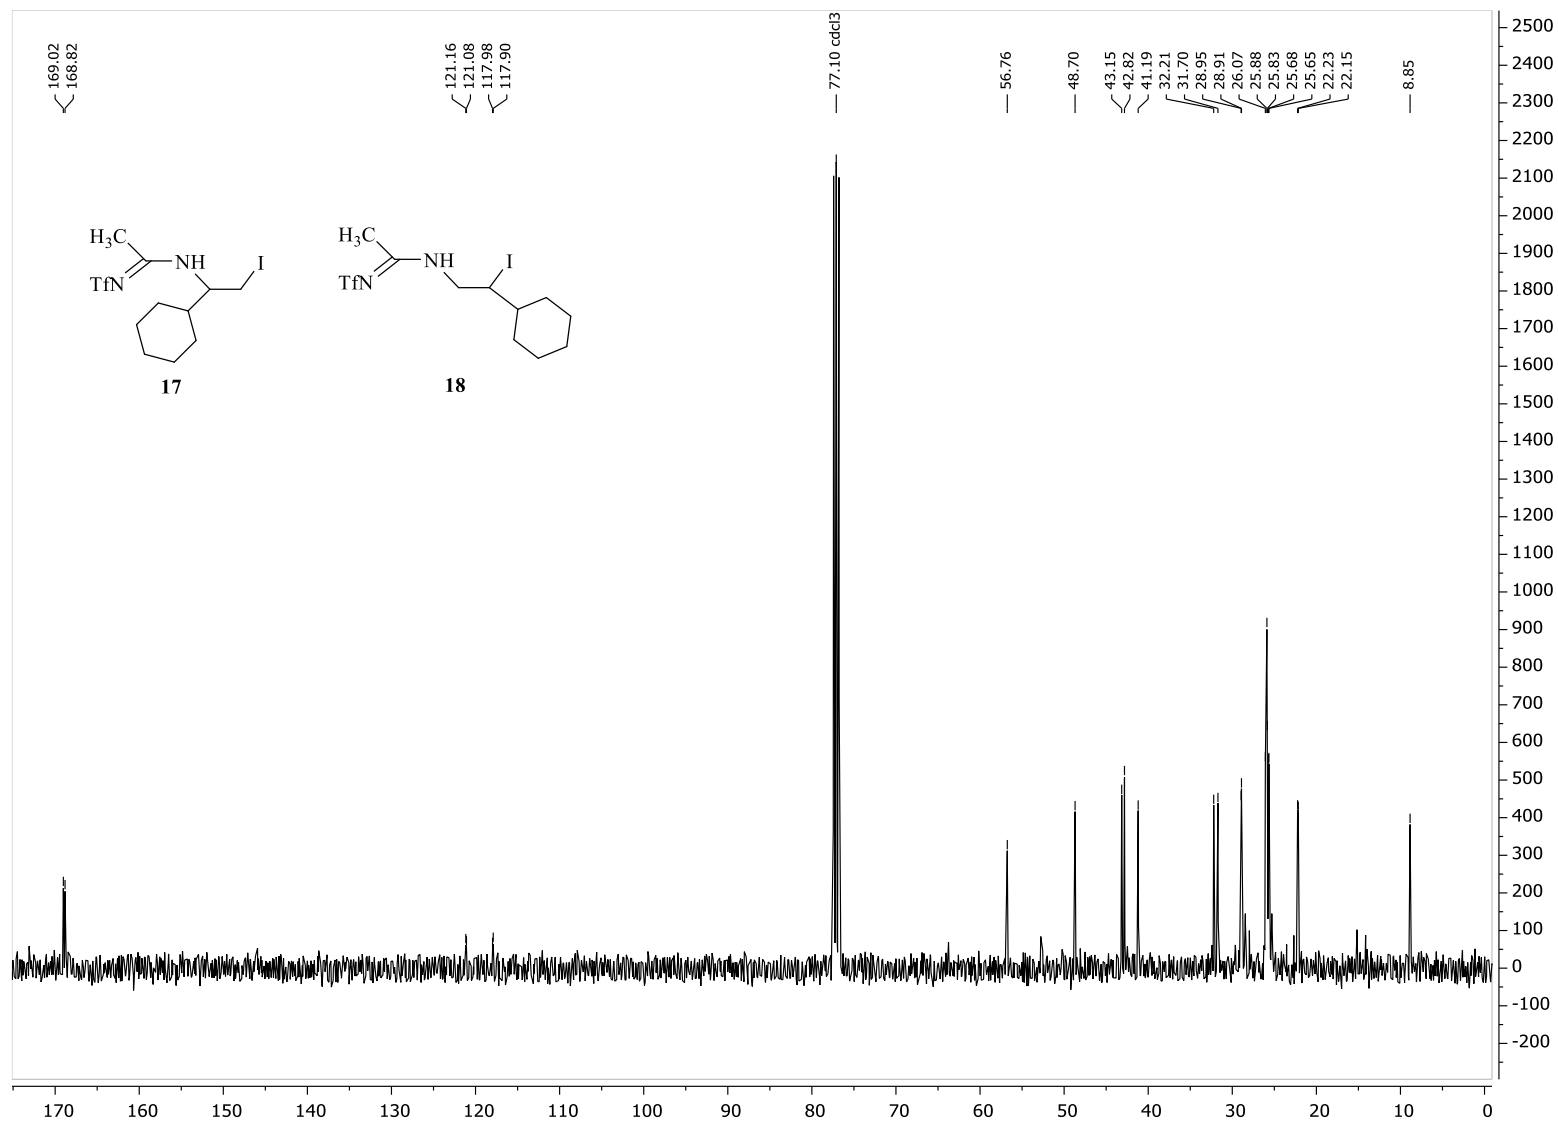

**Figure S31.**  $^{13}\text{C}$  J-modulation NMR (100.6 MHz,  $\text{CDCl}_3$ ) spectrum of **17** and **18**

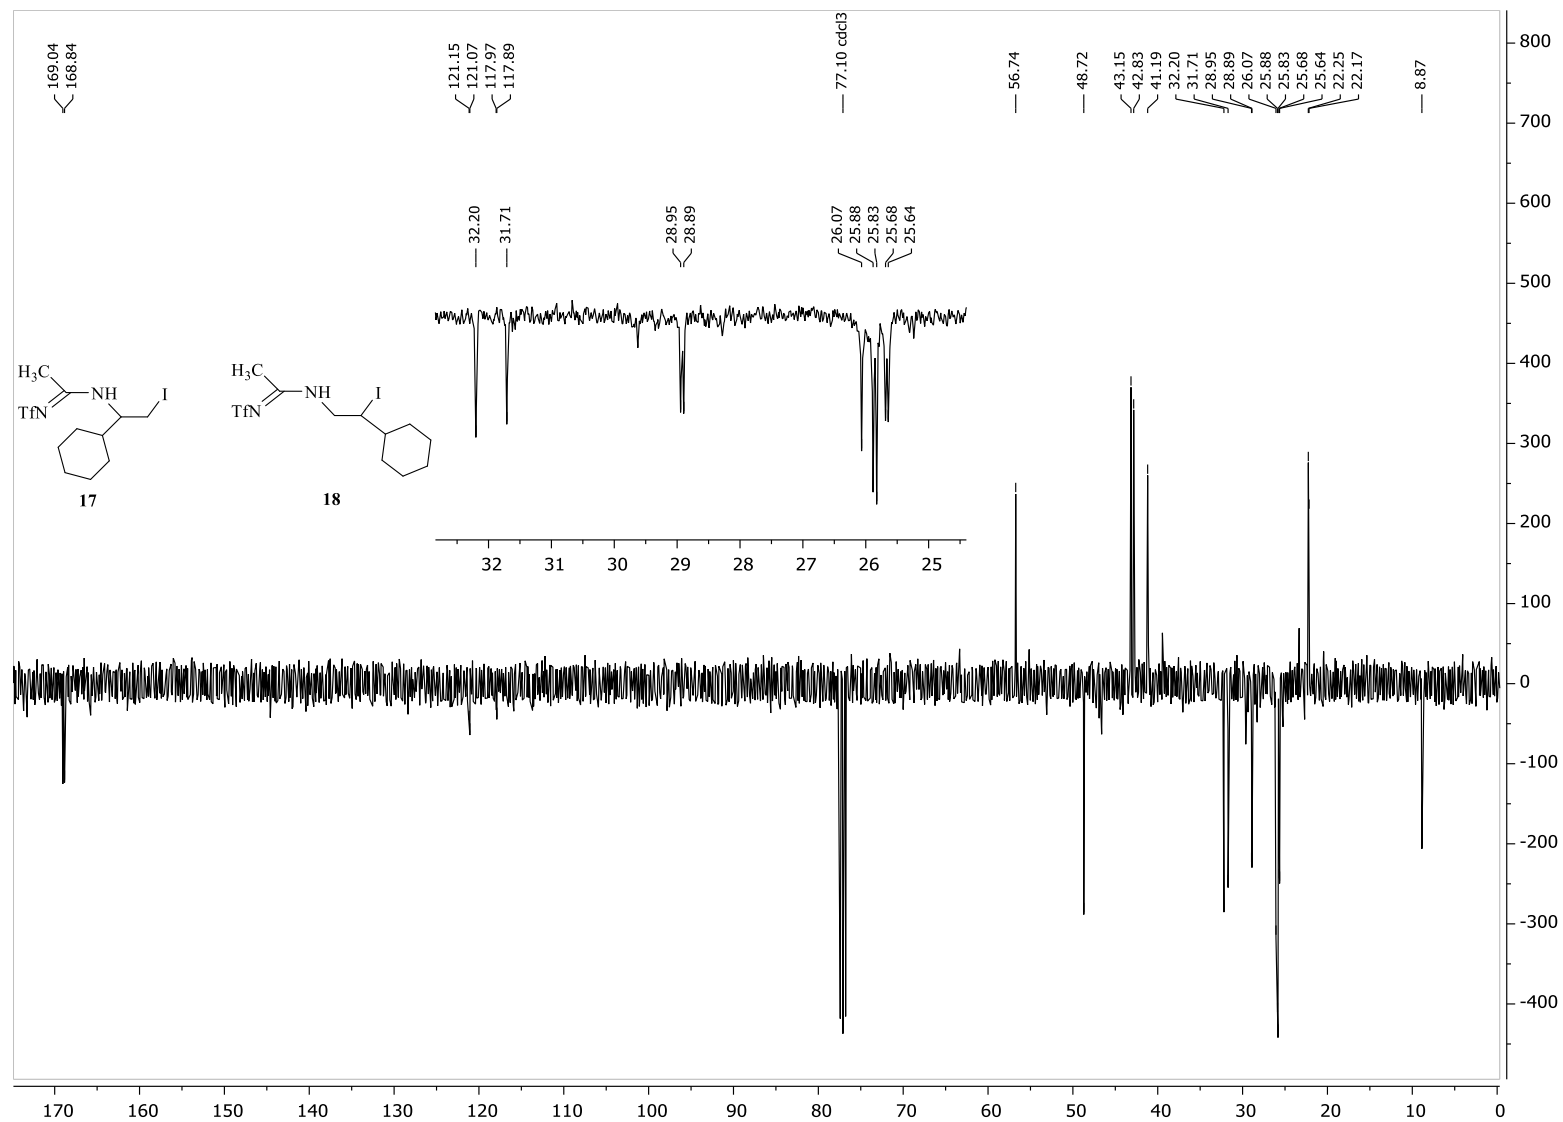



**Figure S32.**  $^{19}\text{F}$  NMR (376 MHz) of compounds **17** and **18**

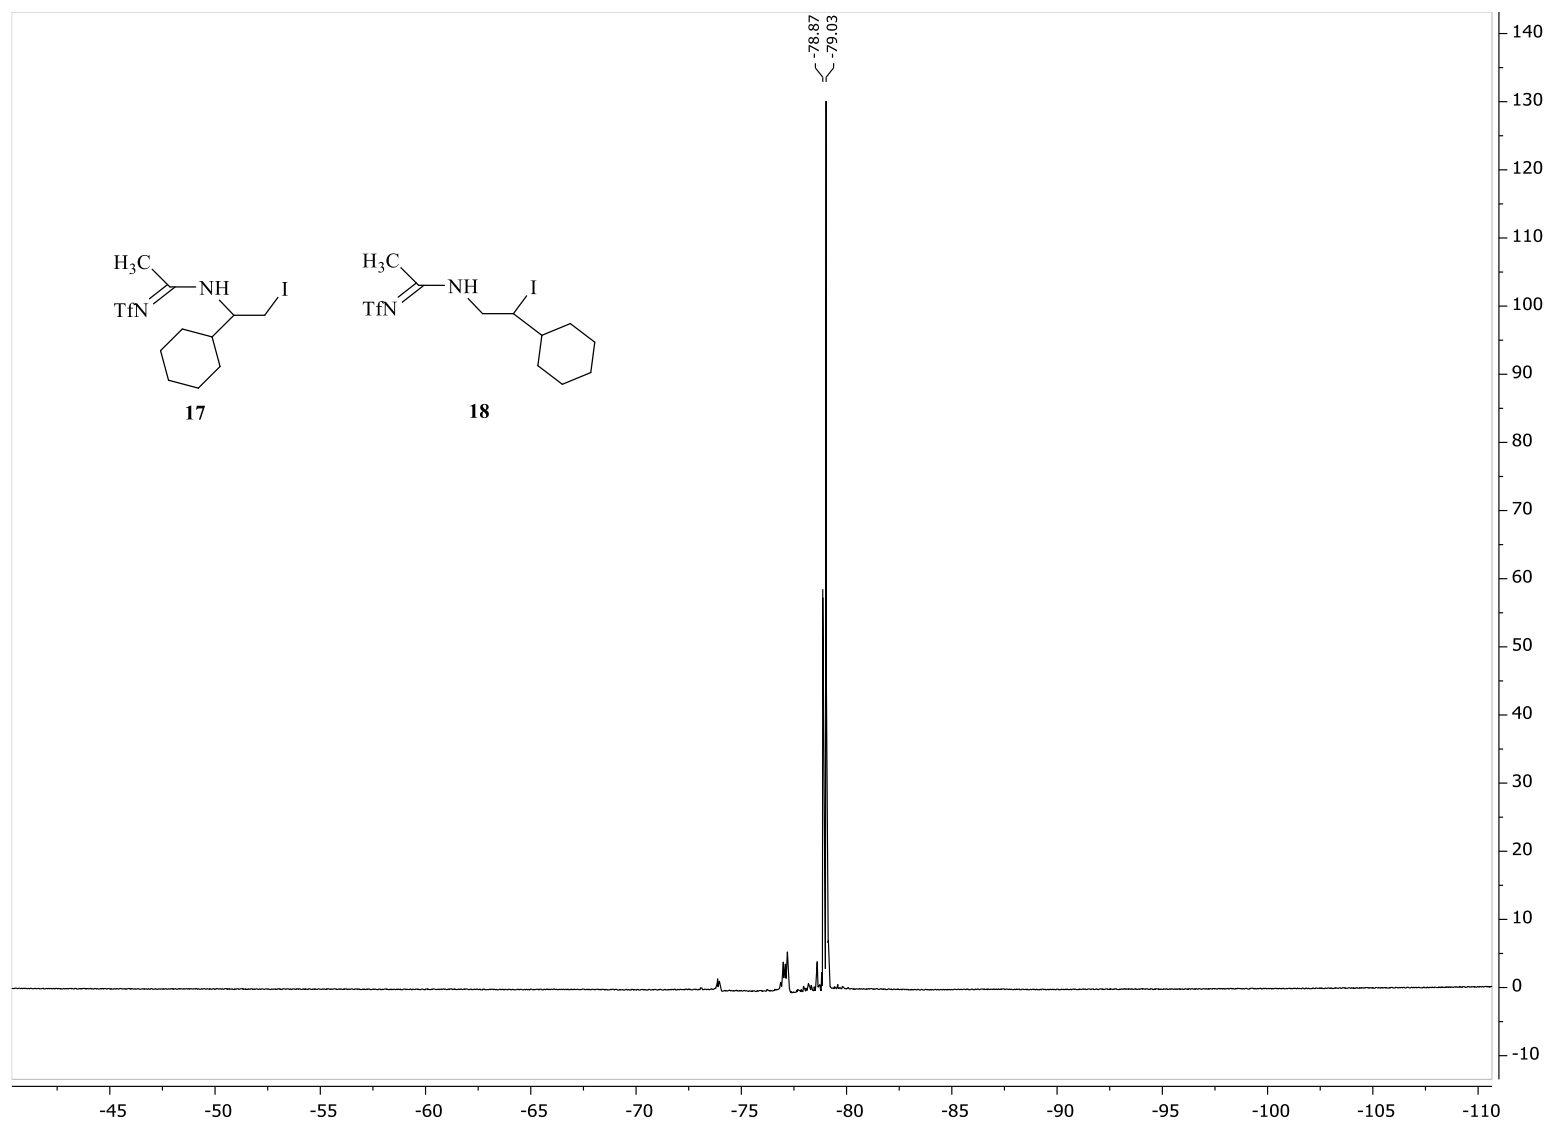

**Figure S33.**  $^1\text{H}$  NMR (400.1 MHz,  $\text{CDCl}_3$ ) of compound **18**

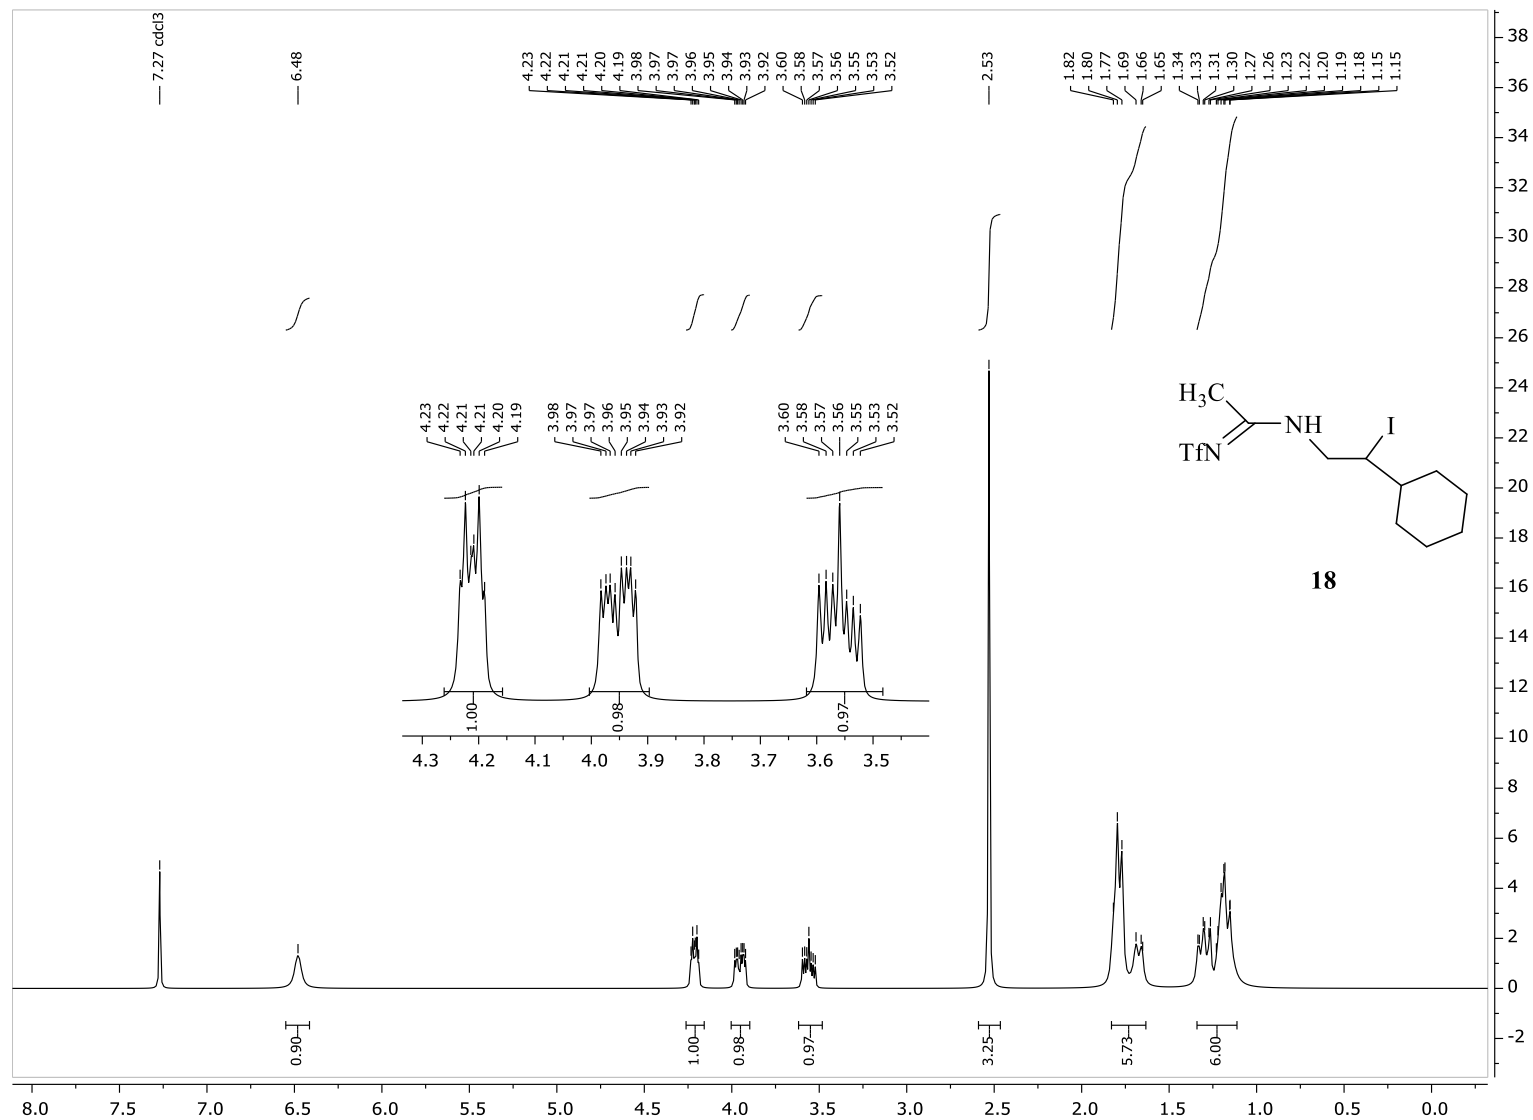

**Figure S34.**  $^{13}\text{C}$  NMR (100.6 MHz,  $\text{CDCl}_3$ ) of compound **18**

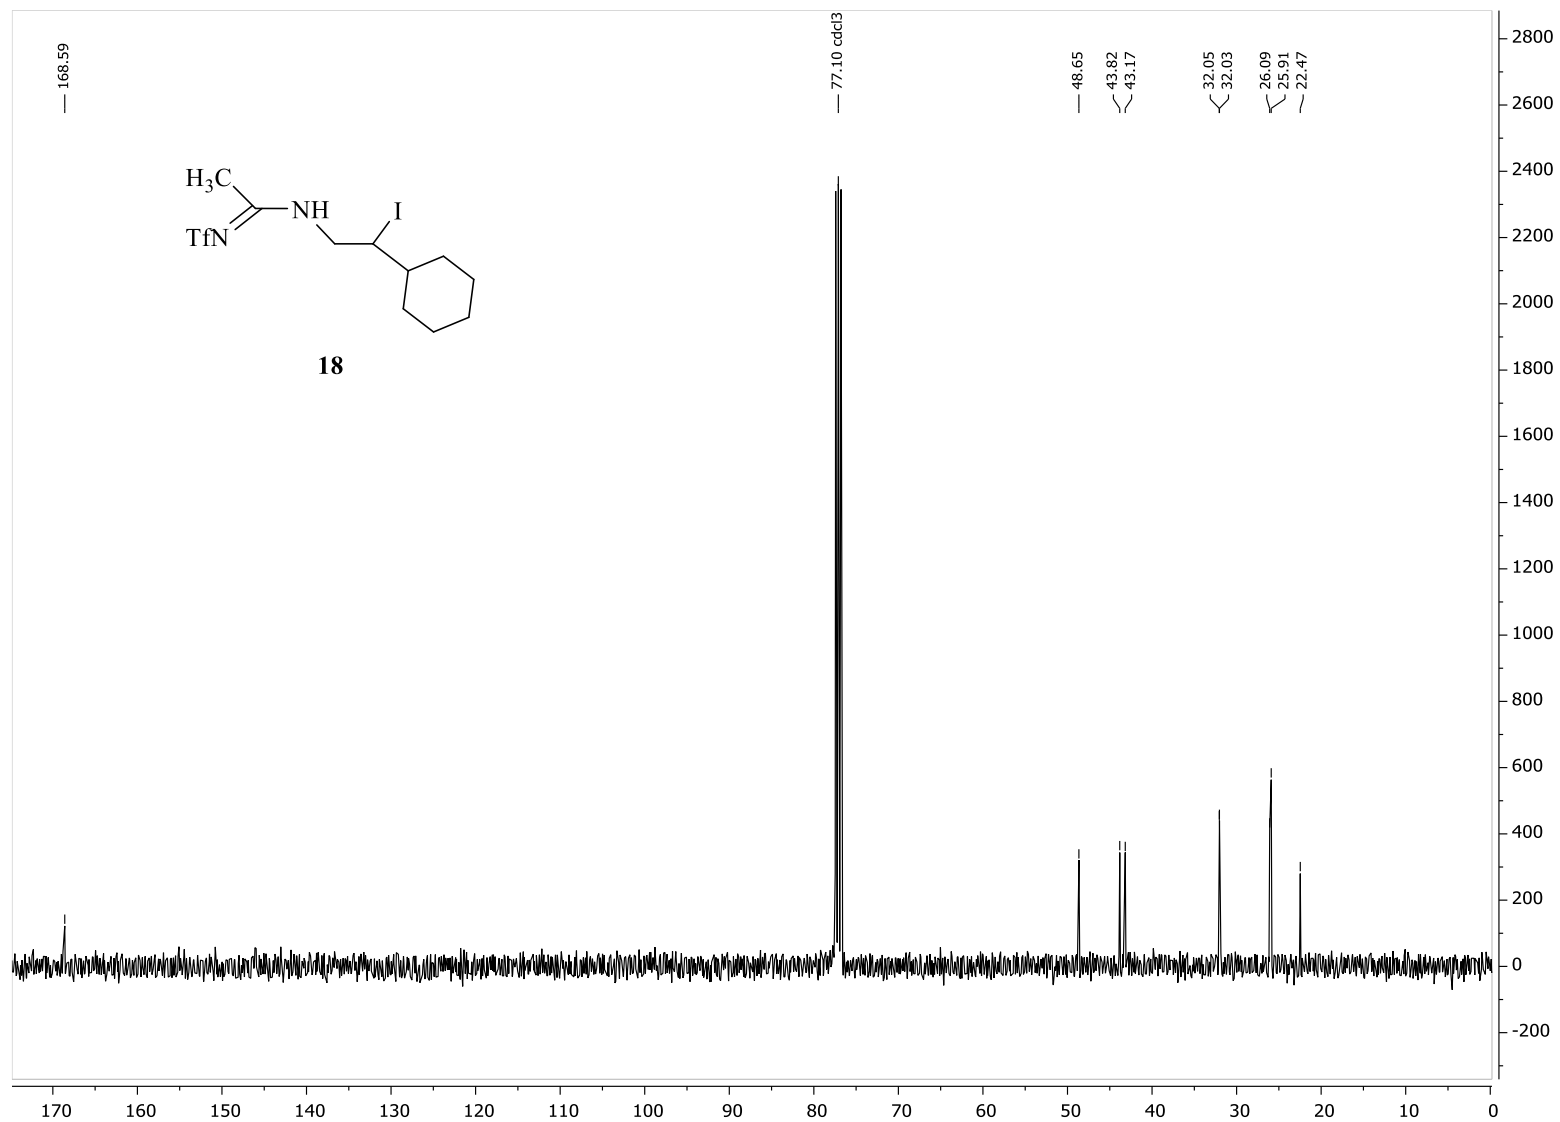

**Figure S35.**  $^{19}\text{F}$  NMR (376 MHz) of compound **18**

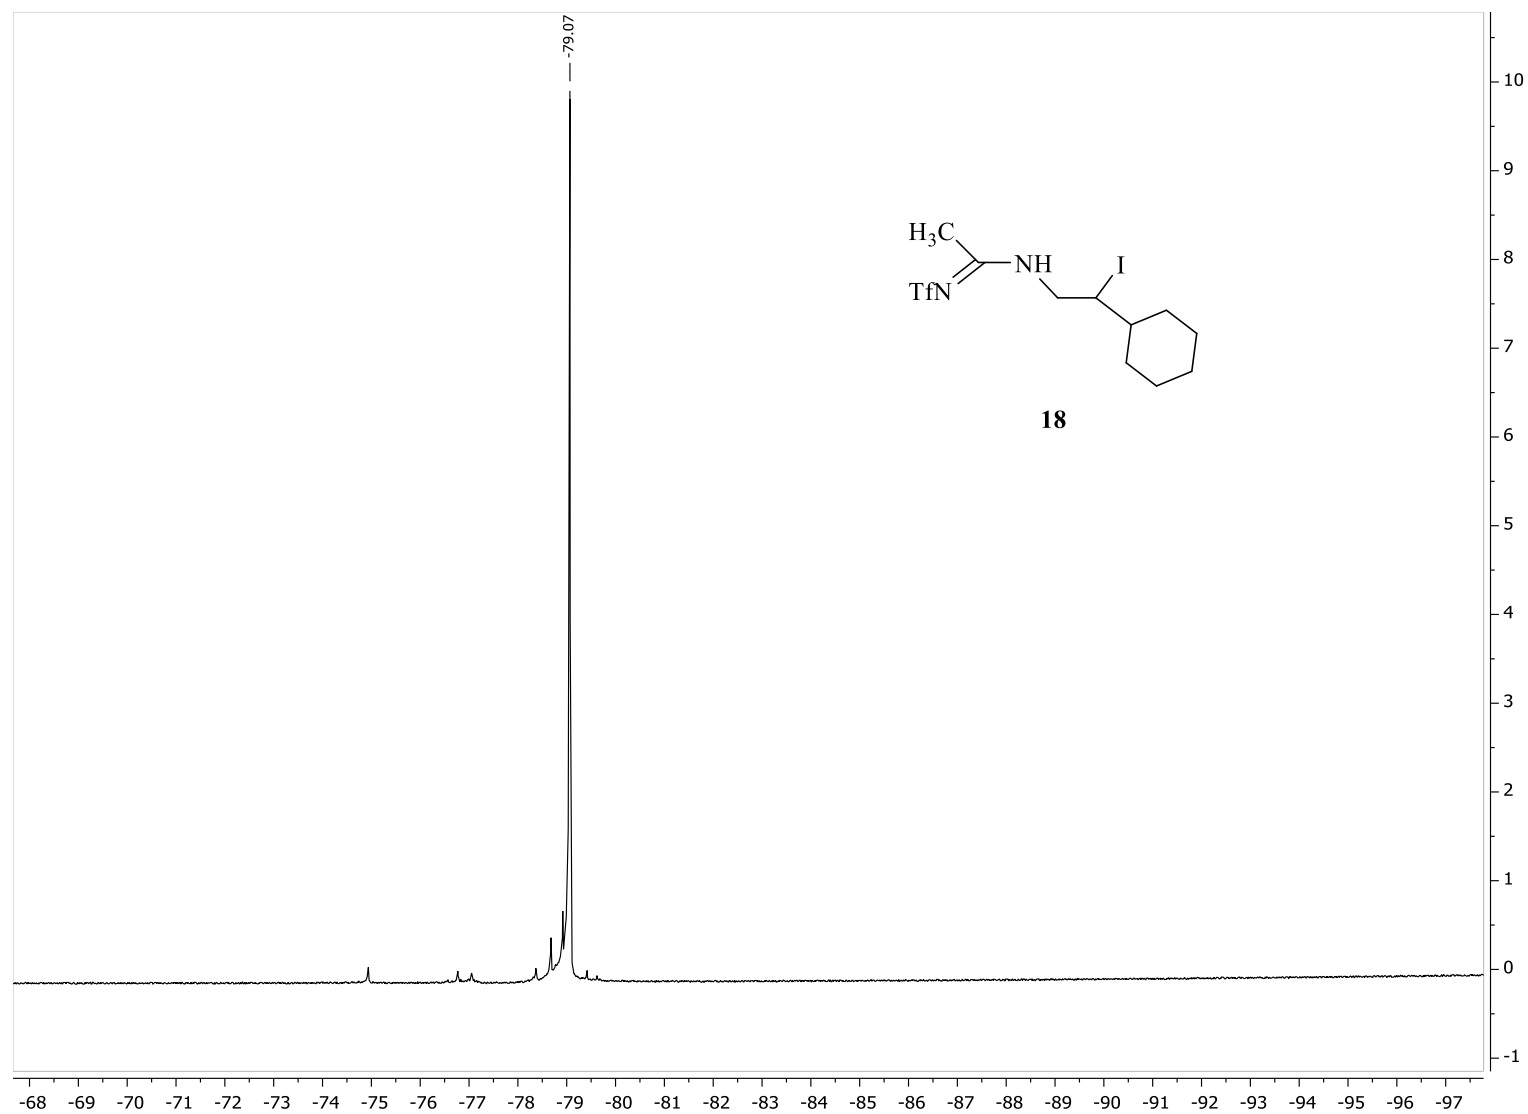

**Figure S36.**  $^1\text{H}$  NMR (400.1 MHz,  $\text{CDCl}_3$ ) of compound **19**

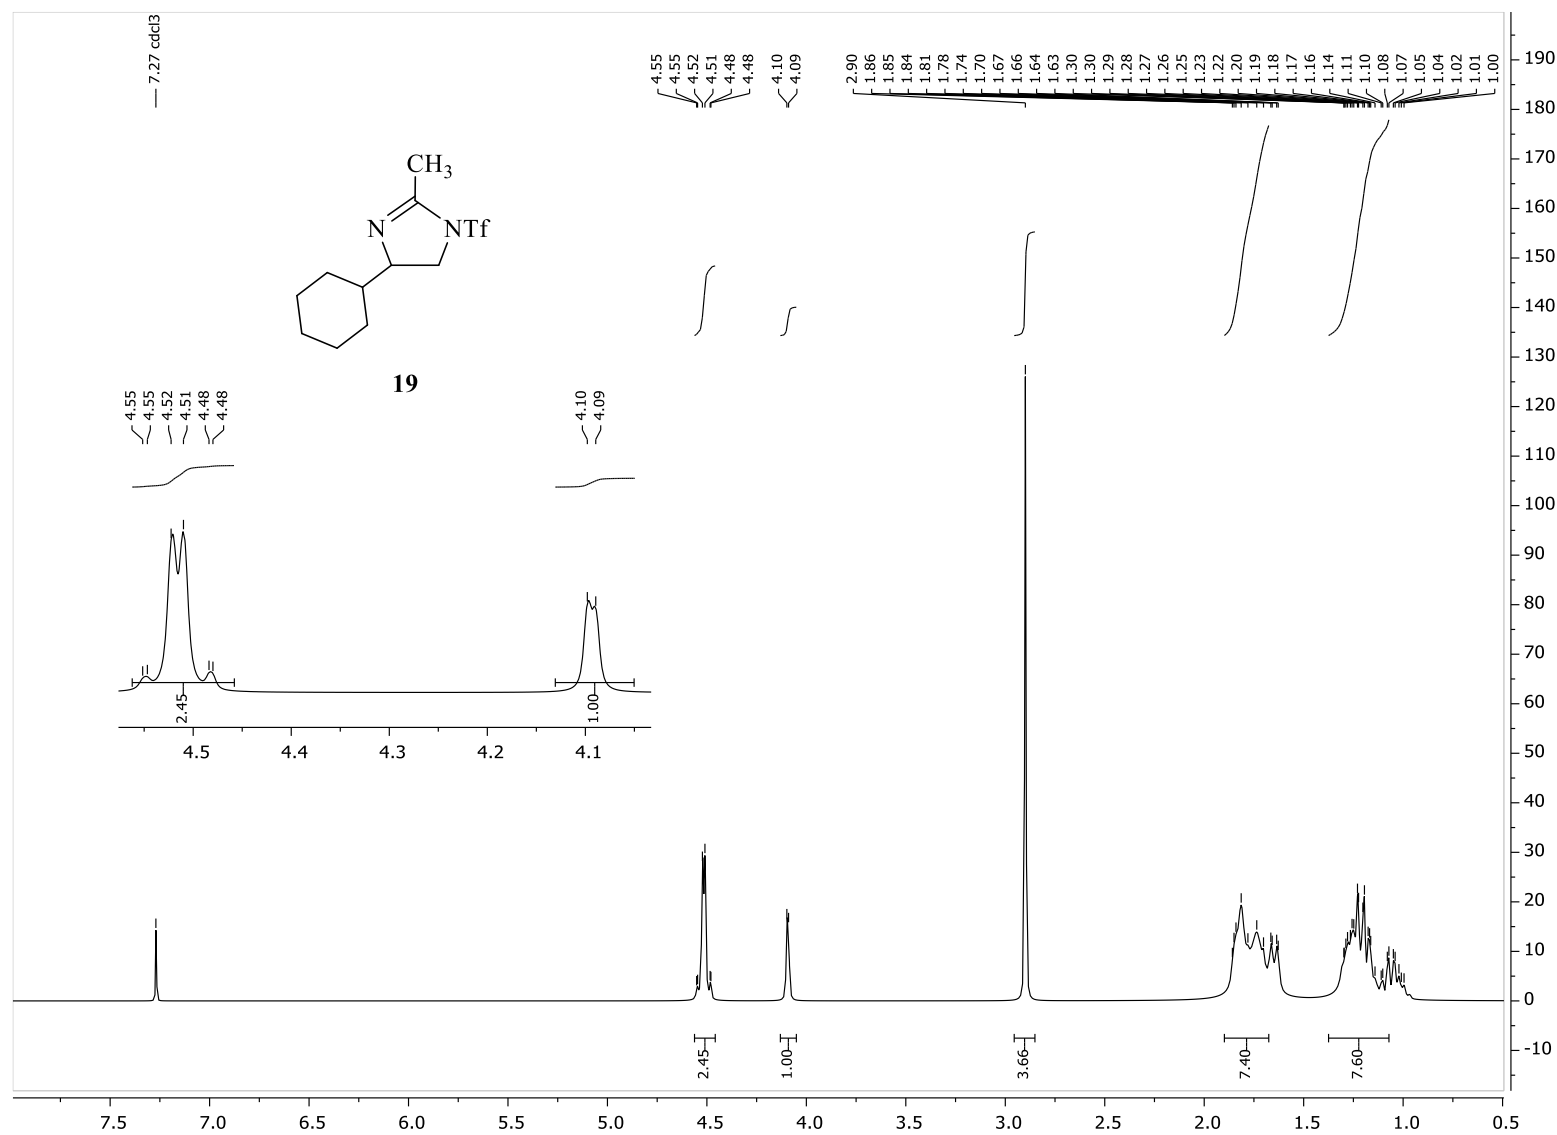

**Figure S37.**  $^{13}\text{C}$  NMR (100.6 MHz,  $\text{CDCl}_3$ ) of compound **19**

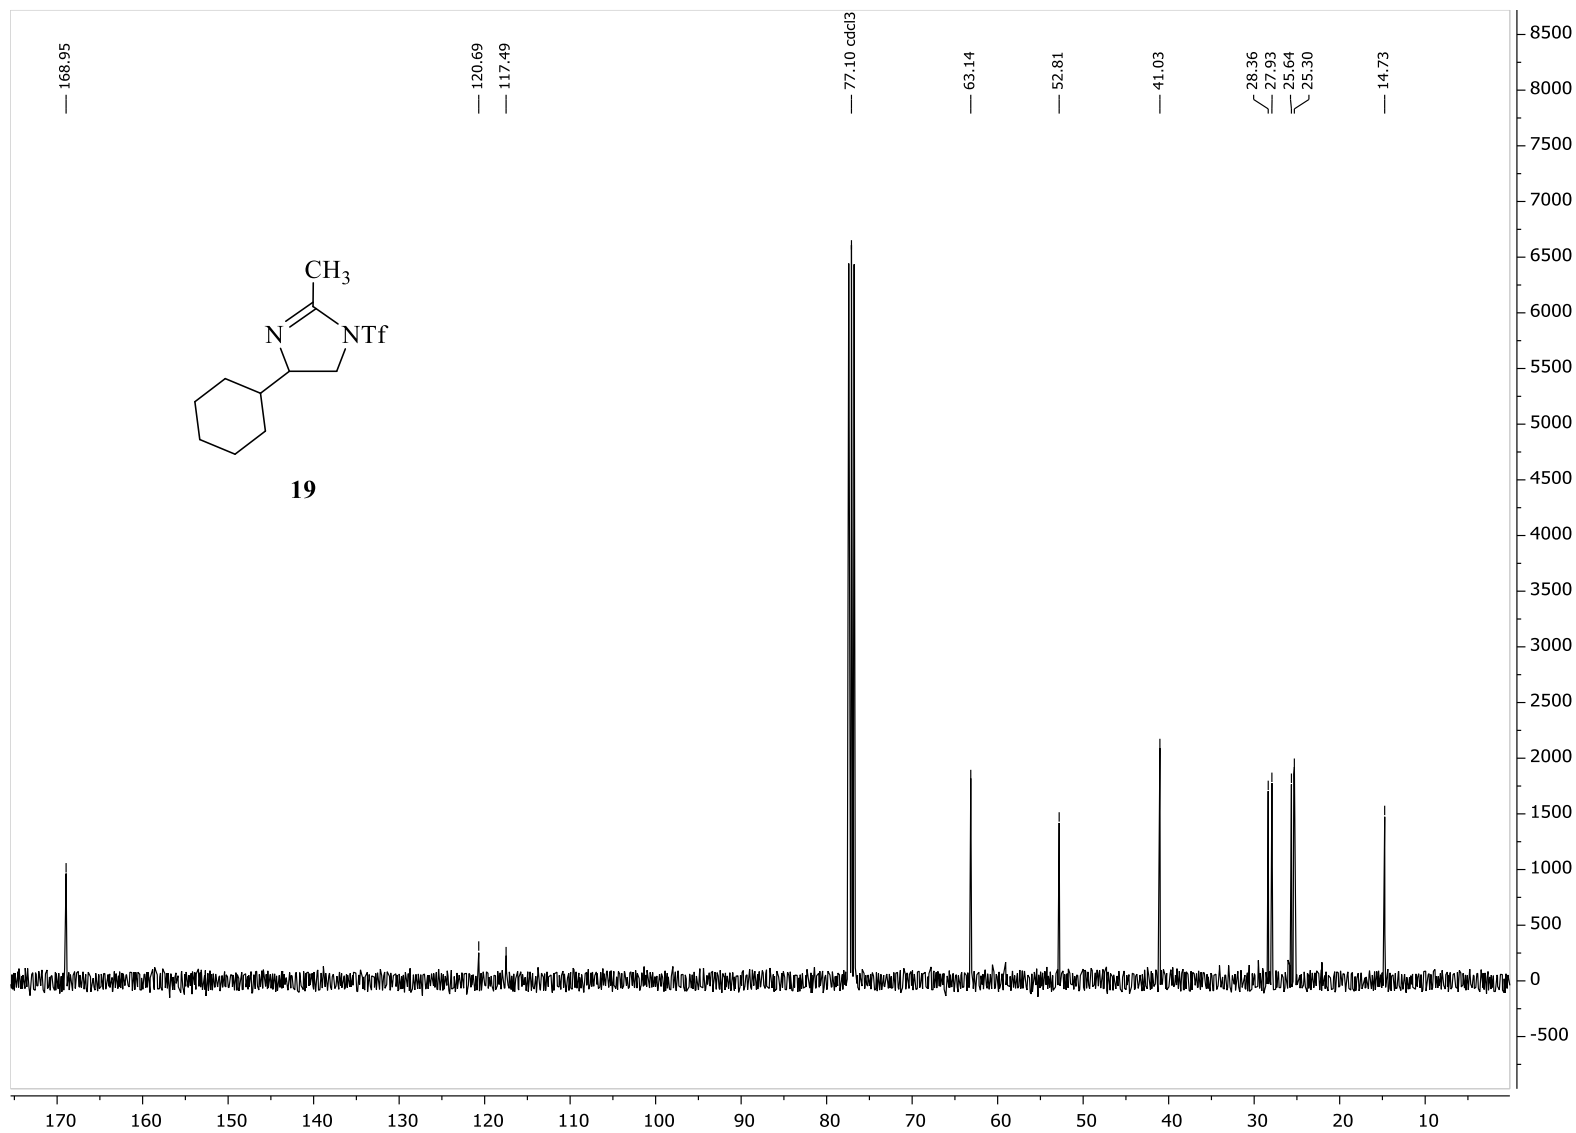

**Figure S38.**  $^{13}\text{C}$  J-modulation NMR (100.6 MHz,  $\text{CDCl}_3$ ) of compound **19**

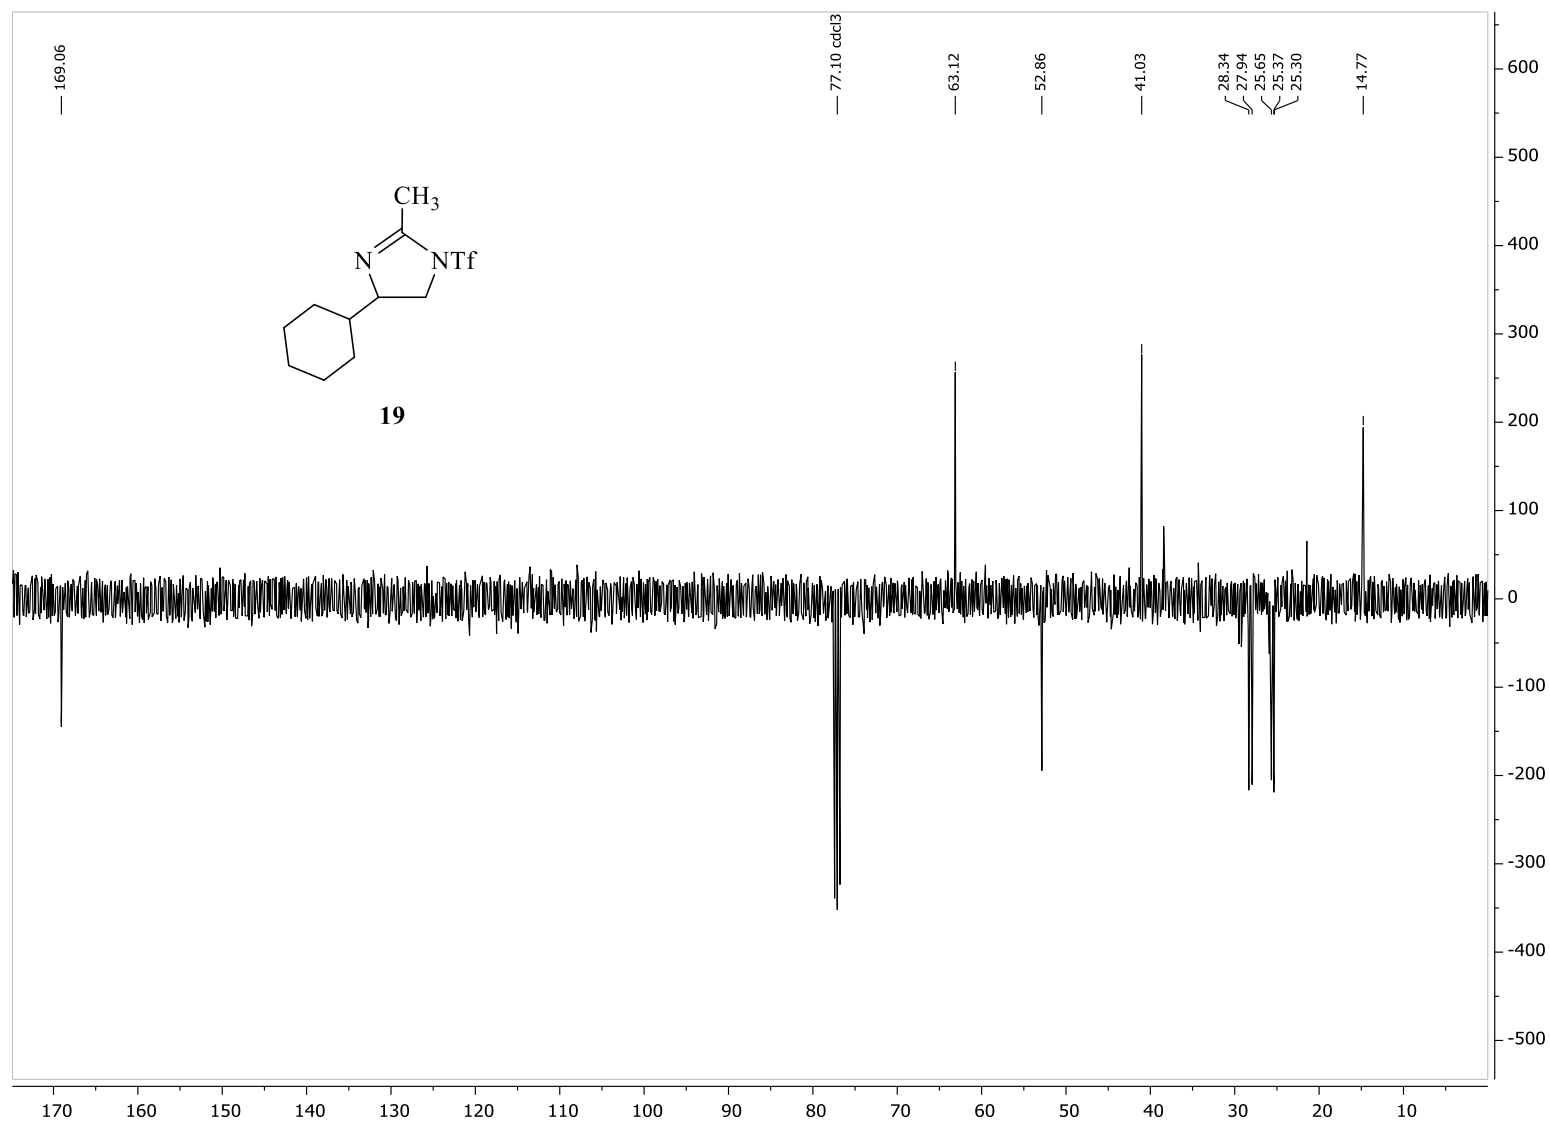

**Figure S39.**  $^{19}\text{F}$  NMR (376 MHz) of compound **19**

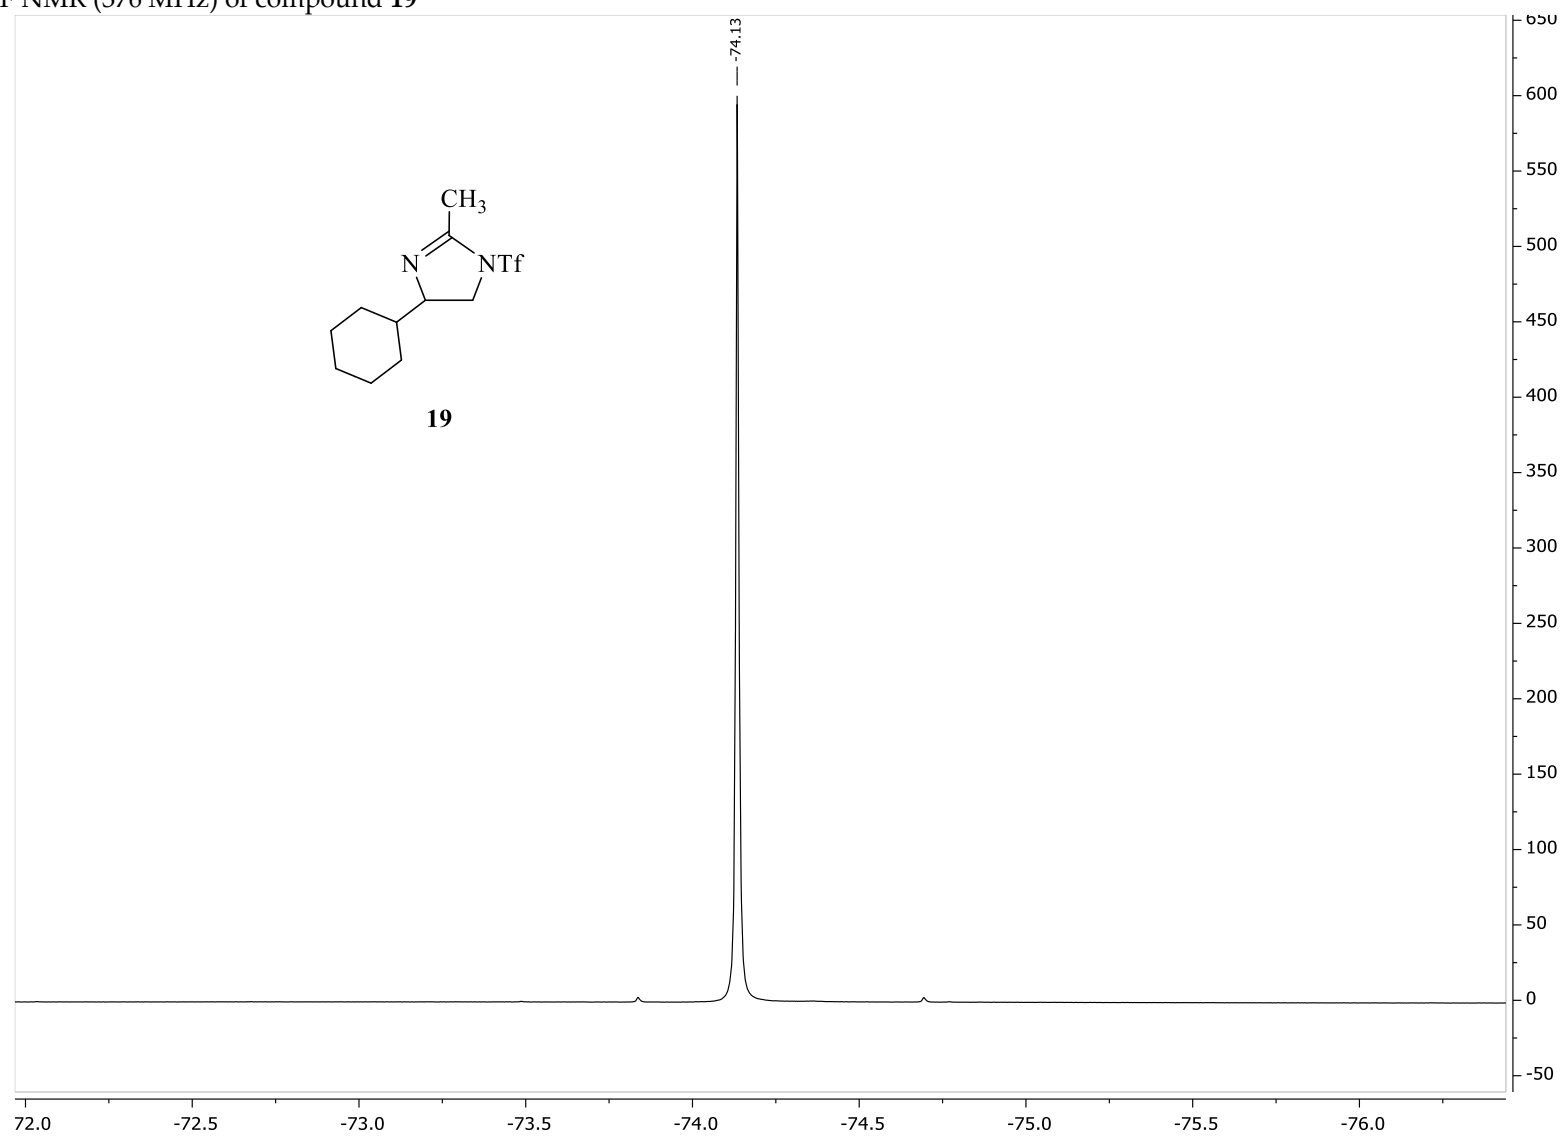



## 1.2 Copies of HRMS spectra

Figure S40. HRMS of compound 9

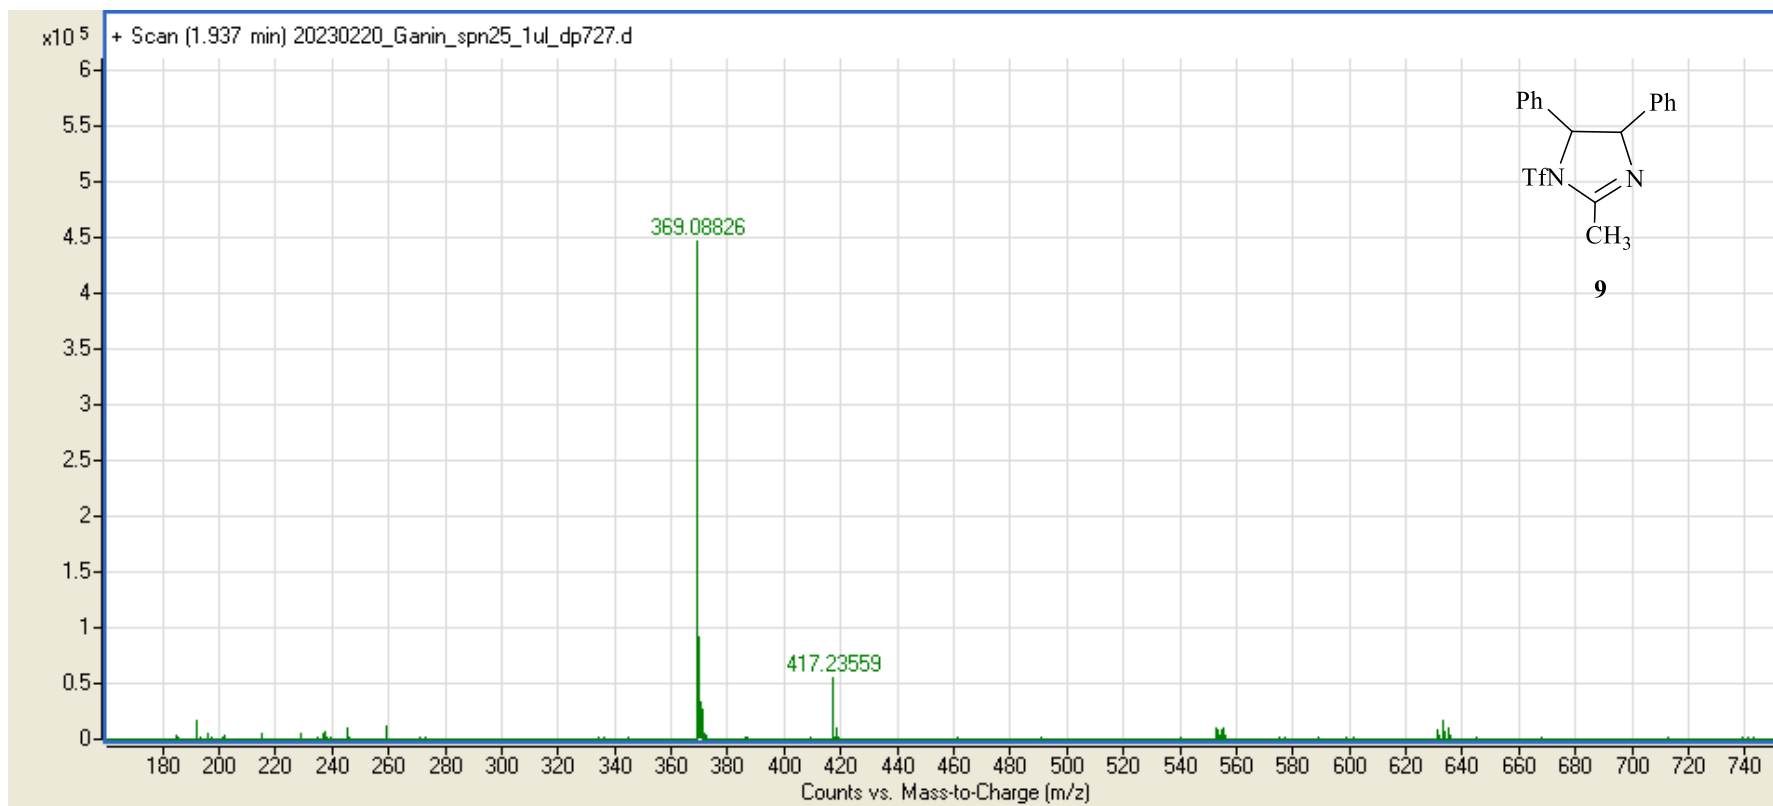

**Figure S41.** HRMS of compound **10**

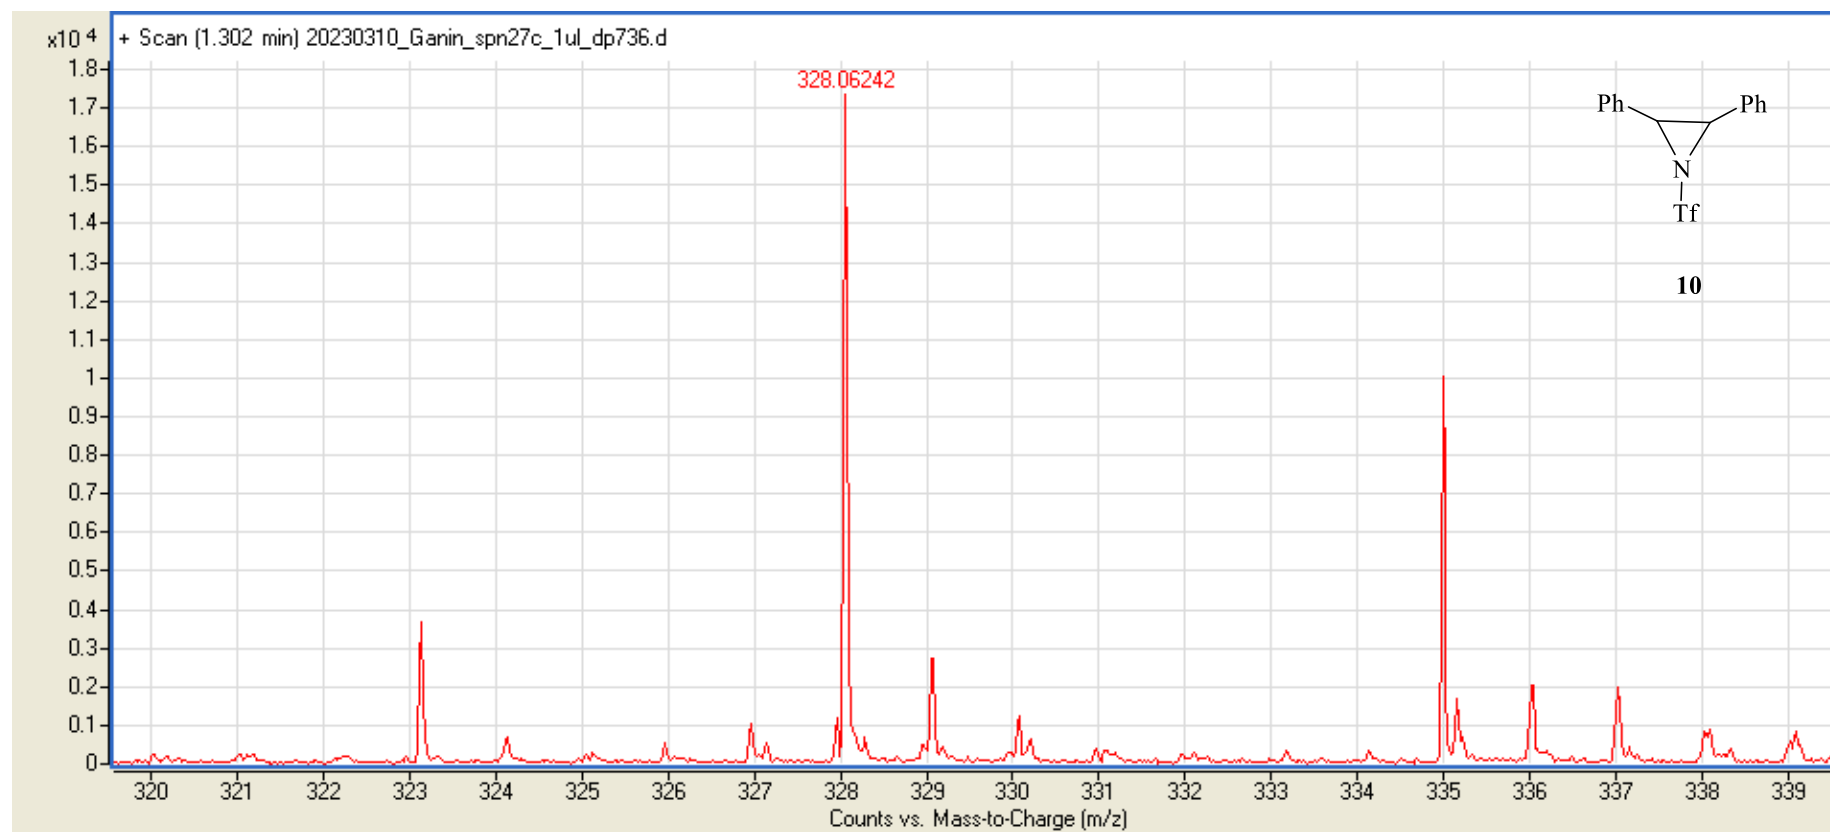

Figure S42. HRMS of compound 11

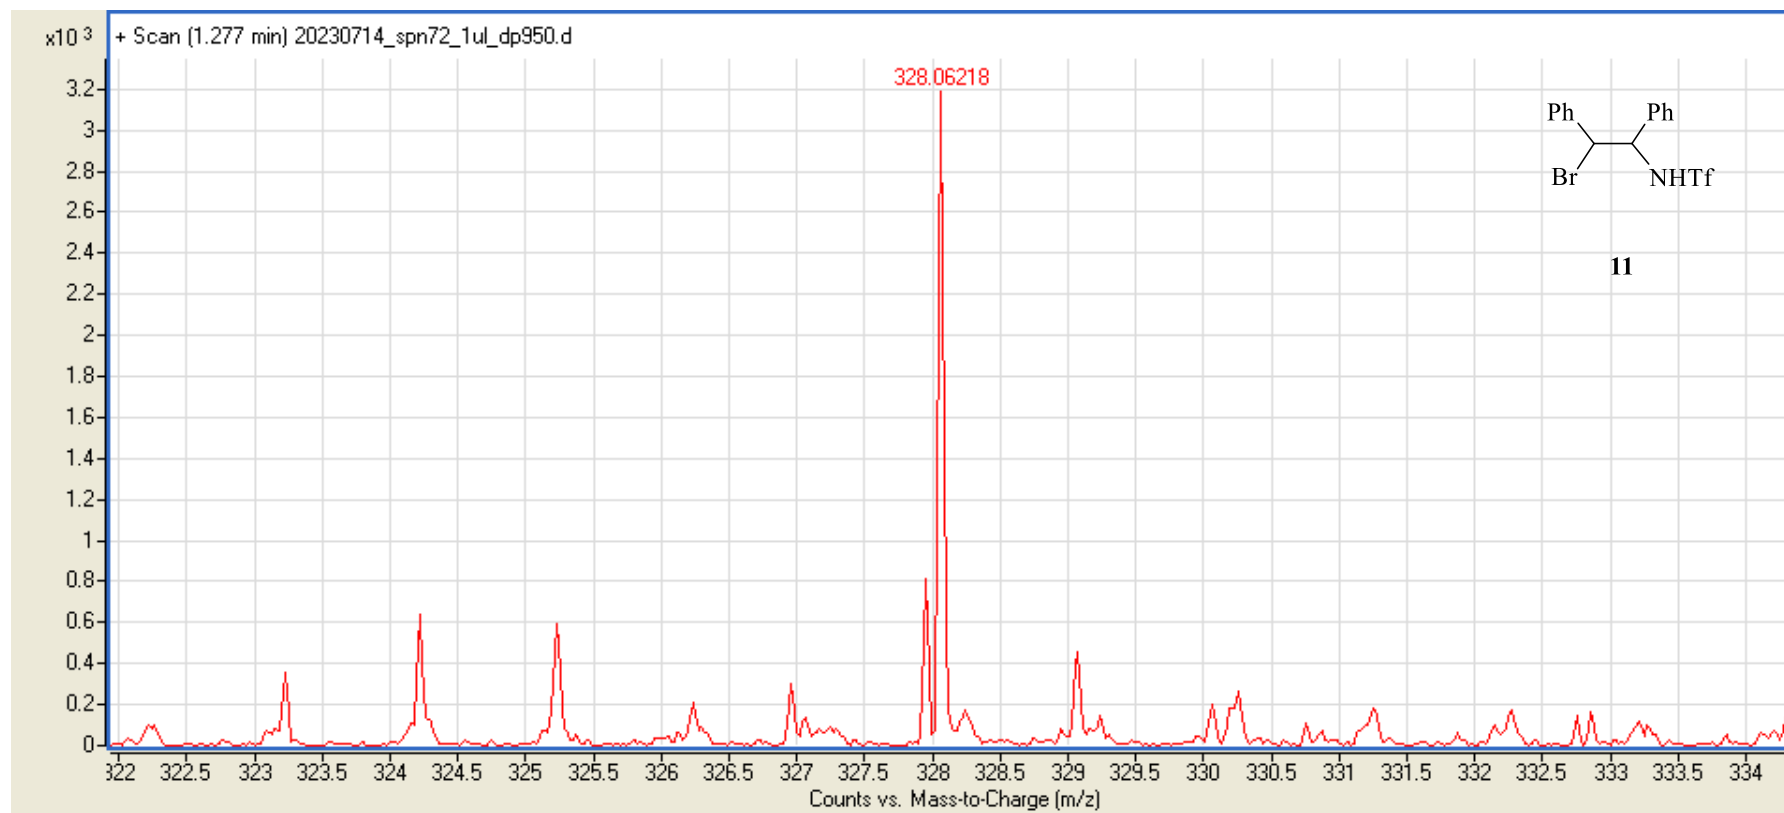

**Figure S43.** HRMS of compound **18**

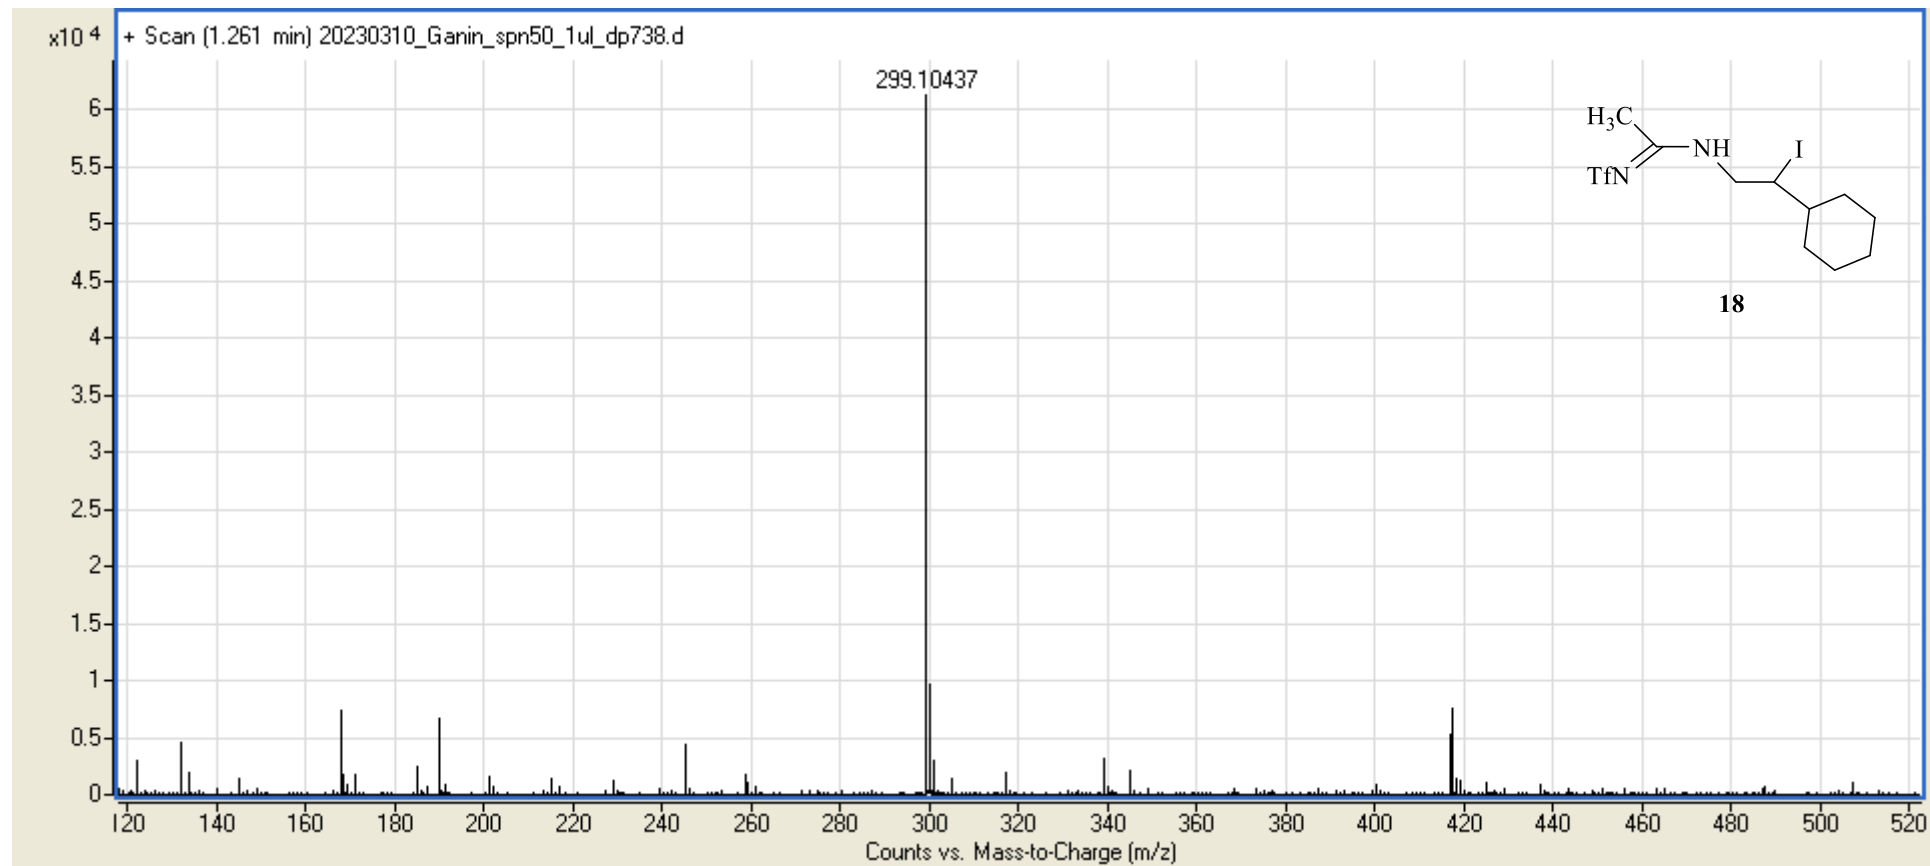

**Figure S44.** HRMS of compound **19**

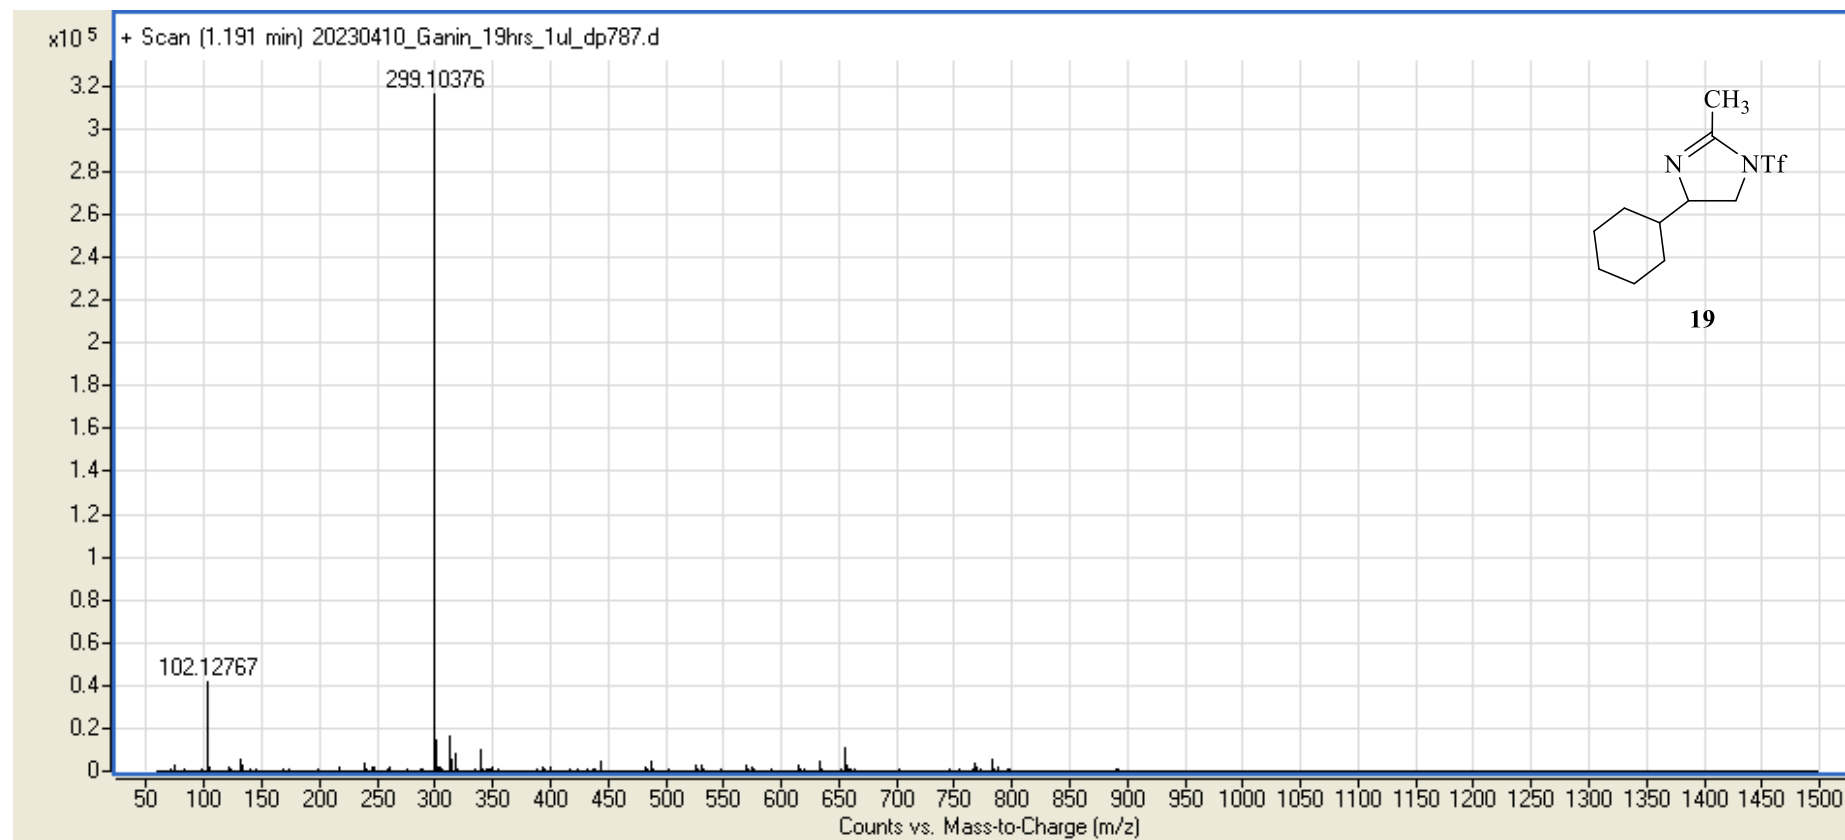

Supplement: s1 [file s1]
